# Supplementary material for: Identification and validation of feature genes associated with M1 macrophages in preeclampsia
Source: Aging (Albany NY). 2023 Dec 1;15(23):13822–39. doi: 10.18632/aging.205264 (PMC10756132; doi:10.18632/aging.205264)
Supplement: Supplementary Table 1 [file aging-15-205264-s001.xlsx]

## Sheet: Sheet1
Supplementary Table 1. Clinical data of the enrolled study participants.
Sample
Control	Age(years)	Height（cm）	Prepregnancy weight(kg)	Weight check at first antenatal examination(kg)	Prenatal weight(kg)	BMI	GDM	blood pressure（mmHg）	systolic blood pressure	diastolic blood pressure	pulse pressure	pulse rate	creatinine	urine protein	urine protein	glucose	OGTT	Newborn height（cm）	neonatal weight（g）	APgar score（1min）	APgar score（5min）	CRP	FIB（1.8-3.5）	PT	WBC	N%	ALT（11-66）	AST（15-46）
C1	30	160	63	63.5	75	27.6	0	128/83	128	83	45	98	46	±	1	4.02	6.78	47	3150	9	9	31.1	5.02	11.1	10.78	73.5	6.7	10.6
C2	30	160	50	51	74	28.9	0	129/71	129	71	58	100	37.4	—	0	4.5	4.06	49	3290	9	9	11	3.7	11.1	8.14	67.9	8.8	19.5
C3	35	158	70	70	76.8	30.7	0	121/77	121	77	44	88	32.4	—	0	7.05	5.22	49	3035	9	9	24.7	3.87	11.9	7	74.4	13	12
C4	32	160	57.5	58	79	30.85	1	121/74	121	74	47	90	42.3	—	0	4.29	9.3	52	3885	9	9	36.7	4.67	10.9	6.43	72.3	21	26
PE
PE1	35	170	68.5	69	80	27.68	0	146/80	146	80	66	94	39.3	±	1	3.45	7.51	54	4430	8	9	23.2	4.89	11.1	6.94	74.5	4.9	20.8
PE2	29	162	62.5	63	84	32	0	147/103	147	103	44	92	46.6	±	1	3.7	5.81	48	2280	8	9	35.5	5.16	10.2	8.22	66.7	14.5	17.6
PE3	29	160	55	55	74	28.9	0	140/100	140	100	40	80	69.7	±	1	3.66	5.05	52	3820	9	9	51.8	3.48	12.3	6.46	66.1	3.2	14.8
PE4	31	166	58	60	76	27.6	0	147/97	147	97	50	72	130.3	—	0	5.32	7.85	47	2090	8	9	14.8	2.09	12.7	9.89	55.44	46.5	45
PE5	34	168	80	80	93	32.9	0	182/118	182	118	64	98	61.5	1＋	2	4.5	——	44	2315	8	9	20.9	4.45	11	8.81	70	22	25
PE6	33	165	84	85	90	33.06	1	178/109	178	109	69	102	50.8	—	0	4.31	7.6	49	3605	8	9	21.9	4.81	11.2	10.72	71.4	5.5	14.4
PE7	30	170	78	79	93	32.18	1	168/112	168	112	56	100	67.5	3＋	3	4.44	5.11	42	1930	7	8	11	5.47	11	12.55	64.8	9.1	14.1
PE8	34	158	55	55	70	28.04	0	192/124	192	124	68	90	45.7	1＋	2	5.4	6.55	48	2550	8	9	4.84	3.28	10.9	6.81	74.4	40.3	35.4
