# Supplementary material for: Identification and validation of feature genes associated with M1 macrophages in preeclampsia
Source: Aging (Albany NY). 2023 Dec 1;15(23):13822–39. doi: 10.18632/aging.205264 (PMC10756132; doi:10.18632/aging.205264)
Supplement: Supplementary Table 2 [file aging-15-205264-s002.xlsx]

## Sheet: Sheet1
Supplementary Table 2. The expression matrix of each protein in both PE and control placental tissues.
Accession	ProteinDescriptions	Gene Name	MW [KDa]	Qvalue	Cscore	C1	C2	PE4	PE1	PE8	PE6	PE3	PE2	PE5	PE7	C4	C3
A0A024RBG1	Diphosphoinositol polyphosphate phosphohydrolase NUDT4B	NUDT4B	20.4341	0.00838305	0.777902						66.5656		71.2567	23.1907			110.006
A0A075B6H9	Immunoglobulin lambda variable 4-69	IGLV4-69	12.7733	0.00131848	0.849217	179.162	129.388	302.819	91.0509	48.2104	87.0478	120.018	124.631	99.7754	92.8202	139.788	107.977
A0A075B6I0	Immunoglobulin lambda variable 8-61	IGLV8-61	12.8144	0.00133486	0.840896	323.718	267.871	485.429	173.855	89.5667	168.564	682.337	110.827				201.637
A0A075B6J9	Immunoglobulin lambda variable 2-18	IGLV2-18	12.4117	0.000215916	0.899106	184.16	423.491	627.785	164.855	150.924	340.424	528.364	501.045	125.006	131.846	196.914	190.857
A0A075B6K4	Immunoglobulin lambda variable 3-10	IGLV3-10	12.4408	0.00133452	0.842836	130.914	41.903	184.007		87.4463			85.9532
A0A075B6K5	Immunoglobulin lambda variable 3-9	IGLV3-9	12.3317	6.39068e-05	0.963215	176.199	174.834	309.982	194.514	219.258	178.379	167.992	161.402	159.053	78.2251	203.014	90.081
A0A075B6P5	Immunoglobulin kappa variable 2-28	IGKV2-28	12.9567	0.00832034	0.778134	49.8961	58.7996			63.0743		66.4252	70.0277		39.6262		84.5942
A0A075B6Q5	Immunoglobulin heavy variable 3-64	IGHV3-64	12.8907	0.000237702	0.896389	555.36	517.516	2239.54	810.315	643.975	444.182	758.777	854.826	390.532	683.294	579.657	494.739
A0A075B6R9	Probable non-functional immunoglobulin kappa variable 2D-24	IGKV2D-24	13.0789	0.000355258	0.887915	522.569	1247.83	1385.71	848.045	426.104	323.844	1895.46	889.039	549.048	149.269	508.583	374.859
A0A075B6S2	Immunoglobulin kappa variable 2D-29	IGKV2D-29	13.1431	0.000189982	0.904078	362.456	584.997	449.745	217.548	333.599	212.986	553.564	382.789	552.357	319.808	646.162	523.078
A0A075B6S9	Probable non-functional immunoglobulinn kappa variable 1-37	IGKV1-37	12.6884	0.00886692	0.776147	149.857	82.0489			87.4891		69.5125					125.435
A0A087WSX0	Immunoglobulin lambda variable 5-45	IGLV5-45	13.1618	0.00933045	0.774513		282.913			211.523			375.245		301.5
A0A087WSY6	Immunoglobulin kappa variable 3D-15	IGKV3D-15	12.5342	0.000128612	0.928066	162.382	179.867	301.679	148.544	242.009	116.589	202.046	129.289	168.795	181.577	130.969	174.034
A0A087WSZ0	Immunoglobulin kappa variable 1D-8	IGKV1D-8	12.8367	0.00144739	0.828086			290.18				64.2401	231.803	207.666		160.306
A0A087WW87	Immunoglobulin kappa variable 2-40	IGKV2-40	13.3101	0.00024391	0.89568	70.4735	140.897	87.1341	68.3342	100.79	88.6299	35.5571	101.099	96.1096	46.1273	126.651	55.5065
A0A0A0MRZ8	Immunoglobulin kappa variable 3D-11	IGKV3D-11	12.6252	0.000185183	0.905592	2476.49	5347.66	2679.09	434.644	903.438	438.791	1108.51	1409.07	497.716	263.84	2403.81	1344.38
A0A0A0MS14	Immunoglobulin heavy variable 1-45	IGHV1-45	13.5084	0.00135001	0.834505	52.5298	51.3123			47.2143	50.9508		91.5224	23.4085		76.0909
A0A0A0MS15	Immunoglobulin heavy variable 3-49	IGHV3-49	13.0559	0.000198338	0.902124	187.444	132.267	340.579	117.715	167.626	124.134	217.337	165.099	163.268	144.156	110.842	141.246
A0A0A0MT36	Immunoglobulin kappa variable 6D-21	IGKV6D-21	12.3399	9.2228e-05	0.936361	257.967		169.025		357.359	189.212	262.193	111.596	190.747	260.508	371.47	351.153
A0A0B4J1U7	Immunoglobulin heavy variable 6-1	IGHV6-1	13.4813	0.000239445	0.896181	66.9623	59.6537	137.821	39.1943	114.517	58.9154	155.508	110.715	74.1303		29.6281	74.1172
A0A0B4J1V0	Immunoglobulin heavy variable 3-15	IGHV3-15	12.9258	0.000182918	0.906369	70.5936	78.7314	166.627	61.2045	119.741	62.0219	168.286	99.8712	87.2676	36.0169	54.2699	107.636
A0A0B4J1V6	Immunoglobulin heavy variable 3-73	IGHV3-73	12.8577	0.00796952	0.779465
A0A0B4J1X5	Immunoglobulin heavy variable 3-74	IGHV3-74	12.8396	0.00197971	0.813303	38.6105	15.8964	72.4455	30.3886	72.134	25.7722	41.0932	56.8103	58.924	24.795		40.7096
A0A0B4J1X8	Immunoglobulin heavy variable 3-43	IGHV3-43	13.0768	0.000156584	0.918354		277.652	521.274			229.789	152.558	120.377				158.662
A0A0B4J1Y8	Immunoglobulin lambda variable 9-49	IGLV9-49	13.0237	0.00109983	0.862153	400.494	570.73	420.319					291.467			195.004	194.271
A0A0B4J1Y9	Immunoglobulin heavy variable 3-72	IGHV3-72	13.2029	0.000163364	0.913635	55.2224	176.111	169.431	36.2965	64.7995	43.002	81.3265	77.222	52.8571	35.6846	74.7123	81.6476
A0A0B4J2D5	Putative glutamine amidotransferase-like class 1 domain-containing protein 3B, mitochondrial	GATD3B	28.1424	7.07872e-05	0.957498	179.677	222.567	197.594	217.137	227.962	185.708	207.784	180.028	158.01	206.766	186.91	173.343
A0A0C4DH24	Immunoglobulin kappa variable 6-21	IGKV6-21	12.43	0.000215488	0.899176	55.1869		231.669	217.04	95.8024	90.6375	183.247	82.9991	46.8093			95.6072
A0A0C4DH25	Immunoglobulin kappa variable 3D-20	IGKV3D-20	12.5151	0.000216291	0.899037	2325.65	3001.4	5319.68	1632.93	3032.53	2058.52	3550.25	2032.9	2471.32	1917.46	2233.44	1759.86
A0A0C4DH29	Immunoglobulin heavy variable 1-3	IGHV1-3	13.0077	0.000101177	0.933891	3860.87	4557.45	5373.28	2493.24	2399.86	2858.89	3643.78	3565.06	2189.8	1210.43	3815.05	2183.46
A0A0C4DH31	Immunoglobulin heavy variable 1-18	IGHV1-18	12.8204	0.000157957	0.917084	122.609	87.5851	132.844	41.8929	138.769	59.5624	100.361	36.5959	75.0117		33.4565	46.3102
A0A0C4DH34	Immunoglobulin heavy variable 4-28	IGHV4-28	13.1241	0.00246137	0.805769	47.4199	47.356	64.4568	45.6511		52.1805	76.5078	52.1286			103.556
A0A0C4DH35	Probable non-functional immunoglobulin heavy variable 3-35	IGHV3-35	12.8104	0.000115482	0.930745	1552.13	1113.52	2185.73	876.059	1410.54	857.725	1500.67	1418.21	1009.68	688.196	1242.77	1083.73
A0A0C4DH36	Probable non-functional immunoglobulin heavy variable 3-38	IGHV3-38	12.7585	0.000140597	0.92509	429.209	322.958	550.923	207.335		298.743	585.707	234.386	338.187	188.853	408.459	210.509
A0A0C4DH38	Immunoglobulin heavy variable 5-51	IGHV5-51	12.6745	0.000179805	0.907385	1429.12	819.468	1695.53	487.957	1347.8	627.627	1111.59	732.794	694.484	571.111	928.93	581.254
A0A0C4DH41	Immunoglobulin heavy variable 4-61	IGHV4-61	13.0659	0.00102707	0.864735	17.8682	13.0779	8.67733	8.11394	30.1083	19.2446	17.9017	24.2808	46.2936			11.9716
A0A0C4DH67	Immunoglobulin kappa variable 1-8	IGKV1-8	12.5373	0.00101858	0.865005	26.3656	45.8626	97.7085	32.3595	39.5404	29.3805	45.5451	66.2082	37.6905	33.8201	41.5813	31.6653
A0A0J9YX35	Immunoglobulin heavy variable 3-64D	IGHV3-64D	12.8226	0.000968741	0.866694	538.971	637.385	815.282	323.527	370.638	337.834	631.365	270.232	467.292	278.519	429.86	476.177
A0A0U1RQF7	DPEP2 neighbor protein	DPEP2NB	13.4022	7.07872e-05	0.95555	60.9181	16.1255	35.6074	60.8548	27.2166	43.3955	54.6134	61.4553	70.4354	45.2743	39.01	41.0836
A0A2R8Y7D0	Ubiquitin domain-containing protein TINCR	TINCR	13.7877	0.00295822	0.802036	31.3235				46.1442	17.1779		34.2519	48.3944	48.7882		45.6564
A0AV96	RNA-binding protein 47	RBM47	64.0991	7.9658e-05	0.942804	182.826	174.426	198.551	195.049	184.943	177	176.576	213.005	255.782	221.893	169.691	247.132
A0AVT1	Ubiquitin-like modifier-activating enzyme 6	UBA6	117.97	7.17419e-05	0.950361	139.764	141.93	165.192	176.882	156.879	174.709	162.762	150.176	145.217	119.166	197.399	201.537
A0FGR8	Extended synaptotagmin-2	ESYT2	102.357	1.68985e-07	0.981765	221.851	242.199	159.263	180.597	206.315	216.588	183.083	206.264	200.453	200.781	169.781	200.612
A0JNW5	UHRF1-binding protein 1-like	UHRF1BP1L	164.198	0.00015836	0.916868	47.2696	47.8548	44.5376	38.35	31.4327	35.3935	36.6643	43.7545	44.7635	53.6965	32.2735	41.6315
A0M8Q6	Immunoglobulin lambda constant 7	IGLC7	11.2536	0.000280731	0.892465	58.0432	16.5535			30.3004	36.8382	119.574	26.1212	14.9673			34.479
A0MZ66	Shootin-1	SHTN1	71.6399	0.000129328	0.927884	43.3668	44.9168	47.292	55.377	60.7542	52.8578	57.0831	47.7889	63.3527	47.3863	88.5981	88.051
A0PJW6	Transmembrane protein 223	TMEM223	22.049	0.00189975	0.815298	43.5273	141.967	76.9841	63.0041		173.554	46.2243	49.5689	46.5109	44.7134	47.5503	39.1993
A0PK00	Transmembrane protein 120B	TMEM120B	40.2458	0.00220495	0.808824	32.2657	37.3269		33.4783	58.0422		46.1164	34.775	37.6334
A1A4S6	Rho GTPase-activating protein 10	ARHGAP10	89.3746	0.00128372	0.853025	61.6327	215.06	46.2935	35.6742		47.8598	291.784	40.5043	52.212	37.6107	49.2099	40.5856
A1IGU5	Rho guanine nucleotide exchange factor 37	ARHGEF37	76.2782	7.07872e-05	0.956107	123.579	110.592	47.8767	146.378	78.7732	104.004	99.4444	135.763	58.0363	143.867	44.3334	78.0396
A1L0T0	2-hydroxyacyl-CoA lyase 2	ILVBL	67.8677	6.55912e-05	0.962761	357.601	428.689	628.486	385.575	533.146	421.367	316.766	388.737	372.325	506.658	289.823	442.922
A1L390	Pleckstrin homology domain-containing family G member 3	PLEKHG3	134.412	0.000382644	0.886589	56.5738	59.1712	44.3205	48.4681	39.6467	54.4833	43.5971	46.0484	51.091	57.0017	46.9881	43.0975
A1L4H1	Soluble scavenger receptor cysteine-rich domain-containing protein SSC5D	SSC5D	165.743	0.000147925	0.922771		78.6092					356.435			97.495	299.627	89.5472
A1X283	SH3 and PX domain-containing protein 2B	SH3PXD2B	101.579	0.00012985	0.927757	72.5621	83.1289	44.9939	63.6055	50.8266	75.425	55.0862	46.2903	49.1719	40.0145	154.857	92.7856
A2A2Y4	FERM domain-containing protein 3	FRMD3	68.772	0.001326	0.846839	37.322	40.3611	9.32987	18.7481	16.8302	25.1769	33.5719	36.4351	20.1681		32.9137	20.9701
A2A2Z9	Ankyrin repeat domain-containing protein 18B	ANKRD18B	118.231	0.000241164	0.895961	37.2931	25.9582	38.8511	17.2109	20.1997	31.0977	34.7767	18.3358	36.9208	19.628	43.1018	16.2586
A2RRD8	Zinc finger protein 320	ZNF320	59.3264	0.00219518	0.80898	359.877	18.7615	5510.23	451.207	763.529	464.945	440.304	436.811	397.84		613.249	236.711
A2RRP1	Neuroblastoma-amplified sequence	NBAS	268.571	8.92465e-05	0.937408	92.537	97.0529	80.6488	85.0828	84.3163	91.1145	95.4241	91.6934	103.181	89.6786	77.1226	85.9812
A2RU48	Single-pass membrane and coiled-coil domain-containing protein 3	SMCO3	24.8771	0.000156968	0.917883		10.4053				2.81198	28.2486
A2RU67	Protein FAM234B	FAM234B	67.0385	0.00484705	0.792284	61.8423	51.8852	158.22		53.2183	19.7436	65.8054	75.2251	130.04			84.2193
A2RUS2	DENN domain-containing protein 3	DENND3	135.89	0.00132127	0.848105	48.03	16.1616		76.2537	41.3266	36.9051	28.5715	54.687	38.1847	28.5224	43.1113	37.6956
A3KMH1	von Willebrand factor A domain-containing protein 8	VWA8	214.824	0.000396477	0.885946	75.5332	44.0426	54.1137	63.6259	97.7263	63.9569	58.061	70.5632	62.0911	43.6029	57.7887	80.6572
A3KN83	Protein strawberry notch homolog 1	SBNO1	154.312	0.000177625	0.908143	53.9564	54.4532	39.8901	72.6155	42.351	55.7515	46.5682	52.5141	64.2394	51.4563	55.7062	69.3839
A4D126	D-ribitol-5-phosphate cytidylyltransferase	CRPPA	49.8726	0.000572346	0.879519		35.8022	34.1831	49.3236	26.655	37.4607	28.463	52.4031	50.6766	44.7018	36.3087	39.0942
A4D1P6	WD repeat-containing protein 91	WDR91	83.3444	0.000159393	0.915783	85.2444	107.174	69.2256	81.0102	79.6833	91.465	91.5269	84.5658	81.0189	92.2354	71.7072	89.8471
A4FU01	Myotubularin-related protein 11	MTMR11	79.5454	0.00488581	0.792093							24.1622	32.2099		53.1935
A5A3E0	POTE ankyrin domain family member F	POTEF	121.445	0.00133475	0.842239	8292.08	13467.8	8818.96	6042.42	5068.3	18861.1	10781	4847.15	4579.3	5145.56	4783.11	6313.65
A5D8V6	Vacuolar protein sorting-associated protein 37C	VPS37C	38.659	0.0017843	0.818171	149.769		128.992	146.945	115.208	139.127	146.625		147.512	168.034	125.69	163.719
A5PLL7	Plasmanylethanolamine desaturase	PEDS1	31.135	0.000113823	0.931142	277.672	225.323	323.714	245.633	307.574	278.036	267.085	273.248	267.93	352.305	7.67932	195.982
A5PLN9	Trafficking protein particle complex subunit 13	TRAPPC13	46.5235	0.000115808	0.930674	70.8483	84.542	67.3145	76.2484	96.2526	85.5678	64.8372	88.3674	84.2286	52.5527	56.0086	61.1362
A5YKK6	CCR4-NOT transcription complex subunit 1	CNOT1	266.939	0.000155394	0.919317	80.0081	69.5616	80.6576	69.2178	60.1198	64.5065	77.8908	59.4099	83.9686	83.5473	64.8823	66.0038
A6NC98	Coiled-coil domain-containing protein 88B	CCDC88B	164.809	0.000871598	0.869927	221.004	214.212	192.558	193.587	146.436	137.673	129.589	223.152	115.988	215.377	321.585	182.678
A6NCE7	Microtubule-associated proteins 1A/1B light chain 3 beta 2	MAP1LC3B2	14.628	0.00121724	0.857339	155.381	232.749	177.104	199.665	148.887	261.028	234.149	214.758	234.488		187.255	216.737
A6NCS6	Uncharacterized protein C2orf72	C2orf72	30.4807	0.000775819	0.872964	259.656	205.661	319.881	288.212	219.164	216.877	259.992	261.691	254.894	217.63	260.442	173.851
A6NDB9	Paralemmin-3	PALM3	71.6955	0.000449356	0.883809	70.2291	27.4982	85.2206	53.178		61.1179	110.307	45.6663	124.335	72.9834	80.3322	61.6268
A6NDG6	Glycerol-3-phosphate phosphatase	PGP	34.0061	9.2228e-05	0.936345	223.996	171.613	299.089	222.566	288.242	213.994	160.009	197.644	184.892	138.412	274.031	323.84
A6NDU8	UPF0600 protein C5orf51	C5orf51	33.6204	0.00200907	0.8126	47.2477	19.1034	77.0944	58.7783	55.1888	60.1345	69.8485	42.2435	33.8335	46.7703	34.8915	45.46
A6NED2	RCC1 domain-containing protein 1	RCCD1	40.0789	0.00577292	0.788105		16.595		40.7431	69.0546			37.9605	30.3855
A6NEQ0	RNA-binding motif protein, Y chromosome, family 1 member E	RBMY1E	55.7586	0.00308211	0.801274				21.4179				28.1333
A6NFQ2	TRPM8 channel-associated factor 2	TCAF2	100.906	0.000465773	0.883172	114.462	92.4012	124.315	94.6236	131.416	115.369	108.103	129.063	120.931	126.747	99.3974	112.504
A6NFY4	Nuclear envelope integral membrane protein 2	NEMP2	48.664	0.00228035	0.807768	17.6045		10.7261	25.5211		19.4035		21.1453	9.78885	23.9703		20.6731
A6NHL2	Tubulin alpha chain-like 3	TUBAL3	49.9087	9.37346e-05	0.935942	1147.32	1447.41	975.624	815.404	593.796	762.762	477.235	704.399	335.665	259.995	848.997	763.581
A6NHQ2	rRNA/tRNA 2'-O-methyltransferase fibrillarin-like protein 1	FBLL1	34.8034	0.000906606	0.86878		36.9796	58.3227		40.6967	48.5198	51.1399	25.2465	83.4002	35.0217	43.4603
A6NHR9	Structural maintenance of chromosomes flexible hinge domain-containing protein 1	SMCHD1	226.374	8.24204e-05	0.940952	104.83	105.29	106.854	102.503	89.6183	90.3592	100.803	101.607	106.191	109.794	117.104	99.1665
A6NHX0	Cytosolic arginine sensor for mTORC1 subunit 2	CASTOR2	36.0564	0.00499632	0.791563		105.579	85.69	93.0513	42.0612	89.4529			104.872		226.088	110.622
A6NI28	Rho GTPase-activating protein 42	ARHGAP42	98.569	0.000337271	0.888838	77.1956	107.642	50.3105	75.1921	61.112	55.912	69.8074	79.592	62.1875	69.6784	103.625	73.5928
A6NI72	Putative neutrophil cytosol factor 1B	NCF1B	44.817	0.00135651	0.833565	49.9223	37.5336	88.572	42.1931	29.545	44.0943	41.9096	26.3393	39.4005		46.1976	42.4888
A6NI79	Coiled-coil domain-containing protein 69	CCDC69	34.7963	0.000194215	0.903038	108.182	102.734	93.009	75.2738	100.027	108.226	108.907	114.253	134.439	93.1065	64.4267	74.4077
A6NIH7	Protein unc-119 homolog B	UNC119B	28.1366	0.00125664	0.855097	62.4015	69.2498	102.422	82.6658	65.4807	73.4395	66.2291	79.056	54.0224	57.1848	75.7978	73.1333
A6NJ78	12S rRNA N4-methylcytidine (m4C) methyltransferase	METTL15	46.121	0.00185194	0.816494	34.8563	51.9496	33.3422	57.351	64.4047	40.9108	26.9119	36.1875	43.3128	55.6259	30.9078	45.9156
A6NJG2	Ankyrin repeat domain-containing protein SOWAHD	SOWAHD	33.8031	0.000147686	0.922863	45.7622	48.0945	63.3995	71.0933	57.7953	45.1724	100.812	58.0098	62.3099	86.3137	70.1722	42.4821
A6NK58	Putative lipoyltransferase 2, mitochondrial	LIPT2	25.1953	0.00120806	0.857786	121.091	149.433	146.404	149.616	145.637	129.095	98.1409	117.285	123.196	138.143	140.761	103.315
A6NKD9	Coiled-coil domain-containing protein 85C	CCDC85C	45.2095	0.00978123	0.772963		7.30996		7.15814				7.01955		7.0074
A6NKG5	Retrotransposon-like protein 1	RTL1	155.048	0.00063083	0.877618	38.5871	55.0684	25.908	45.5383	38.8742	57.3624	41.2286	32.3191	32.6909	63.3141	27.1319	38.0684
A6NKQ9	Choriogonadotropin subunit beta variant 1	CGB1	20.468	0.000159976	0.915592	90.0769		138.758	84.7285		200.661		138.053	223.91	133.74		325.858
A6NKT7	RanBP2-like and GRIP domain-containing protein 3	RGPD3	197.487	7.07872e-05	0.957704	216.818	193.373	205.253	201.374	104.019	151.784	168.856	178.27	229.344	202.641	128.081	177.203
A6NMZ7	Collagen alpha-6(VI) chain	COL6A6	247.173	0.000401841	0.885708		24.2955				39.194		22.3338		25.8041	41.7529	33.4471
A6ZKI3	Retrotransposon Gag-like protein 8C	RTL8C	13.1711	0.0019784	0.813341	266.018	274.491		261.935	218.812	338.746	294.66	203.241		235.196	292.209	233.692
A7E2V4	Zinc finger SWIM domain-containing protein 8	ZSWIM8	197.297	0.00194232	0.814198	70.8412	56.3265	47.4887	78.479	49.7523	52.9229	41.2008	49.1658	46.6552	57.5124	57.8068	57.4642
A7KAX9	Rho GTPase-activating protein 32	ARHGAP32	230.529	0.00153773	0.824944		56.4933		23.1559	15.0267	10.0994	54.9923		36.1031	44.6931		42.5832
A8CG34	Nuclear envelope pore membrane protein POM 121C	POM121C	125.092	0.00133475	0.842338	53.3385	25.7142	32.1757	39.4584		36.8113	43.2631	46.3433	46.1989	64.9085	25.466	37.6205
A8MV65	Transcription cofactor vestigial-like protein 3	VGLL3	36.0089	0.00116474	0.859591	194.164	139.654	63.4592	128.476		88.9168	112.374	97.0676	125.798	182.157	138.353	87.4523
A8MVJ9	Putative histone PARylation factor 1-like		39.7217	0.000278333	0.892664	27.2111	107.276		125.593	15.725	21.0365			34.16		36.8006	51.3853
A8MVW0	Protein FAM171A2	FAM171A2	87.435	0.00438969	0.79449				8.83131		15.6166						6.34654
A8MW92	PHD finger protein 20-like protein 1	PHF20L1	115.01	0.00662751	0.784635									38.5173	96.6193
A8MWD9	Putative small nuclear ribonucleoprotein G-like protein 15	SNRPGP15	8.54404	0.000320295	0.889826	222.807	209.432	257.953	234.158	180.242	162.19	197.475	191.025	177.759	233.706	199.737	184.8
A8MXV4	Acyl-coenzyme A diphosphatase NUDT19	NUDT19	42.2333	0.000157416	0.917596	48.6325	92.632	92.9843	43.8577	43.7109	63.7461	43.1999	45.8256	59.1905	65.2756	60.1191	43.1727
A9UHW6	MIF4G domain-containing protein	MIF4GD	25.4232	0.0012747	0.853889	59.5985	80.5638	60.5812	65.2881	75.6983	81.3652	77.1676	45.1986	60.0635	49.5319	54.4925	54.4787
B0I1T2	Unconventional myosin-Ig	MYO1G	116.442	0.000725982	0.874562	53.7075	33.649	74.3998	59.6619	49.362	32.1161	106.085	42.1087	48.922	44.608	34.6777	50.082
B2RUZ4	Small integral membrane protein 1	SMIM1	8.74912	0.000152814	0.920642	145.117	93.5259	96.4407	92.9195	134.275	90.3569	140.621	106.601	130.919	176.407	102.407	26.3916
B4DXR9	Zinc finger protein 732	ZNF732	67.8394	0.000953185	0.867229	108.372	114.708		96.0277	136.186	88.474	82.7467	113.19	128.736	106.859		102.336
B5ME19	Eukaryotic translation initiation factor 3 subunit C-like protein	EIF3CL	105.473	7.07872e-05	0.952742	339.791	381.558	431.251	362.696	322.824	374.049	343.21	414.656	462.322	447.082	364.577	349.343
B7ZAP0	Rab GTPase-activating protein 1-like, isoform 10	RABGAP1L	29.0379	0.00010325	0.933474	69.277	71.6734	52.8811	66.4091	55.4706	59.4068	48.6985	65.7765	71.2491	77.361	71.4748	52.4132
B7ZAQ6	Golgi pH regulator A	GPR89A	52.917	0.000142648	0.92452	81.8783	46.7642	44.6669	38.2115	66.3792	33.9484	28.4534	53.0474	44.0554	37.8837	61.92	32.7805
B9A064	Immunoglobulin lambda-like polypeptide 5	IGLL5	23.0632	0.000171156	0.910406	753.263	772.187	1006.55	467.855	462.979	237.584	877.201	544.808	325.135	225.016	723.577	754.927
C4AMC7	Putative WAS protein family homolog 3	WASH3P	49.9945	7.07872e-05	0.958361	206.338	234.744	163.175	229.278	193.472	164.61	230.219	210.567	213.191	217.179	234.223	186.861
C9JLW8	Mapk-regulated corepressor-interacting protein 1	MCRIP1	10.9202	0.00011909	0.929917	233.32	226.835	345.017	276.118	198.046	202.028	355.188	218.11	233.509	277.473	215.157	239.222
C9JVW0	Putative transmembrane protein INAFM1	INAFM1	14.6679	0.0018069	0.817587
E9PAV3	Nascent polypeptide-associated complex subunit alpha, muscle-specific form	NACA	205.422	4.22067e-05	0.967026	383.402	334.988	453.533	385.707	390.252	361.106	411.866	409.764	480.445	449.057	463.698	368.81
E9PRG8	Uncharacterized protein C11orf98	C11orf98	14.2337	0.00108904	0.862549	129.168	102.041	143.475	135.274	149.787	109.403	100.342	73.8537	98.8373	112.917	90.559	103.892
L0R6Q1	SLC35A4 upstream open reading frame protein	SLC35A4	11.1328	0.000417056	0.885081	500.191	419.326	384.05	552.511	254.881	345.351	489.81	491.905	384.733	591.456	358.46	250.94
L0R819	ASNSD1 upstream open reading frame protein	ASDURF	11.2498	0.000679261	0.876079	54.689	84.4184		65.8889	61.0757	58.9174	89.4643	76.5456	57.956	52.7554	85.323	85.9023
M5A8F1	Suppressyn	ERVH48-1	18.128	0.000171875	0.910162	110.534	76.4154	89.2747	81.603	131.766	75.9474	48.7523	78.1642	66.5751	88.684	68.9161	80.5155
O00115	Deoxyribonuclease-2-alpha	DNASE2	39.5808	0.00011809	0.930234		139.999	174.739	149.118	176.655	172.494	201.676	113.883	66.2056	107.355	173.255	168.786
O00116	Alkyldihydroxyacetonephosphate synthase, peroxisomal	AGPS	72.9118	2.0796e-05	0.970526	120.618	104.675	130.789	88.9851	97.1017	96.7217	101.407	90.4748	91.8697	105.429	84.7684	92.2348
O00124	UBX domain-containing protein 8	UBXN8	30.5411	0.00197811	0.813353		11.7118		10.4631	17.9945				9.46559			19.3169
O00139	Kinesin-like protein KIF2A	KIF2A	79.9545	7.23262e-05	0.949084	225.069	213.912	305.256	216.728	176.369	201.825	207.134	222.965	294.872	313.309	189.632	177.385
O00142	Thymidine kinase 2, mitochondrial	TK2	31.0048	0.000167961	0.91167	151.323	133.608	122.361	124.417	165.335	157.597	134.045	122.524	94.9471	98.8423	142.653	108.179
O00148	ATP-dependent RNA helicase DDX39A	DDX39A	49.1295	0.00026092	0.894049	129.243	87.0595	112.642	147.17	111.466	127.085	98.0271	96.1367	164.067	136.585	157.257	153.686
O00151	PDZ and LIM domain protein 1	PDLIM1	36.0717	7.18515e-05	0.950195	302.694	280.037	192.08	270.29	254.691	287.88	267.437	219.872	222.578	168.152	263.588	292.154
O00154	Cytosolic acyl coenzyme A thioester hydrolase	ACOT7	41.796	5.12188e-05	0.965678	128.366	120.663	97.7888	141.976	157.559	221.296	228.136	182.122	263.356	285.203	211.223	170.995
O00159	Unconventional myosin-Ic	MYO1C	121.682	4.63969e-05	0.966404	409.455	392.418	359.52	374.775	329.961	394.939	382.441	367.729	304.318	353.823	274.564	283.768
O00160	Unconventional myosin-If	MYO1F	124.844	0.000314649	0.890158	110.232	92.1999	128.777	87.4875	101.719	94.7531	108.386	86.7223	94.7148	72.5615	94.1596	77.3591
O00161	Synaptosomal-associated protein 23	SNAP23	23.354	7.07872e-05	0.952531	166.681	148.105	171.503	151.944	136.945	130.223	167.05	186.274	174.26	211.878	151.999	148.204
O00165	HCLS1-associated protein X-1	HAX1	31.6205	0.00108831	0.862581	77.6801	86.7901	96.4895	73.5918	76.0896	85.6884	77.4616	92.8141	94.2026	132.884	63.2234	93.4371
O00170	AH receptor-interacting protein	AIP	37.636	7.30482e-05	0.948273	146.397	143.919	124.478	163.652	142.919	153.621	167.217	164.029	164.766	167.878	142.895	166.822
O00178	GTP-binding protein 1	GTPBP1	72.4538	9.50019e-05	0.935563	89.6973	79.4398	97.6774	90.2212	107.614	100.82	84.8057	90.4352	106.191	107.579	80.529	103.368
O00182	Galectin-9	LGALS9	39.5182	0.000129534	0.927838	105.427	129.92	201.335	78.2701	137.958	147.265	201.905	99.1163	83.052	125.47	103.247	101.138
O00186	Syntaxin-binding protein 3	STXBP3	67.7643	9.43909e-05	0.935698	159.232	166.815	168.012	159.507	141.936	148.859	157.509	174.201	167.387	169.28	145.876	144.728
O00187	Mannan-binding lectin serine protease 2	MASP2	75.7024	0.00132201	0.847986	164.977	134.721	142.089	93.312	127.937	154.387	152.057	157.068	96.3466	108.664	196.265	112.004
O00189	AP-4 complex subunit mu-1	AP4M1	49.977	0.00132953	0.844452	63.6704	31.2389	33.2915	57.3536	65.6526	43.9671	43.0442	44.9337	34.535	66.1751		26.6916
O00192	Armadillo repeat protein deleted in velo-cardio-facial syndrome	ARVCF	104.642	0.00147831	0.826858	26.4226	4.7377		22.9613	17.7467	16.2048	21.0525	21.3226	15.5229	17.0361	23.0925	15.5695
O00193	Small acidic protein	SMAP	20.3325	7.1388e-05	0.951037	102.681	107.863	26.6486	127.239	77.4309	69.2024	73.38	60.8355	104.393	94.3703	77.264	108.972
O00194	Ras-related protein Rab-27B	RAB27B	24.6078	0.00138823	0.830827	616.385	554.837	580.377	526.576	609.525	547.302	562.676	520.78	51.1333	402.086	447.969	367.131
O00203	AP-3 complex subunit beta-1	AP3B1	121.32	2.12023e-05	0.970434	177.357	189.201	160.89	197.043	174.737	178.139	183.762	210.502	230.391	210.141	213.439	175.661
O00204	Sulfotransferase 2B1	SULT2B1	41.3077	7.07872e-05	0.952785	84.8824	86.4605	116.719	139.125	61.9617	96.8527	86.872	150.657	182.979	138.747	60.1277	112.894
O00212	Rho-related GTP-binding protein RhoD	RHOD	23.4128	0.000839141	0.87096	100.802	96.2043	97.078	120.523	72.4202	95.791	97.7388	96.2856	123.17	105.975	100.799	87.1801
O00214	Galectin-8	LGALS8	35.8081	0.000118688	0.930036	203.826	205.438	203.27	192.02	168.702	187.921	170.121	228.152	224.166	252.873	166.092	153.771
O00217	NADH dehydrogenase [ubiquinone] iron-sulfur protein 8, mitochondrial	NDUFS8	23.7051	8.13411e-05	0.941686	240.869	253.433	311.408	247.997	312.078	239.752	250.415	212.928	277.168	280.396	200.248	204.988
O00231	26S proteasome non-ATPase regulatory subunit 11	PSMD11	47.4638	7.07872e-05	0.956656	256.512	297.815	256.799	275.298	289.544	300.449	258.106	314.741	306.353	345.617	330.714	281.2
O00232	26S proteasome non-ATPase regulatory subunit 12	PSMD12	52.9044	0.000138168	0.925771	243.907	252.993	271.642	285.288	294.241	286.809	289.701	307.422	261.651	338.581	352.793	226.331
O00233	26S proteasome non-ATPase regulatory subunit 9	PSMD9	24.6818	7.07872e-05	0.954402	152.576	120.901	139.889	132.866	131.869	140.738	140.959	136.911	124.481	105.916	152.43	128.604
O00244	Copper transport protein ATOX1	ATOX1	7.40162	7.81919e-05	0.944465	155.135	100.361	144.064	202.989	157.308	165.775	238.161	103.917	131.842	72.2461	99.9437	246.861
O00255	Menin	MEN1	68.0234	0.00304042	0.801523	101.548	109.608		112.188	109.672	63.9949	107.305	59.0351		64.3328		53.3116
O00264	Membrane-associated progesterone receptor component 1	PGRMC1	21.6712	7.07872e-05	0.957737	524.613	453.818	435.943	381.865	410.505	398.893	493.853	404.719	414.931	456.707	464.877	398.642
O00267	Transcription elongation factor SPT5	SUPT5H	121	7.58901e-05	0.946276	168.04	121.199	108.844	129.89	81.573	94.6267	119.567	102.348	118	130.714	122.845	133.494
O00268	Transcription initiation factor TFIID subunit 4	TAF4	110.114	0.000179935	0.907293	39.8209			17.3664	50.9194		36.0968	17.2165	24.4247	31.8943	17.8676	33.0119
O00273	DNA fragmentation factor subunit alpha	DFFA	36.5219	0.000687599	0.875815	91.7871	96.7819	96.3659	139.229	149.645	134.316	117	107.892	116.296	108.38	133.216	165.523
O00291	Huntingtin-interacting protein 1	HIP1	116.221	7.17034e-05	0.950478	145.968	141.613	113.142	128.19	115.241	139.772	111.397	103.137	101.337	86.647	111.898	105.715
O00292	Left-right determination factor 2	LEFTY2	40.9202	0.00131251	0.850056
O00299	Chloride intracellular channel protein 1	CLIC1	26.9227	7.07872e-05	0.951823	711.69	631.884	846.505	925.526	979.856	848.834	791.743	600.838	754.753	395.855	751.083	1193.42
O00303	Eukaryotic translation initiation factor 3 subunit F	EIF3F	37.5639	3.03771e-05	0.968885	281.526	315.804	400.161	291.603	285.553	292.508	308.138	334.201	373.861	415.675	322.983	263.523
O00308	NEDD4-like E3 ubiquitin-protein ligase WWP2	WWP2	98.912	0.00132745	0.845774	70.6164	65.8868	48.9687	62.0486	62.499	63.2379	84.3489	64.5469	77.8421	79.538	54.5016	81.0005
O00327	Aryl hydrocarbon receptor nuclear translocator-like protein 1	ARNTL	68.7618	0.00591277	0.787514	419.749						134.199	54.1953			220.16	234.134
O00329	Phosphatidylinositol 4,5-bisphosphate 3-kinase catalytic subunit delta isoform	PIK3CD	119.479	0.00174131	0.819261	117.344	78.7737	9.23073	67.7281	104.767		84.5307	20.3572			98.0156	100.104
O00330	Pyruvate dehydrogenase protein X component, mitochondrial	PDHX	54.1223	7.07872e-05	0.958684	128.795	160.197	133.271	159.594	120.55	139.29	131.487	151.276	128.973	172.616	110.578	103.165
O00339	Matrilin-2	MATN2	106.837	7.35348e-05	0.948039	86.1334	152.87	126.928	69.8648	90.9224	117.882	69.0804	62.1999	56.4187	54.7098	97.1021	80.5779
O00370	LINE-1 retrotransposable element ORF2 protein		149.012	0.00716482	0.782544			50.8708	28.9751		21.5197	48.2496
O00391	Sulfhydryl oxidase 1	QSOX1	82.5777	7.07872e-05	0.954373	144.656	113.172	96.0811	70.7727	122.454	83.7003	213.132	84.4595	107.321	58.0506	501.404	202.341
O00399	Dynactin subunit 6	DCTN6	20.747	8.0436e-05	0.942275	188.843	211.181	179.706	193.495	195.679	175.021	143.231	194.592	195.725	199.148	191.96	161.016
O00400	Acetyl-coenzyme A transporter 1	SLC33A1	60.909	0.000186045	0.905217	97.301	92.214	113.517	85.2386	97.0353	88.6473	119.184	105.903	97.2208	97.0969	62.8766	79.3671
O00401	Neural Wiskott-Aldrich syndrome protein	WASL	54.827	0.00022763	0.897582	115.121	103.919	74.6309	134.319	102.075	114.775	121.787	117.083	114.551	111.664	106.496	120.209
O00410	Importin-5	IPO5	123.63	7.07872e-05	0.951709	104.096	95.3113	106.355	118.789	136.21	133.101	101.079	104.94	110.516	106.081	136.725	123.839
O00411	DNA-directed RNA polymerase, mitochondrial	POLRMT	138.62	0.00145086	0.827927	22.903	26.3581	34.2357	33.164	34.0428	34.3231	36.9803	24.8297	25.3773	25.415	29.6132	16.9454
O00422	Histone deacetylase complex subunit SAP18	SAP18	17.5611	0.000107801	0.932524	71.6012	87.442	58.5797	58.6304	43.0925	37.4577	49.1731	61.0579	41.844	53.2006	47.512	48.0299
O00423	Echinoderm microtubule-associated protein-like 1	EML1	89.8609	7.07872e-05	0.956083	118.829	155.97	123.229	182.269	152.173	151.173	127.529	154.807	134.775	101.236	128.528	163.484
O00425	Insulin-like growth factor 2 mRNA-binding protein 3	IGF2BP3	63.705	7.5428e-05	0.946524	295.1	309.491	524.256	360.07	348.294	338.645	280.403	451.076	587.167	519.054	241.485	414.429
O00429	Dynamin-1-like protein	DNM1L	81.8772	9.89815e-06	0.973189	124.667	157.661	127.108	144.24	131.742	164.816	131.654	133.492	142.235	136.888	147.571	169.575
O00442	RNA 3'-terminal phosphate cyclase	RTCA	39.3367	8.34984e-05	0.940076	152.652	123.712	134.65	154.915	163.868	156.074	168.512	126.103	142.987	128.353	151.786	158.898
O00443	Phosphatidylinositol 4-phosphate 3-kinase C2 domain-containing subunit alpha	PIK3C2A	190.68	0.000126137	0.928558	82.3077	79.1553	88.4061	96.6794	91.4345	95.3963	78.2481	74.4204	130.143	105.956	67.1152	91
O00451	GDNF family receptor alpha-2	GFRA2	51.5436	0.000913777	0.868524	53.7309	22.2947		47.0494	98.0526	16.5806			42.24		36.7811	25.1307
O00453	Leukocyte-specific transcript 1 protein	LST1	10.7924	0.00876363	0.776522	336.318			259.761			294.291
O00459	Phosphatidylinositol 3-kinase regulatory subunit beta	PIK3R2	81.5453	0.0010284	0.864656	52.4976	39.6288		55.2413	53.2524	54.9869	44.3828	52.8612	32.2521	41.4929	95.1248	60.1981
O00461	Golgi integral membrane protein 4	GOLIM4	81.8803	0.00012079	0.929548	99.7237	94.1217	98.5484	98.3233	133.106	119.901	124.098	95.7505	99.7114	115.49	84.4785	98.1061
O00468	Agrin	AGRN	217.32	2.62067e-05	0.969521	106.216	149.534	123.421	95.6532	101.924	106.596	184.874	100.556	75.0679	87.2091	168.728	108.497
O00469	Procollagen-lysine,2-oxoglutarate 5-dioxygenase 2	PLOD2	84.6856	6.53297e-05	0.962897	254.803	160.031	193.294	137.602	122.946	165.606	206.721	142.033	107.355	124.861	185.839	193.346
O00470	Homeobox protein Meis1	MEIS1	43.0161	0.00147706	0.826901	52.0938	17.7542			34.8135	54.9088	33.2947		31.0651		64.7109	50.0227
O00471	Exocyst complex component 5	EXOC5	81.8529	7.07872e-05	0.958217	125.02	160.637	127.659	140.516	139.794	146.15	142.216	165.39	150.867	167.988	135.844	133.183
O00478	Butyrophilin subfamily 3 member A3	BTN3A3	65.002	0.000191016	0.903807	59.8437	77.7102	96.4275	85.3262	102.295	109.431	81.8994	100.404	87.2281	80.0218	94.345	91.357
O00479	High mobility group nucleosome-binding domain-containing protein 4	HMGN4	9.53891	7.42676e-05	0.947517	1497.69	1562.14	1453.65	1538.51	1119.76	970.532	917.845	1226.36	587.046	1260.58	1118.21	983.623
O00481	Butyrophilin subfamily 3 member A1	BTN3A1	57.6772	0.00145283	0.827824		78.9236				75.2663	59.4779
O00483	Cytochrome c oxidase subunit NDUFA4	NDUFA4	9.36986	8.56881e-05	0.939008	335.47	354.203	313.92	330.866	373.152	374.521	403.125	306.419	264.258	357.23	192.591	246.626
O00487	26S proteasome non-ATPase regulatory subunit 14	PSMD14	34.577	7.88382e-05	0.944154	127.869	146.719	138.398	131.492	152.311	162.559	135.172	156.367	137.121	149.858	165.145	142.677
O00488	Zinc finger protein 593	ZNF593	15.1991	0.00144089	0.828356	54.5097		32.7267	49.5555	50.6687	48.2197	55.7972		71.3481	52.976		56.8816
O00499	Myc box-dependent-interacting protein 1	BIN1	64.6994	7.37486e-05	0.947749	93.8776	117.107	83.5538	122.801	118.314	160.326	178.362	108.259	104.4	85.9443	151.535	144.363
O00501	Claudin-5	CLDN5	23.1474	0.000288852	0.891916	16.8318	5.12581	8.6026	14.1247	11.8977	11.6769		17.7989	10.9455	42.8745	5.98169	11.3745
O00505	Importin subunit alpha-4	KPNA3	57.8109	3.48764e-05	0.968257	144.984	171.646	151.591	162.091	160.978	140.367	138.28	181.399	166.675	149.789	157.433	156.238
O00515	Ladinin-1	LAD1	57.1311	0.000156697	0.918203	167.86	112.074	119.48	93.4119	60.2844	136.649	72.4635	143.716	157.874	157.713	107.727	94.5564
O00519	Fatty-acid amide hydrolase 1	FAAH	63.0658	7.07872e-05	0.952955	110.579	158.682	43.8768	101.657	129.741	112.104	88.3974	143.143	126.738	116.344	105.243	103.076
O00522	Krev interaction trapped protein 1	KRIT1	84.3481	0.00616864	0.78646	64.6507			142.2	19.9342	40.5798	32.9956	53.7931	27.0058	28.4096		25.9467
O00534	von Willebrand factor A domain-containing protein 5A	VWA5A	86.4893	7.07872e-05	0.954494	114.624	108.866	78.1124	101.622	85.0535	128.798	126.543	114.048	131.164	135.957	92.1423	155.766
O00541	Pescadillo homolog	PES1	68.0026	0.00014821	0.922544	81.4813	83.0978	58.4743	59.5555	71.0706	65.23	35.4606	54.6632	58.5528	80.8921	62.0454	62.2048
O00560	Syntenin-1	SDCBP	32.4444	3.09345e-05	0.968781	321.752	306.198	436.836	261.64	259.154	278.528	211.222	274.258	239.122	317.936	249.572	231.967
O00562	Membrane-associated phosphatidylinositol transfer protein 1	PITPNM1	134.848	0.000375797	0.886897	74.1875	60.2183	60.4593	68.7232	62.3437	62.1609	81.9855	67.618	72.3467	70.947	52.0618	61.3006
O00566	U3 small nucleolar ribonucleoprotein protein MPP10	MPHOSPH10	78.8638	0.00210127	0.810659	21.5613	23.6753				5.76278			25.0225	18.3226		12.1104
O00567	Nucleolar protein 56	NOP56	66.0499	8.29451e-05	0.940564	215.541	195.343	178.217	240.793	222.973	197.21	212.012	234.37	197.987	200.688	146.217	181.84
O00571	ATP-dependent RNA helicase DDX3X	DDX3X	73.2434	3.42471e-05	0.968379	310.282	286.595	295.884	275.016	231.708	258.002	276.081	271.734	337.047	325.575	226.466	324.489
O00584	Ribonuclease T2	RNASET2	29.4808	0.000193275	0.903267	50.0741	61.6837	36.1113	40.3694	39.1068	46.3789	50.8896	36.1346	56.6268	17.1582	54.615	71.3157
O00592	Podocalyxin	PODXL	58.6352	7.52784e-05	0.946632	412.554	437.741	605.569	479.319	662.664	480.175	556.394	415.774	404.47	317.998	290.007	253.973
O00602	Ficolin-1	FCN1	35.0784	0.000524626	0.881108	92.4021	32.8719	114.538	200.71	126.061	128.014	111.395	140.137	124.204	234.21	133.373	94.6368
O00625	Pirin	PIR	32.1134	0.000122027	0.929327	94.2349	83.4873	105.507	158.895	101.198	106.484	163.281	94.3061	88.8123	90.852	77.5106	165.127
O00629	Importin subunit alpha-3	KPNA4	57.8867	0.000113444	0.931226	125.201	122.108	136.441	79.4519	123.898	143.299	137.342	196.503	236.925	140.193	99.671	138.84
O00635	E3 ubiquitin-protein ligase TRIM38	TRIM38	53.4158	0.00125829	0.855004	35.8797	35.9024		30.2767		46.8498	66.2646	45.7242	41.846	27.2482	39.1094	41.8851
O00712	Nuclear factor 1 B-type	NFIB	47.4419	0.00492757	0.791893	53.8857			60.7283	34.3211	52.8656	65.1749					74.199
O00743	Serine/threonine-protein phosphatase 6 catalytic subunit	PPP6C	35.1443	7.23262e-05	0.949471	116.635	158.305	167.183	119.81	136.177	119.502	127.612	150.18	122.164	115.802	125.654	134.775
O00746	Nucleoside diphosphate kinase, mitochondrial	NME4	20.6586	0.00125254	0.855423	59.1933	47.8513	26.8239	65.3237	31.0972	55.4043	21.3733	50.4915	45.3412	43.8065		47.2509
O00750	Phosphatidylinositol 4-phosphate 3-kinase C2 domain-containing subunit beta	PIK3C2B	184.768	0.000456887	0.883515	24.9785	46.1321	31.9624	45.034	26.1388	38.1621	30.3624	36.8451	34.9954	48.5639	20.6307	47.4288
O00754	Lysosomal alpha-mannosidase	MAN2B1	113.744	7.07872e-05	0.956906	192.073	197.149	182.035	105.093	220.321	227.303	175.58	195.821	181.803	193.621	192.814	221.685
O00764	Pyridoxal kinase	PDXK	35.1023	7.07872e-05	0.957482	267.986	223.351	374.065	327.221	251.84	302.857	341.497	242.66	290.608	170.857	350.382	396.18
O14493	Claudin-4	CLDN4	22.0773	0.000604295	0.878479	209.189	212.599	306.144			206.051		235.231			229.502	189.765
O14494	Phospholipid phosphatase 1	PLPP1	32.1561	9.34616e-05	0.936043	65.1749	79.5496	59.9882	38.1769	50.1289	58.3913	132.987	56.833	49.8063	54.2389	70.034	47.4791
O14495	Phospholipid phosphatase 3	PLPP3	35.116	7.07872e-05	0.953555	288.415	269.117	230.12	217.61	194.679	238.326	269.574	278.727	208.595	284.228	229.202	182.002
O14497	AT-rich interactive domain-containing protein 1A	ARID1A	242.045	0.000173883	0.909536	116.201	78.3686	64.4515	104.217	64.189	58.3844	70.1187	55.8672	60.4918	87.332	92.4322	101.195
O14498	Immunoglobulin superfamily containing leucine-rich repeat protein	ISLR	45.9973	8.79844e-05	0.937909	230	117.952		117.465	271.56	314.728	1269.6	80.6157	132.021	59.5991	703.704	151.801
O14519	Cyclin-dependent kinase 2-associated protein 1	CDK2AP1	12.365	0.000155839	0.918841	71.8291	68.9235	39.6109	73.6397	55.1104	40.188	40.7841	62.5345	54.2734	63.0622	48.472	51.1161
O14521	Succinate dehydrogenase [ubiquinone] cytochrome b small subunit, mitochondrial	SDHD	17.043	0.00132003	0.848796	396.869	225.854	358.683	320.178	458.57	234.786	349.867	339.429	303.894	253.386	280.941	190.833
O14524	Nuclear envelope integral membrane protein 1	NEMP1	50.64	0.000135631	0.926434	284.339	393.372	369.316	201.566	59.9193	198.864	239.619	235.332	212.056	238.281	158.37	182.445
O14530	Thioredoxin domain-containing protein 9	TXNDC9	26.534	0.000278783	0.892622	62.0326	73.8357	57.8641	62.5149	71.8195	65.6082	41.9516	64.1478	49.7295	41.2179	58.1831	65.1913
O14531	Dihydropyrimidinase-related protein 4	DPYSL4	61.8776	0.0013361	0.838523	3537.09	4780.35	3118.48	5039.72	4959.57	4475.28	5787.56	4075.75	3633.98	3163.37
O14544	Suppressor of cytokine signaling 6	SOCS6	59.528	0.00133803	0.837351				81.1367				88.9013			96.6214
O14545	TRAF-type zinc finger domain-containing protein 1	TRAFD1	64.841	0.00145108	0.827911		21.664		19.109				11.9335				29.7692
O14548	Cytochrome c oxidase subunit 7A-related protein, mitochondrial	COX7A2L	12.6147	0.000162585	0.914074	276.108	314.903	332.031	347.092	370.953	279.43	308.837	243.386	298.86	365.962	202.534	250.771
O14558	Heat shock protein beta-6	HSPB6	17.1356	7.07872e-05	0.954309	558.424	912.942	313.91	432.035	679.114	1216.82	2297.75	267.166	370.436	336.803	970.706	386.19
O14561	Acyl carrier protein, mitochondrial	NDUFAB1	17.4173	7.07872e-05	0.954364	579.081	614.492	725.115	671.04	661.464	602.85	614.008	617.845	558.073	634.656	436.396	490.784
O14562	Ubiquitin domain-containing protein UBFD1	UBFD1	33.3819	0.00108125	0.862814	219.324	215.831	203.294	263.069	224.102	238.28	254.426	218.955	232.646	205.877	256.046	252.157
O14569	Transmembrane reductase CYB561D2	CYB561D2	23.9737	8.1035e-05	0.941933	441.291	437.185	436.983	409.754	490.839	347.274	442.581	478.127	424.721	543.851	223.349	303.723
O14579	Coatomer subunit epsilon	COPE	34.482	7.07872e-05	0.959775	179.882	179.934	224.758	203.826	246.82	218.221	191.225	219.26	216.947	218.248	230.842	206.853
O14602	Eukaryotic translation initiation factor 1A, Y-chromosomal	EIF1AY	16.4424	8.22997e-05	0.941049	267.61	192.723	317.208	312.081	332.288	273.003	311.251	239.038	274.861	296.224	199.841	278.413
O14617	AP-3 complex subunit delta-1	AP3D1	130.158	7.07872e-05	0.957022	133.993	153.039	128.669	150.791	117.07	139.136	128.035	151.398	158.05	156.671	147.827	132.507
O14618	Copper chaperone for superoxide dismutase	CCS	29.0406	0.00126094	0.854808	49.7124	68.6636		61.9011	75.8392	2.48325			39.0134		65.3039	75.1401
O14639	Actin-binding LIM protein 1	ABLIM1	87.6875	8.67852e-05	0.938524	103.326	108.736	77.747	122.711	109.109	95.5801	94.2881	94.4055	81.2466	100.292	63.2222	86.6902
O14640	Segment polarity protein dishevelled homolog DVL-1	DVL1	75.1868	0.0058095	0.78795		122.754		167.374	4.89724	178.129		121.29	142.564	128.604	219.318	119.734
O14641	Segment polarity protein dishevelled homolog DVL-2	DVL2	78.9479	0.000340608	0.888651	57.0236	49.3937	22.4621	60.9187	51.6362	55.3252	49.3712	36.043	43.3579	52.5388	41.978	37.647
O14646	Chromodomain-helicase-DNA-binding protein 1	CHD1	196.688	0.000231997	0.89705	68.204	34.7546	61.2119	76.7201	17.8587	43.1532	45.6222	54.3243	52.3086	53.4126	37.9993	61.4379
O14647	Chromodomain-helicase-DNA-binding protein 2	CHD2	211.344	0.000177612	0.908164	72.5472	61.662	50.1331	75.6273	37.8491	51.4266	58.76	61.5115	65.575	74.3596	53.3805	62.9401
O14653	Golgi SNAP receptor complex member 2	GOSR2	24.7754	8.45824e-05	0.939666	120.281	130.039	139.014	143.164	129.057	126.437	143.834	111.377	132.865	138.005	75.1972	128.339
O14656	Torsin-1A	TOR1A	37.8087	9.54946e-05	0.935388	192.155	224.069	179.827	223.709	223.123	228.458	211.936	254.832	235.298	276.507	216.992	220.361
O14657	Torsin-1B	TOR1B	37.9789	0.00100615	0.865426	171.359	151.122	203.888	175.95	194.969	163.485	199.733	148.131	183.336	136.199	157.781	186.231
O14662	Syntaxin-16	STX16	37.0312	7.25257e-05	0.948888	169.531	165.769	147.419	156.369	165.19	163.987	161.819	152.115	192.186	175.694	113.659	136.015
O14672	Disintegrin and metalloproteinase domain-containing protein 10	ADAM10	84.1421	5.37476e-05	0.965252	132.38	138.65	143.669	113.927	129.943	130.205	113.397	130.808	166.443	161.193	112.556	118.686
O14678	Lysosomal cobalamin transporter ABCD4	ABCD4	68.5974	0.0013208	0.848613	27.593	27.6354	19.9767	21.9767	23.91	22.8578	19.7068	21.857	31.3641	27.8832		15.4582
O14681	Etoposide-induced protein 2.4 homolog	EI24	38.9647	0.000168087	0.911618	67.1306	60.9356	28.0592	41.6469	61.3891	27.4141		32.6699	24.2991	35.8584	51.7143	32.809
O14683	Tumor protein p53-inducible protein 11	TP53I11	21.0539	0.000248202	0.895231	59.4577	56.6983	36.9052	58.2562	45.1585	45.3591	56.0536	61.5286	64.6178	51.5858	68.5663	36.4817
O14684	Prostaglandin E synthase	PTGES	17.1023	7.07872e-05	0.954271	837.444	617.994	813.16	462.949	597.295	425.194	673.197	405.447	640.189	436.434	1456.93	798.198
O14713	Integrin beta-1-binding protein 1	ITGB1BP1	21.7825	0.00345697	0.799176	28.2278		15.3721	19.8435		46.6878		35.6069		36.2058	13.8216	13.9527
O14727	Apoptotic protease-activating factor 1	APAF1	141.84	0.0019588	0.8138	28.8975	20.1708		24.3516	36.5909	43.3738	56.6953	33.5169	16.0653	19.3475	32.0908	24.4112
O14730	Serine/threonine-protein kinase RIO3	RIOK3	59.093	0.00268066	0.80392	59.5802	75.1365	49.7176							64.504		49.0664
O14732	Inositol monophosphatase 2	IMPA2	31.3209	0.000140153	0.92522	182.854	122.373	279.644	184.447	148.367	190.332	225.89	126.98	131.598	104.808	181.053	156.247
O14733	Dual specificity mitogen-activated protein kinase kinase 7	MAP2K7	47.4849	0.00116306	0.859672	119.522	120.678	106.61	99.451	116.383	126.718	96.1844	120.789	112.68	121.806	85.5634	82.4415
O14734	Acyl-coenzyme A thioesterase 8	ACOT8	35.9142	0.000910153	0.868658	100	91.9507	91.0391	79.6479	68.3323	74.7124	95.9443	79.7923	56.0418	82.5171	41.811	70.8505
O14735	CDP-diacylglycerol--inositol 3-phosphatidyltransferase	CDIPT	23.5388	7.07872e-05	0.957563	371.006	391.803	419.732	283.865	337.587	239.627	359.555	304.221	292.527	348.191	299.243	236.911
O14737	Programmed cell death protein 5	PDCD5	14.2851	0.000153446	0.920358	161.945	143.737	117.433	186.222	180.706	186.442	194.786	163.954	174.252	156.017	151.304	210.94
O14744	Protein arginine N-methyltransferase 5	PRMT5	72.6839	6.80559e-05	0.961908	190.844	164.746	199.99	179.934	206.993	156.069	168.053	192.571	186.036	265.168	250.579	108.373
O14745	Na(+)/H(+) exchange regulatory cofactor NHE-RF1	SLC9A3R1	38.8684	4.4845e-05	0.966658	286.413	206.678	365.857	282.921	275.599	301.866	287.791	334.129	364.351	334.478	338.122	284.946
O14756	17-beta-hydroxysteroid dehydrogenase type 6	HSD17B6	35.9657	0.0068232	0.783868		118.088					117.473
O14772	Fucose-1-phosphate guanylyltransferase	FPGT	68.0095	0.000938603	0.867711	53.6506	29.6542	61.1533	65.9995	62.8243	53.2803	61.2354		49.2694	49.525	73.9673	75.0112
O14773	Tripeptidyl-peptidase 1	TPP1	61.2479	6.72261e-05	0.962254	322.066	252.763	415.958	271.361	273.167	321.5	282.677	256.13	289.975	327.663	164.709	265.698
O14776	Transcription elongation regulator 1	TCERG1	123.901	4.62646e-05	0.966458	172.171	122.073	93.7688	136.716	95.413	90.2021	113.004	97.8765	109.579	125.786	168.383	141.455
O14786	Neuropilin-1	NRP1	103.134	3.4152e-07	0.980583	146.689	161.772	155.237	137.191	161.997	156.773	142.553	164.907	137.785	144.964	152.047	111.479
O14787	Transportin-2	TNPO2	101.388	0.000139804	0.925349	146.631	145.176	141.88	143.4	149.833	130.801	140.402	127.837	154.535	159.025	115.843	125.42
O14791	Apolipoprotein L1	APOL1	43.9742	8.79891e-05	0.937891	117.107	113.603	103.13	112.124	94.986	80.6508	151.39	120.644	81.2709	68.9994	157.214	107.372
O14798	Tumor necrosis factor receptor superfamily member 10C	TNFRSF10C	27.4068	0.00140682	0.829903	14.8374	18.0506	21.7068	16.1483	21.4178	8.90833	25.204	27.9239	17.1523	56.0864	33.0156
O14802	DNA-directed RNA polymerase III subunit RPC1	POLR3A	155.641	0.000210291	0.899973	59.9073	63.0972	77.7852	68.6942	65.8979	36.8736	69.2442	64.7445	71.5139	64.6451	74.2969	62.2499
O14807	Ras-related protein M-Ras	MRAS	23.8465	0.00292107	0.802281	106.358	84.516
O14818	Proteasome subunit alpha type-7	PSMA7	27.8868	7.07872e-05	0.95868	461.299	450.242	421.091	474.714	483.055	482.098	460.204	514.349	434.894	530.036	707.879	445.965
O14827	Ras-specific guanine nucleotide-releasing factor 2	RASGRF2	140.764	0.0031235	0.801032	15.9523	10.4477	9.56509		18.9545			11.1483	13.6619	14.473	19.4213	9.74338
O14828	Secretory carrier-associated membrane protein 3	SCAMP3	38.287	8.01609e-05	0.942397	243.429	209.071	241.339	275.039	216.757	212.609	285.102	235.615	251.25	319.398	177.837	199.141
O14841	5-oxoprolinase	OPLAH	137.457	0.00132745	0.845753	62.2464	82.5401	50.0913	67.3341	82.9196	76.3782	61.9414	59.9595	62.8142	73.5649	103.01	90.5322
O14867	Transcription regulator protein BACH1	BACH1	81.9577	0.00016546	0.91283	32.5568	16.589		23.7541		33.1444		50.506	41.5691	42.8504	47.5849	43.9478
O14874	[3-methyl-2-oxobutanoate dehydrogenase [lipoamide]] kinase, mitochondrial	BCKDK	46.3605	0.000184942	0.905725	80.7899	88.6294	106.36	84.5606	104.353	79.2998	96.9343	80.6069	75.818	73.214	45.6488	63.3937
O14879	Interferon-induced protein with tetratricopeptide repeats 3	IFIT3	55.9848	9.7113e-05	0.934936	56.4036	61.0971	99.3936	73.2797	77.317	59.7622	96.9441	62.291	62.3459	52.6522	78.5049	108.122
O14880	Microsomal glutathione S-transferase 3	MGST3	16.5163	0.000111662	0.931618	502.886	505.776	498.956	276.825	307.672	252.492	332.284	307.891	242.262	326.654	323.521	288.925
O14896	Interferon regulatory factor 6	IRF6	53.1298	0.00113037	0.861018		151.991	16.8656	3544.89			59.9456		150.795	85.8885		139.953
O14907	Tax1-binding protein 3	TAX1BP3	13.7347	7.07872e-05	0.959376	368.09	327.327	325.806	360.002	284.885	395.185	385.895	347.473	505.766	377.547	236.469	358.251
O14908	PDZ domain-containing protein GIPC1	GIPC1	36.0492	0.000155839	0.91887	111.91	115.14	107.983	117.886	91.9333	86.1906	94.9771	106.665	133.028	155.229	87.9355	115.9
O14910	Protein lin-7 homolog A	LIN7A	25.9967	0.000145038	0.923758	109.263	216.475	225.311	133.915	137.416	127.211	205.997	139.326	155.21	184.524	77.1219	126.766
O14920	Inhibitor of nuclear factor kappa-B kinase subunit beta	IKBKB	86.5639	0.00122936	0.856778	80.984	101.018	50.2339	71.6159	72.9556	75.8974		84.4634	90.2187	99.1066	80.7253	75.8083
O14925	Mitochondrial import inner membrane translocase subunit Tim23	TIMM23	21.9431	8.5514e-05	0.939095	70.6696	72.1998	80.1986	85.9825	75.0555	61.161	82.2231	59.0967	58.3558	95.1276	40.4453	41.8798
O14929	Histone acetyltransferase type B catalytic subunit	HAT1	49.5126	0.000158671	0.9165	113.94	112.389	141.939	151.59	122.951	147.237	129.921	126.948	153.252	118.34	145.156	174.949
O14933	Ubiquitin/ISG15-conjugating enzyme E2 L6	UBE2L6	17.7687	0.000418696	0.885006		60.5935	197.904	148.801	113.869	102.583	157.588	82.2811		75.9707	95.6423	214
O14936	Peripheral plasma membrane protein CASK	CASK	105.123	7.07872e-05	0.958144	119.622	141.05	82.7845	122.249	111.853	156.146	111.763	99.1333	97.8582	107.295	128.566	114.285
O14939	Phospholipase D2	PLD2	105.987	0.000109465	0.932086	75.4677	88.4451	58.3463	116.196	83.4847	74.4682	83.1796	96.1264	77.6505	104.446	80.5572	68.5628
O14949	Cytochrome b-c1 complex subunit 8	UQCRQ	9.90637	0.000171221	0.910373	234.139	323.068	313.832	243.326	233.977	245.725	270.583	243.587	235.097	289.72	158.704	227.599
O14950	Myosin regulatory light chain 12B	MYL12B	19.7792	6.72261e-05	0.962123	1618.89	1613.42	1420.63	1375.46	1658.18	1500.73	1368.14	1499.56	1491.89	1445.43	1269.95	1103.07
O14957	Cytochrome b-c1 complex subunit 10	UQCR11	6.56968	0.00121154	0.857617	205.564	252.59	285.342	291.276	291.177	257.403	284.752	241.841		312.385	176.96	211.415
O14964	Hepatocyte growth factor-regulated tyrosine kinase substrate	HGS	86.192	0.000131591	0.927389	98.9025	117.245	86.4495	97.64	66.5918	94.0088	109.345	82.3877	101.252	77.368	101.225	92.8008
O14972	Vacuolar protein sorting-associated protein 26C	VPS26C	33.0104	5.66371e-05	0.964782	153.398	174.42	185.312	123.258	155.473	203.342	94.2699	175.512	161.336	119.655	201.317	198.216
O14974	Protein phosphatase 1 regulatory subunit 12A	PPP1R12A	115.281	2.67411e-05	0.969419	168.838	177.195	127.946	169.24	137.45	168.465	155.827	152.917	145.246	139.731	159.62	158.079
O14975	Very long-chain acyl-CoA synthetase	SLC27A2	70.3123	0.0001492	0.92209	168.139	181.947	113.042	172.827	173.857	181.058	123.93	235.365	237.335	192.001	128.681	184.563
O14976	Cyclin-G-associated kinase	GAK	143.191	0.000111954	0.931557	73.1329	68.0845	77.8944	72.9876	59.3782	67.2775	69.7324	65.1523	77.2529	70.5458	81.8348	66.8596
O14979	Heterogeneous nuclear ribonucleoprotein D-like	HNRNPDL	46.4375	5.29389e-05	0.965425	161.999	114.424	101.966	184.283	171.118	166.407	124.743	144.972	221.905	197.403	142.342	178.648
O14980	Exportin-1	XPO1	123.386	6.72261e-05	0.962162	167.437	150.479	205.62	188.732	184.337	186.068	167.936	177.691	197.81	181.2	179.558	182.5
O14981	TATA-binding protein-associated factor 172	BTAF1	206.887	0.000476851	0.882771	57.0284	52.303	43.0072	64.3762	45.7152	52.2297	49.1366	50.9682	67.0113	69.8809	56.0529	64.2951
O15013	Rho guanine nucleotide exchange factor 10	ARHGEF10	151.612	0.000130768	0.927574	73.1678	118.388	78.0781	93.3011	94.1777	99.2501	75.8545	77.6543	66.324	75.8277	89.4468	62.6941
O15018	PDZ domain-containing protein 2	PDZD2	301.641	0.000119715	0.929763	48.2771	30.9172	59.2355	42.6452	23.2816	33.3499	44.6851	46.9521	53.8861	49.1245	37.6509	42.7414
O15020	Spectrin beta chain, non-erythrocytic 2	SPTBN2	271.325	0.000158715	0.91638	91.2647	82.715	74.7883	47.1678	38.9483	50.803	103.555	58.9635	69.5555	102.054	83.2243	60.8865
O15021	Microtubule-associated serine/threonine-protein kinase 4	MAST4	284.097	0.00133486	0.840102			21.4248					16.9358	9.12643			27.3303
O15027	Protein transport protein Sec16A	SEC16A	251.894	0.0001436	0.924189	147.202	95.3621	87.709	114.281	68.766	87.121	123.69	80.7155	122.905	98.8572	97.2341	128.035
O15031	Plexin-B2	PLXNB2	205.127	6.19841e-05	0.963564	105.428	105.134	110.033	96.3011	88.9724	110.139	108.448	131.564	152.745	122.303	131.245	108.793
O15037	Protein KHNYN	KHNYN	74.534	0.000234711	0.896743	42.6845	44.0495	49.2968	40.8181	27.9794	44.8677	34.5527	54.2247	36.1426	36.1086	24.1778	44.974
O15040	Tectonin beta-propeller repeat-containing protein 2	TECPR2	153.848	0.00828344	0.77828		55.7921	40.7037			24.2938			83.5025			47.3362
O15042	U2 snRNP-associated SURP motif-containing protein	U2SURP	118.292	0.000101798	0.933765	127.684	91.3622	61.3547	113.832	71.2413	70.6711	86.923	63.8715	72.6788	93.5535	90.9806	90.535
O15047	Histone-lysine N-methyltransferase SETD1A	SETD1A	186.034	0.00132127	0.848143	33.18	26.5771	31.7251	3.28915		35.3966	36.7761		27.6944	39.7412		38.9117
O15049	NEDD4-binding protein 3	N4BP3	60.4698	0.00144191	0.828315	71.8339	165.629	58.5579	70.4236	45.5213	48.1043	65.2281	63.2573	65.6716	73.268	84.5558	53.5089
O15056	Synaptojanin-2	SYNJ2	165.538	0.00167766	0.820923	51.7566	24.2292	24.1895		30.159	43.4537	39.2908	65.5306	42.7753			44.1083
O15061	Synemin	SYNM	172.768	0.000215488	0.899184	148.11	174.722	125.064	170.597	140.253	197.936	99.5281	93.2006	107.355	91.1801	96.8901	93.6996
O15063	Granule associated Rac and RHOG effector protein 1	GARRE1	116.02	0.000177106	0.908347	65.272	66.7025	78.3685	65.4453	52.471	45.6199	60.725	50.185	47.5094	56.6441	47.2559	53.4628
O15066	Kinesin-like protein KIF3B	KIF3B	85.1252	0.00133803	0.837403	19.9366	12.151	21.8792	27.3111	24.4886	9.31385	13.922	22.0541	16.224	19.822	18.4442	13.6282
O15067	Phosphoribosylformylglycinamidine synthase	PFAS	144.734	7.07872e-05	0.954154	141.635	122.191	168.789	162.25	215.596	170.795	143.033	152.494	143.712	121.681	174.326	188.543
O15068	Guanine nucleotide exchange factor DBS	MCF2L	128.109	0.00147427	0.827009	32.8355	24.0057	38.6001	44.8903	39.6924	28.1168	28.7214	43.6295	39.2321	43.061	33.1674	27.8909
O15084	Serine/threonine-protein phosphatase 6 regulatory ankyrin repeat subunit A	ANKRD28	112.966	0.000533317	0.880832	43.6161	39.1099	22.7425	27.6333	42.1531	36.1898	31.8876	33.3925	36.044	28.0352	32.1255	34.6
O15085	Rho guanine nucleotide exchange factor 11	ARHGEF11	167.704	0.0012916	0.852408	61.9783	66.8278	48.8921	64.7927	56.246	55.718	42.8815	47.3421	54.3389	64.7531	66.7874	64.4248
O15091	Mitochondrial ribonuclease P catalytic subunit	PRORP	67.3153	0.000461076	0.883356	22.7679	18.3369	14.4243	24.1496	16.8482	20.1216	18.2997	17.7132	24.9956	12.9491	16.5624	15.0137
O15111	Inhibitor of nuclear factor kappa-B kinase subunit alpha	CHUK	84.6396	0.0012651	0.854513	47.0068	50.0576	44.2064	44.9497	43.6297	37.0828	56.7129	40.0066	56.7426	52.1091	22.8996	43.7898
O15116	U6 snRNA-associated Sm-like protein LSm1	LSM1	15.1794	0.000597684	0.878692	105.52	106.074	118.629	95.2175	93.3104	103.558	109.91	92.1243	82.3538	92.1154	94.3815	116.809
O15117	FYN-binding protein 1	FYB1	85.3871	0.000292881	0.891634	39.0018	39.1248	47.8002	61.0422	50.432	28.9011	61.3017	26.789	46.0506	29.2199	71.0428	83.8395
O15118	NPC intracellular cholesterol transporter 1	NPC1	142.167	0.000126137	0.92856	154.493	172.345	111.962	137.71	176.219	211.785	116.603	148.61	157.3	142.408	64.3593	152.129
O15119	T-box transcription factor TBX3	TBX3	79.3888	7.1388e-05	0.951034	148.843	40.6264	81.7832	139.363	50.4556	80.6386	112.737	113.404	106.827	122.891	88.6068	123.292
O15121	Sphingolipid delta(4)-desaturase DES1	DEGS1	37.866	7.88382e-05	0.944032	65.4356	80.2991	90.8866	85.3467	80.8248	78.1259	95.63	87.5129	101.606	90.6855	73.2231	69.9532
O15123	Angiopoietin-2	ANGPT2	56.9192	0.000137234	0.925981	37.8792	51.3852	44.7736	28.3025	73.607	105.311			83.3649	19.56	25.0232	162.928
O15126	Secretory carrier-associated membrane protein 1	SCAMP1	37.9204	0.000132107	0.927223	115.067	98.8434	86.7902	105.197	102.865	86.5594	106.962	101.711	105.827	102.151	77.022	94.4566
O15127	Secretory carrier-associated membrane protein 2	SCAMP2	36.6489	8.17454e-05	0.9414	1147.24	1260.51	1137.53	1040.58	1018.87	1092.27	1298.93	1139.53	1293.27	1493.37	868.431	1030.53
O15143	Actin-related protein 2/3 complex subunit 1B	ARPC1B	40.9498	8.30542e-05	0.940301	190.169	239.136	205.037	191.954	225.24	220.992	197.153	218.537	170.814	154.032	261.266	309.065
O15144	Actin-related protein 2/3 complex subunit 2	ARPC2	34.333	7.07872e-05	0.954537	597.359	634.017	676.694	675.848	799.183	708.566	711.028	669.629	627.141	597.226	770.822	762.305
O15145	Actin-related protein 2/3 complex subunit 3	ARPC3	20.5467	6.6047e-05	0.962672	435.8	404.458	507.209	427.069	481.61	445.518	523.907	421.491	409.811	409.191	544.438	467.763
O15155	BET1 homolog	BET1	13.2894	0.000138585	0.92567	315.217	322.51	326.542	259.173	203.797	257.924	249.344	269.741	283.32	263.191	213.652	292.334
O15156	Zinc finger and BTB domain-containing protein 7B	ZBTB7B	58.0269	0.00211354	0.810426	23.8146	37.6895				6.78173	14.8727					21.0719
O15160	DNA-directed RNA polymerases I and III subunit RPAC1	POLR1C	39.2497	0.000385812	0.886428	95.1043	65.2945	99.1187	83.4031	95.4676	49.6763	72.1449	70.5708	56.2426	69.9448	79.6027	74.1522
O15162	Phospholipid scramblase 1	PLSCR1	35.0491	0.000197444	0.90237	180.464	24.6325		155.059	179.521	197.371	154.028		115.992	100.625	155.632	130.193
O15164	Transcription intermediary factor 1-alpha	TRIM24	116.831	0.00160229	0.823025	49.3294	30.8708		56.1647	49.2352	37.8337	19.2305	37.8783	41.4398	53.5081	39.4	47.2114
O15173	Membrane-associated progesterone receptor component 2	PGRMC2	23.8184	6.75753e-05	0.962038	505.731	519.744	639.308	515.032	483.252	482.161	512.926	490.68	544.879	511.032	358.718	417.021
O15182	Centrin-3	CETN3	19.55	0.00395335	0.796642	86.949
O15211	Ral guanine nucleotide dissociation stimulator-like 2	RGL2	83.549	8.4697e-05	0.939568	66.967	69.0658	67.9594	79.388	70.3609	78.0916	62.6956	67.0804	72.6576	62.514	54.9395	76.7338
O15212	Prefoldin subunit 6	PFDN6	14.5827	6.69524e-05	0.962435	81.5456	91.6626	114.783	98.7448	110.24	107.164	107.932	132.957	109.84	115.71	106.566	100.14
O15213	WD repeat-containing protein 46	WDR46	68.0711	0.0013842	0.831116	129.613	101.598		155.489	123.109	174.904	113.607	190.999	164.909	204.241	192.332	127.164
O15226	NF-kappa-B-repressing factor	NKRF	77.6729	0.000972785	0.866555	66.871	59.4304	31.5132	52.1357	50.2895	49.0017	31.4723	43.1371	59.0661	41.9022	46.3968	54.2736
O15228	Dihydroxyacetone phosphate acyltransferase	GNPAT	77.1879	0.00021385	0.899444	75.9127	114.253	104.437	75.5363	76.5173	77.7672	72.6876	80.5018	69.416	107.231	71.302	65.2195
O15229	Kynurenine 3-monooxygenase	KMO	55.81	0.000152442	0.920816	149.813	250.584	138.03	162.916	244.519	296.518	113.522	156.798	152.695	192.02	148.756	353.612
O15230	Laminin subunit alpha-5	LAMA5	399.737	3.56655e-05	0.968039	263.88	254.136	346.7	250.206	216.847	224.66	186.935	260.732	198.769	294.404	224.063	191.254
O15231	Zinc finger protein 185	ZNF185	73.5255	5.87937e-05	0.964318	103.927	140.54	31.6501	157.788	105.323	79.3455	85.3093	94.2055	62.4303	63.8808	93.9864	124.46
O15234	Protein CASC3	CASC3	76.278	0.00149074	0.826433	42.5739	17.8914	47.8137	46.3757	45.7897	39.4655	47.7725	42.5185	48.1423	47.8142	32.7682	40.3864
O15235	28S ribosomal protein S12, mitochondrial	MRPS12	15.1729	0.00113404	0.860885	109.913	141.316	79.2876	123.504	170.056	123.178	94.2837	103.868	183.37	176.243	100.431	172.352
O15239	NADH dehydrogenase [ubiquinone] 1 alpha subcomplex subunit 1	NDUFA1	8.07238	0.0048747	0.792157		193.474	174.175	2375.6		2282.95	1978.55	1093.33	90.1263	113.827
O15243	Leptin receptor gene-related protein	LEPROT	14.2538	0.000996807	0.865729	101.363	111.568	102.851	52.0146	75.5004	65.8604	55.3408	75.7962	56.5986	47.1093	58.543	57.8195
O15247	Chloride intracellular channel protein 2	CLIC2	28.3564	8.30349e-05	0.94046	107.153	80.7815	126.858	149.669	115.1	64.6985	141.015	106.973	64.6069	64.4021	134.112	77.4898
O15254	Peroxisomal acyl-coenzyme A oxidase 3	ACOX3	77.6291	7.98208e-05	0.942756	120.896	169.783	211.438	134.539	141.532	140.159	145.329	170.58	124.74	169.448	127.095	146.822
O15258	Protein RER1	RER1	22.958	1.73858e-05	0.971241	413.49	358.701	563.3	386.416	445.794	410.504	431.615	452.25	453.049	358.659	276.045	336.536
O15260	Surfeit locus protein 4	SURF4	30.394	7.17034e-05	0.950534	2470.08	2340.52	2642.98	1955.73	2212.9	1638.35	1949.89	2172.27	1802.4	1894.51	1688.26	1758.17
O15264	Mitogen-activated protein kinase 13	MAPK13	42.0896	0.000315402	0.890111	106.363	49.6088	93.0843	91.0115	63.9464	89.9665	117.85	108.973	94.6384	94.4375	69.2958	84.3064
O15265	Ataxin-7	ATXN7	95.4515	0.000145467	0.923611	71.4624	58.8496	52.0285	78.0157	13.484	39.7274	63.5196	33.0782	58.3608	60.3608	42.6488	71.3348
O15269	Serine palmitoyltransferase 1	SPTLC1	52.7439	0.000145467	0.923628	190.493	239.58	249.28	215.036	257.711	188.057	195.143	190.368	307.072	282.852	135.889	181.415
O15270	Serine palmitoyltransferase 2	SPTLC2	62.9243	8.1035e-05	0.941889	73.6006	70.918	66.6987	57.3299	62.7935	77.7454	66.0878	53.9884	62.3954	58.7485	40.7651	55.7112
O15294	UDP-N-acetylglucosamine--peptide N-acetylglucosaminyltransferase 110 kDa subunit	OGT	116.925	7.5896e-05	0.946235	141.628	135.038	114.791	146.318	82.1755	117.756	149.604	148.106	154.595	166.466	142.025	126.473
O15305	Phosphomannomutase 2	PMM2	28.0821	5.54456e-05	0.964937	223.693	202.392	252.064	223.006	245.714	235.682	265.909	189.248	197.045	154.313	312.064	342.337
O15321	Transmembrane 9 superfamily member 1	TM9SF1	68.8606	8.4697e-05	0.939581	139.533	152.357	135.699	125.332	133.888	122.83	116.766	124.171	125.036	119.946	109.679	127.974
O15327	Inositol polyphosphate 4-phosphatase type II	INPP4B	104.738	0.000857976	0.870355	39.5363	51.8079	25.269	27.5411	32.6099	50.1224	59.6474	25.4488	24.3708	19.8457	50.7094	48.4672
O15344	E3 ubiquitin-protein ligase Midline-1	MID1	75.2507	0.000279507	0.892563	41.8908	54.8828	45.5106	47.1319	54.9736	64.0395	37.2643	61.2964	55.323	47.5382	33.6828	47.0853
O15347	High mobility group protein B3	HMGB3	22.98	7.07872e-05	0.960229	565.137	409.074	768.423	571.555	510.167	420.699	843.596	597.533	467.281	529.177	561.782	543.003
O15355	Protein phosphatase 1G	PPM1G	59.2716	7.07872e-05	0.956375	117.023	121.057	124.822	143.004	131.066	138.662	135.216	132.861	142.871	125.658	187.675	164.658
O15357	Phosphatidylinositol 3,4,5-trisphosphate 5-phosphatase 2	INPPL1	138.599	7.07872e-05	0.953611	121.739	127.752	95.9154	130.905	89.8669	136.421	119.023	129.724	160.688	159.269	132.203	129.646
O15371	Eukaryotic translation initiation factor 3 subunit D	EIF3D	63.9728	2.03103e-07	0.981433	94.4763	114.26	121.001	105.4	90.3619	92.6443	97.973	115.999	108.278	102.328	102.651	103.098
O15372	Eukaryotic translation initiation factor 3 subunit H	EIF3H	39.9303	7.23262e-05	0.949196	206.842	229.153	251.66	217.668	204.94	209.726	235.024	248.178	276.506	282.9	220.098	194.371
O15374	Monocarboxylate transporter 5	SLC16A4	54.022	0.00099686	0.865723	25.0407	38.7996	12.4499	36.7864	5.59166	25.8044	50.9455	13.0903	40.3203	20.0872	27.9285	27.5343
O15379	Histone deacetylase 3	HDAC3	48.8477	0.000359176	0.887709	91.1575	90.8235	100.149	70.6933	51.2079	84.765	106.578	89.9621	45.2958	60.9896	83.6842	80.118
O15381	Nuclear valosin-containing protein-like	NVL	95.0508	0.000162838	0.913954	63.4046	65.266	29.0442	49.127	33.327	53.7217	58.2964	67.4669	54.3895	52.8865	52.3857	65.1684
O15382	Branched-chain-amino-acid aminotransferase, mitochondrial	BCAT2	44.2877	7.35348e-05	0.947975	155.205	196.14	265.497	214.644	243.605	246.504	268.688	208.774	269.794	241.798	130.267	219.911
O15397	Importin-8	IPO8	119.938	0.000615252	0.878123	46.7746	43.1786	57.7436	52.5204	64.0061	55.7557	54.4183	56.514	58.9	56.9913	45.6723	54.6281
O15400	Syntaxin-7	STX7	29.8155	1.9593e-05	0.970723	1122.74	1206.44	928.502	1191.34	1121.07	1124.1	1221.07	1225.36	1092.85	1093.69	1175.23	1106.07
O15417	Trinucleotide repeat-containing gene 18 protein	TNRC18	314.519	0.00740524	0.781609	8.89204
O15427	Monocarboxylate transporter 4	SLC16A3	49.4694	7.07872e-05	0.95346	368.511	253.624	477.829	308.829	265.406	302.121	314.332	440.53	490.43	503.992	309.784	288.574
O15431	High affinity copper uptake protein 1	SLC31A1	21.0906	0.00131251	0.850054	109.114	118.906	145.337	103.067	104.082	103.024	61.8837	95.7196	108.047	87.8719	83.236	110.973
O15439	ATP-binding cassette sub-family C member 4	ABCC4	149.527	0.00134553	0.8353	161.766	145.419	1819.83	14.7033	117.699	104.77	117.037	143.144	71.9869	118.422
O15455	Toll-like receptor 3	TLR3	103.829	0.000930705	0.86798	54.9581	79.0696	83.0872	67.4564	90.5682	78.6201	82.4983	66.0163	87.3811	92.108	75.2585	75.9109
O15460	Prolyl 4-hydroxylase subunit alpha-2	P4HA2	60.9019	0.000130092	0.927711	138.281	106.065	108.395	102.334	105.362	115.253	141.581	69.1855	82.3732	133.49	110.131	119.325
O15484	Calpain-5	CAPN5	73.1689	0.000128758	0.928005	68.9935	84.9623	56.2553	70.6705	71.6885	98.3569	112.64	80.0334	57.5462	88.0799	68.7506	37.9826
O15498	Synaptobrevin homolog YKT6	YKT6	22.4176	0.000157841	0.917342	88.1969	86.663	98.9284	109.466	133.172	90.9268	123.194	84.1901	78.7497	92.9513	121.027	112.772
O15504	Nucleoporin NUP42	NUP42	44.8716	0.000217142	0.898914	88.3598	75.3691	76.469	79.8805	41.688	61.6672	95.1372	79.0753	82.598	92.2392	56.8516	85.8015
O15511	Actin-related protein 2/3 complex subunit 5	ARPC5	16.3204	7.07872e-05	0.959811	1174.8	1165.72	1113.44	1292	1446.06	1199.34	1213.19	1171.68	1026.28	954.354	1650.93	1242.46
O15514	DNA-directed RNA polymerase II subunit RPB4	POLR2D	16.3113	0.000170966	0.910517	123.524	108.953	141.578	129.004	108.202	116.585	127.848	135.256	112.351	114.406	79.7247	94.4536
O15523	ATP-dependent RNA helicase DDX3Y	DDX3Y	73.1536	0.00128258	0.853162	185.055	424.844	131.012	112.057	89.9038		151.616	177.23	191.749	241.851	123.861
O15525	Transcription factor MafG	MAFG	17.8496	0.00232501	0.807211		9.06922		15.2259				9.32198				9.08761
O15530	3-phosphoinositide-dependent protein kinase 1	PDPK1	63.1519	7.66996e-05	0.945611	79.6925	84.9338	104.051	86.6142	83.3337	73.5458	90.6448	76.7165	85.8645	100.052	83.4094	73.8744
O15533	Tapasin	TAPBP	47.6258	7.35348e-05	0.947895	345.854	351.114	794.39	252.631	311.287	261.164	450.295	339.48	283.019	243.542	411.642	346.666
O15541	E3 ubiquitin-protein ligase RNF113A	RNF113A	38.7871	0.00162533	0.822411	37.899	26.6436			23.6963			34.4323	71.2558		61.5632	68.3774
O15550	Lysine-specific demethylase 6A	KDM6A	154.177	0.00130702	0.850814	43.8859	30.0176	2.58808	46.4861	22.9102	40.1652	34.1733	31.0348	47.6332	36.9094		45.4756
O15554	Intermediate conductance calcium-activated potassium channel protein 4	KCNN4	47.6955	0.000162585	0.914068	94.9424	77.1613	116.734	139.31	87.9898	78.8788	110.857	105.044	144.397	162.335	88.9368	105.095
O43143	Pre-mRNA-splicing factor ATP-dependent RNA helicase DHX15	DHX15	90.9328	7.14886e-05	0.950777	320.949	253.864	210.064	304.501	218.851	242.048	248.454	249.887	286.086	304.697	256.13	293.051
O43148	mRNA cap guanine-N7 methyltransferase	RNMT	54.8441	0.000348506	0.888245	127.506	92.4921	69.8792	109.921	100.005	100.596	100.229	99.168	130.222	121.211	88.6517	125.928
O43149	Zinc finger ZZ-type and EF-hand domain-containing protein 1	ZZEF1	331.075	0.000186511	0.905087	49.3448	57.8073	42.238	45.7466	49.5287	43.9191	40.7634	47.7526	49.1821	54.9144	44.1208	44.8025
O43150	Arf-GAP with SH3 domain, ANK repeat and PH domain-containing protein 2	ASAP2	111.651	0.0011552	0.859973	39.8301	30.7618	28.8123	31.7859	41.6273	36.6437	17.0442	27.1074	35.0311	51.3042	53.8351	36.6694
O43156	TELO2-interacting protein 1 homolog	TTI1	122.069	0.00176464	0.818679	29.5084	22.0056	30.6968	16.9993	28.4756	29.5235		8.35078	22.1128	27.4429	18.6226	14.6208
O43157	Plexin-B1	PLXNB1	232.298	0.00015133	0.921237	48.6031	68.1465	41.8492	60.268	61.7802	61.5275	54.2598	65.7148	60.46	66.831	65.183	54.1564
O43159	Ribosomal RNA-processing protein 8	RRP8	50.7148	0.000237342	0.896426	76.8521	107.355	32.7321	60.4139	87.4508	89.8899	79.9128	67.3588	76.0588	110.033	39.3432	63.1451
O43166	Signal-induced proliferation-associated 1-like protein 1	SIPA1L1	200.029	0.000157841	0.917212	55.9119	52.5171	88.2348	62.442	31.1433	54.9706	71.6764	64.4005	74.3777	74.2945	49.2557	59.9952
O43169	Cytochrome b5 type B	CYB5B	16.6945	4.03398e-05	0.967321	539.916	496.867	368.358	413.582	426.928	398.589	457.175	450.467	472.125	495.421	357.319	368.55
O43172	U4/U6 small nuclear ribonucleoprotein Prp4	PRPF4	58.4492	0.000185699	0.905378	111.913	103.787	93.3653	86.1178	61.3411	79.3055	79.4565	85.9969	75.995	95.9225	80.4756	96.0359
O43175	D-3-phosphoglycerate dehydrogenase	PHGDH	56.6505	7.07872e-05	0.95583	165.243	187.43	143.061	132.323	152.656	291.902	184.822	135.656	114.305	117.105	386.899	201.144
O43181	NADH dehydrogenase [ubiquinone] iron-sulfur protein 4, mitochondrial	NDUFS4	20.108	7.34347e-05	0.948161	283.75	266.021	269.894	267.278	324.733	272.783	240.241	269.084	259.722	312.051	190.86	232.581
O43182	Rho GTPase-activating protein 6	ARHGAP6	105.947	0.00133486	0.840045	13.6426	24.9171	6.54686	13.3983		33.5876	24.4206	12.6284		8.35884	8.66081	19.4135
O43184	Disintegrin and metalloproteinase domain-containing protein 12	ADAM12	99.5422	7.9658e-05	0.942934	218.032	240.492	461.943	155.979	201.771	158.732	186.197	256.93	303.903	299.392	214.015	103.195
O43189	PHD finger protein 1	PHF1	62.1058	0.00111931	0.861477	115.012	81.9368	89.6062	107.833	15.0412	78.925	84.3979	72.548	63.9885	81.1883	57.7757	81.6274
O43236	Septin-4	SEPTIN4	55.0982	7.07872e-05	0.956395	145.942	159.439	125.746	152.773	165.653	138.673	145.892	123.309	101.201	62.0163	142.477	101.995
O43237	Cytoplasmic dynein 1 light intermediate chain 2	DYNC1LI2	54.0993	1.99878e-14	0.998404	123.944	149.243	104.21	126.93	124.569	137.905	141.118	147.225	151.032	156.537	144.609	133.405
O43242	26S proteasome non-ATPase regulatory subunit 3	PSMD3	60.9776	7.07872e-05	0.953123	295.002	324.891	293.858	320.779	344.239	324.578	300.427	366.685	336.869	409.276	386.076	297.007
O43246	Cationic amino acid transporter 4	SLC7A4	68.268	0.000391856	0.886153	119.465	29.0851	135.463	61.0211	70.4397	58.0436	121.035	170.423	109.061	117.504	100.306	58.392
O43251	RNA binding protein fox-1 homolog 2	RBFOX2	41.3738	0.00133486	0.839898	46.9772	33.3245		51.348	68.5566	42.103	37.8309	32.5747	58.5978	40.8451	45.8288	57.2009
O43252	Bifunctional 3'-phosphoadenosine 5'-phosphosulfate synthase 1	PAPSS1	70.8331	0.000455068	0.883585	86.5342	77.1093	67.0754	108.252	91.1626	86.2324	97.6809	74.0415	67.4388	61.4249	116.769	104.718
O43264	Centromere/kinetochore protein zw10 homolog	ZW10	88.8295	0.000131831	0.927287	94.0832	101.913	93.3265	102.575	104.729	103.763	104.4	95.5693	110.654	106.169	82.6358	93.0569
O43278	Kunitz-type protease inhibitor 1	SPINT1	58.398	7.07872e-05	0.955731	440.925	519.816	458.749	266.142	436.125	424.609	225.578	542.326	381.323	384.033	480.378	425.559
O43281	Embryonal Fyn-associated substrate	EFS	58.8154	0.000162224	0.914354	160.734	137.441	213.733	152.695	86.5997	142.224	181.153	156.607	189.082	124.353	158.614	134.497
O43290	U4/U6.U5 tri-snRNP-associated protein 1	SART1	90.2548	0.000114449	0.931001	121.528	99.601	76.4971	88.1304	65.9096	69.6765	78.1097	73.3771	83.4245	88.7127	101.926	96.601
O43291	Kunitz-type protease inhibitor 2	SPINT2	28.2281	7.07872e-05	0.955909	111.192	152.323	110.135	97.0343	88.4497	71.9851	103.754	116.87	120.437	101.037	108.471	101.067
O43292	Glycosylphosphatidylinositol anchor attachment 1 protein	GPAA1	67.6232	0.000224641	0.897953	107.732	132.758	158.653	141.923	149.58	111.783	132.222	160.106	142.418	156.825	109.168	110.826
O43293	Death-associated protein kinase 3	DAPK3	52.5357	0.00133476	0.842	42.3115	45.5552	41.9019	54.4383	42.825	66.1406	54.5147	37.1346	41.9465	48.8755	26.0742	35.2604
O43294	Transforming growth factor beta-1-induced transcript 1 protein	TGFB1I1	49.8142	0.000114852	0.930926	194.858	256.112	92.5024	189.57	160.425	225.778	142.283	123.325	115.299	59.8979	134.251	190.1
O43299	AP-5 complex subunit zeta-1	AP5Z1	88.6052	0.00649338	0.785161	88.6066	64.2232	80.0631			91.5774		68.6116	68.2147	52.6669		93.2941
O43301	Heat shock 70 kDa protein 12A	HSPA12A	74.9784	9.63898e-05	0.935125	98.2803	92.2469	81.0751	96.8288	91.7608	83.3023	134.632	75.9363	55.764	75.8103	89.218	68.4938
O43306	Adenylate cyclase type 6	ADCY6	130.615	0.00134443	0.835694	8.79903	8.69508		46.555	10.8569	17.5858		16.4779	23.416	16.2874		17.9506
O43312	Protein MTSS 1	MTSS1	82.2511	0.0013305	0.844045	104.215	169.213		116.547	119.803	109.034		101.896	105.283	110.736	91.8029	125.41
O43314	Inositol hexakisphosphate and diphosphoinositol-pentakisphosphate kinase 2	PPIP5K2	140.407	0.00142985	0.828762	80.1451	68.5526	74.9405	83.1267	131.031	108.514	94.2415	67.307	105.051	83.9129	91.1333	63.4106
O43318	Mitogen-activated protein kinase kinase kinase 7	MAP3K7	67.196	0.000154709	0.919631	51.129	42.382	34.8086	38.2992	24.6576	41.1835	21.1261	37.0497	37.7696	38.1234	33.7762	44.0131
O43324	Eukaryotic translation elongation factor 1 epsilon-1	EEF1E1	19.8106	7.39117e-05	0.947657	169.34	195.636	197.457	186.467	180.661	201.924	167.835	210.402	165.332	183.173	201.324	190.242
O43353	Receptor-interacting serine/threonine-protein kinase 2	RIPK2	61.1949	0.000202553	0.901346	56.5617	56.1488	52.4506	47.7066	37.274	40.0317	42.7076	53.6584	63.0454	55.4166	41.8787	51.4393
O43374	Ras GTPase-activating protein 4	RASA4	90.4576	0.000158715	0.916301	158.582	58.0852	75.9447	164.733	83.2447	92.61	103.623	122.494	67.8186	154.889	72.9923	59.2906
O43390	Heterogeneous nuclear ribonucleoprotein R	HNRNPR	70.9431	7.52784e-05	0.946726	410.021	359.723	303.665	432.24	314.415	338.122	326.071	402.118	445.891	468.48	455.768	420.599
O43395	U4/U6 small nuclear ribonucleoprotein Prp3	PRPF3	77.5289	0.000198305	0.902163	131.522	86.9152	93.0312	121.953	90.4126	99.2989	103.821	98.9705	99.8072	137.095	122.525	119.062
O43396	Thioredoxin-like protein 1	TXNL1	32.2513	0.000113823	0.931146	135.765	123.433	127.709	166.877	179.244	156.983	138.577	128.035	152.066	148.61	175.139	160.146
O43399	Tumor protein D54	TPD52L2	22.2377	9.61276e-10	0.988348	163.555	169.034	157.136	192.886	180.232	177.676	192.667	179.187	181.363	249.878	271.154	261.455
O43402	ER membrane protein complex subunit 8	EMC8	23.773	8.61155e-05	0.938842	81.9305	97.6316	85.9148	77.3027	98.1851	89.608	60.7131	92.3201	93.6141	87.6115	45.6351	84.2725
O43414	ERI1 exoribonuclease 3	ERI3	37.2382	0.0013361	0.838446	48.1476		35.7524	62.2253					23.0674
O43422	52 kDa repressor of the inhibitor of the protein kinase	THAP12	87.704	0.000758791	0.873507	77.1801	46.5181		88.589	78.0264		73.3002	88.1702	80.493	76.5353	68.2073	79.3644
O43426	Synaptojanin-1	SYNJ1	173.103	0.000153826	0.92013	95.4215	95.8522	101.037	83.4578	60.6399	85.3803	84.0309	84.7566	114.241	97.5852	82.3103	93.526
O43427	Acidic fibroblast growth factor intracellular-binding protein	FIBP	41.8781	0.00198597	0.813152	58.4685	31.3098	37.6491			56.3536	56.3532		49.553	32.2526	34.7123	51.0933
O43432	Eukaryotic translation initiation factor 4 gamma 3	EIF4G3	176.652	1.5941e-05	0.971581	87.3566	75.7756	91.4633	82.2435	72.8278	83.1904	64.119	86.2458	94.4522	100.232	91.9024	80.4211
O43447	Peptidyl-prolyl cis-trans isomerase H	PPIH	19.2081	0.000120297	0.929647	162.869	157.269	215.599	179.129	177.781	186.647	206.262	163.143	147.316	169.115	165.805	137.252
O43462	Membrane-bound transcription factor site-2 protease	MBTPS2	57.4436	0.000996807	0.865736	131.486	57.8318	131.554	77.9113	113.605	126.76		96.0343	109.734	94.3339	73.9631	155.875
O43464	Serine protease HTRA2, mitochondrial	HTRA2	48.8409	0.00018662	0.905045	215.881	251.727	277.358	248.814	242.361	200.072	205.491	224.647	264.334	264.118	201.622	177.936
O43474	Krueppel-like factor 4	KLF4	54.6705	0.000767224	0.873226	116.155	54.532	4.31173					44.8713				45.8087
O43488	Aflatoxin B1 aldehyde reductase member 2	AKR7A2	39.589	7.07872e-05	0.958603	239.296	234.302	300.423	313.34	317.391	309.104	324.299	244.234	221.65	193.178	329.757	349.198
O43490	Prominin-1	PROM1	97.202	0.000192481	0.90343	47.6675	70.8689	45.0432	57.3227	43.8319	45.5566	75.9889	59.3359	47.4832	40.2156	57.4395	50.5689
O43491	Band 4.1-like protein 2	EPB41L2	112.588	7.95735e-05	0.943205	237.551	259.091	118.006	261.468	192.544	244.31	214.863	232.879	137.752	166.62	246.642	193.695
O43493	Trans-Golgi network integral membrane protein 2	TGOLN2	45.8796	0.000713553	0.874962	72.391	94.0253	89.0864	80.0239	62.1263	78.6287	111.809	72.3093	81.1666	84.3437	59.0548	61.6029
O43504	Ragulator complex protein LAMTOR5	LAMTOR5	9.61391	0.00015836	0.916772	82.4632	61.5706	87.2876	90.5558	85.3549	86.7322	93.5247	78.9705	110.96	97.9628	64.1712	70.5238
O43505	Beta-1,4-glucuronyltransferase 1	B4GAT1	47.1191	0.000580042	0.879268	62.9577	78.9468	89.5392	84.8132			78.1551	80.7841	74.0838			44.0292
O43508	Tumor necrosis factor ligand superfamily member 12	TNFSF12	27.2162	0.00134651	0.835064	26.7376	9.99142	18.0206	15.1304	16.8141	11.2703	16.9388	12.5834	9.9925			12.5015
O43516	WAS/WASL-interacting protein family member 1	WIPF1	51.2585	0.000923096	0.86824	125.296	144.134	106.006	166.148	209.329	168.25	198.825	114.72	108.33	47.4762	283.684	207.508
O43521	Bcl-2-like protein 11	BCL2L11	22.171	0.00105811	0.863669	78.0951	11.0595	72.758	31.4211	37.4371	45.4263	38.3439	48.0431	34.1002	53.6965	34.7428	26.0056
O43556	Epsilon-sarcoglycan	SGCE	49.851	0.000169532	0.911103	93.1145	78.9461	101.173	71.7906	71.8083	114.116	95.3125	48.7546	44.5277	67.8984	114.178	49.71
O43567	E3 ubiquitin-protein ligase RNF13	RNF13	42.8136	0.000188323	0.904513	67.3175	51.8768	73.9002	58.771	55.829	34.0475	37.9758	53.5263	51.4256		37.8462	58.9542
O43572	A-kinase anchor protein 10, mitochondrial	AKAP10	73.8182	0.00108911	0.862542	72.9882	61.6034	67.8653	62.1451	55.809	65.6896	74.4698	67.1065	89.2233	92.0756	70.0994	58.2977
O43581	Synaptotagmin-7	SYT7	45.5014	0.0001436	0.924222	86.9407	110.035	111.366	95.276	107.149	85.6536	85.22	114.749	107.923	135.416	66.3058	97.8859
O43583	Density-regulated protein	DENR	22.092	0.000148017	0.922723	187.855	159.46	190.789	193.244	211.498	188.772	218.41	200.727	185.754	141.741	156.082	231.582
O43586	Proline-serine-threonine phosphatase-interacting protein 1	PSTPIP1	47.5913	0.00216847	0.809436	86.7417	63.2319		330.6		56.7222	162.726	65.7582			113.883	74.373
O43592	Exportin-T	XPOT	109.964	0.000176138	0.90864	87.0705	78.1221	101.357	98.2885	116.129	102.952	83.4971	87.2015	93.852	80.2763	121.785	118.57
O43598	2'-deoxynucleoside 5'-phosphate N-hydrolase 1	DNPH1	19.1084	0.000107446	0.932598	84.2747	74.3811	63.7798	75.7952	111.775	89.185	86.7972	88.3137	80.4469	84.7343	108.399	95.888
O43615	Mitochondrial import inner membrane translocase subunit TIM44	TIMM44	51.3557	7.07872e-05	0.956596	134.088	124.912	142.797	146.265	137.289	135.552	141.894	132.722	142.375	158.449	105.724	125.571
O43617	Trafficking protein particle complex subunit 3	TRAPPC3	20.2741	0.00125535	0.855226	79.1803	106.746	83.434	93.4016	107.249	102.868	121.607	121.492	101.604	97.9467	103.054	90.9013
O43633	Charged multivesicular body protein 2a	CHMP2A	25.1039	0.000159018	0.916057	221.282	162.29	306.018	213.185	252.767	196.794	276.942	195.52	188.204	202.736	181.226	200.641
O43639	Cytoplasmic protein NCK2	NCK2	42.9151	7.43798e-05	0.947469	87.3354	89.286	45.7057	101.452	80.2405	90.2225	74.4811	83.6021	92.6059	60.9425	74.3395	94.5827
O43657	Tetraspanin-6	TSPAN6	27.5633	0.000663651	0.876582	150.233	103.912	170.617	83.3573		83.9687	98.4702	119.773	76.1811	84.5318	77.1831	63.8095
O43660	Pleiotropic regulator 1	PLRG1	57.1938	0.000118846	0.929987	101.345	100.555	81.4796	88.6997	56.8486	88.6062	101.917	93.6315	96.7015	95.7397	102.85	93.8882
O43665	Regulator of G-protein signaling 10	RGS10	21.2099	0.000322313	0.889719	66.6369	52.0999	60.4803	101.309	75.0433	67.4217	55.0268	49.1591	53.9393	42.6062	89.8992	102.293
O43670	BUB3-interacting and GLEBS motif-containing protein ZNF207	ZNF207	50.7505	0.000108027	0.932477	695.509	559.659	290.343	567.142	409.289	321.398	381.176	383.658	439.392	509.161	484.226	609.815
O43674	NADH dehydrogenase [ubiquinone] 1 beta subcomplex subunit 5, mitochondrial	NDUFB5	21.7503	0.000166331	0.912383	230.283	213.767	229.3	185.839	201.715	164.4	167.579	166.498	144.952	163.84	134.957	151.321
O43676	NADH dehydrogenase [ubiquinone] 1 beta subcomplex subunit 3	NDUFB3	11.402	7.99476e-05	0.942655	333.446	391.672	364.979	324.386	418.654	372.486	376.004	302.483	288.806	303.994	197.143	245.475
O43677	NADH dehydrogenase [ubiquinone] 1 subunit C1, mitochondrial	NDUFC1	8.73426	0.000366644	0.887303	267.202	272.189	389.016	310.358	415.05	244.464	223.428	285.901	312.868	271.612	156.419	208.864
O43678	NADH dehydrogenase [ubiquinone] 1 alpha subcomplex subunit 2	NDUFA2	10.9216	0.000182515	0.906545	373.083	352.153	474.324	265.596	435.289	342.607	320.05	376.508	336.901	110.342	190.376	248.716
O43680	Transcription factor 21	TCF21	19.7153	0.000179923	0.907315	72.2975	56.6305		56.2171	59.3251		73.1174	49.8081	41.8299	44.5402	68.8304	36.3782
O43681	ATPase GET3	GET3	38.7928	8.01386e-05	0.942494	295.363	294.109	302.218	292.134	340.41	288.079	297.702	330.419	288.767	249.572	351.035	284.42
O43684	Mitotic checkpoint protein BUB3	BUB3	37.1548	7.07872e-05	0.956646	342.773	373.589	334.855	361.934	336.557	311.711	316.977	344.849	283.36	365.301	258.697	289.032
O43699	Sialic acid-binding Ig-like lectin 6	SIGLEC6	49.9128	7.23262e-05	0.94972	319.133	160.402	1036.39	349.544	170.266	125.143	231.638	298.357	573.607	636.666	298.432	104.351
O43707	Alpha-actinin-4	ACTN4	104.854	6.00598e-08	0.983392	1313.49	1292.99	1478.33	1332	1516.11	1480	1329.35	1321.35	1313.73	1414.75	1433.13	1182.25
O43708	Maleylacetoacetate isomerase	GSTZ1	24.2122	7.62063e-05	0.946096	234.803	170.991	214.332	264.512	173.111	231.398	219.599	286.15	324.707	265.319	220.331	221.063
O43709	Probable 18S rRNA (guanine-N(7))-methyltransferase	BUD23	31.8804	0.00701557	0.783123		15.1327		40.9829				35.9127				31.7068
O43715	TP53-regulated inhibitor of apoptosis 1	TRIAP1	8.7859	0.000152151	0.920969	69.5149	82.0602	77.4974	85.4906	77.5121	75.9209	64.0093	73.8295	71.9843	70.8559	87.2118	82.7932
O43716	Glutamyl-tRNA(Gln) amidotransferase subunit C, mitochondrial	GATC	15.086	0.000186749	0.905006	150.395	138.233	129.807	169.145	180.764	119.813	128.383	140.023	116.343	183.35	109.962	122.818
O43719	HIV Tat-specific factor 1	HTATSF1	85.8528	0.00015029	0.921628	49.6543	42.2858	17.7029	37.7237	26.7344	29.7126	31.3927	31.3249	31.7708	31.8722	46.8216	49.062
O43739	Cytohesin-3	CYTH3	46.3486	0.000168262	0.911543	100.451	98.7428	101.803	106.981	112.749	99.4403	105.628	92.8373	100.516	111.824	84.7512	109.084
O43741	5'-AMP-activated protein kinase subunit beta-2	PRKAB2	30.3022	0.000415521	0.885149	95.8868	94.6822	66.9962	73.4717	68.6524	108.297	100.835	64.2838	63.5637	113.151	134.243	73.9953
O43745	Calcineurin B homologous protein 2	CHP2	22.4524	0.00194822	0.814039		74.5546		96.1612	74.9368	133.427	94.8107		84.9474	66.5929
O43747	AP-1 complex subunit gamma-1	AP1G1	91.3514	7.23262e-05	0.949431	153.447	160.075	157.389	140.217	150.929	135.09	150.829	144.12	159.219	142.861	189.508	162.092
O43752	Syntaxin-6	STX6	29.176	0.000293543	0.891576	88.8545	88.1049	82.6346	67.3843	61.2028	71.55	92.4734	77.9423	72.8309	78.0027	55.6886	80.6496
O43759	Synaptogyrin-1	SYNGR1	25.4556	0.000605878	0.878429		250.952	220.631	198.888	185.103	187.978	239.742	299.69			233.134	182.253
O43760	Synaptogyrin-2	SYNGR2	24.8101	0.000163518	0.913587	79.998	210.104	191.053	86.2723	60.9354	125.49	91.0023	138.49	59.8656	62.5879	188.289	139.149
O43761	Synaptogyrin-3	SYNGR3	24.555	0.000675	0.87621	450.475	47.6227		373.435	193.919	336.267	162.568	433.259	408.775	454.773	316.813	435.15
O43765	Small glutamine-rich tetratricopeptide repeat-containing protein alpha	SGTA	34.0631	0.000145594	0.923562	246.984	301.151	206.094	299.586	300.41	377.515	252.53	324.384	371.004	278.204	325.23	346.193
O43768	Alpha-endosulfine	ENSA	13.389	8.2732e-05	0.940717	190.988	168.097	121.646	241.068	183.229	163.708	144.787	225.19	221.724	195.39	146.425	257.321
O43772	Mitochondrial carnitine/acylcarnitine carrier protein	SLC25A20	32.9437	0.00046381	0.883247	217.3	271.187	265.928	221.641	213.135	201.092	235.771	193.776	188.103	224.857	175.252	186.92
O43776	Asparagine--tRNA ligase, cytoplasmic	NARS1	62.9429	7.17608e-05	0.95027	145.951	122.334	159.633	145.649	150.106	169.723	122.273	124.541	140.063	132.789	181.397	179.88
O43795	Unconventional myosin-Ib	MYO1B	131.985	7.07872e-05	0.953044	277.21	322.228	185.887	265.922	269.746	245.73	181.261	256.029	195.098	195.244	167.572	226.198
O43805	Sjoegren syndrome nuclear autoantigen 1	SSNA1	13.5962	0.0013343	0.843043	79.6551	21.0452										89.8765
O43808	Peroxisomal membrane protein PMP34	SLC25A17	34.5669	0.000836834	0.871032	69.1166	60.1432	100.443	60.8638	50.32	50.7786	53.9342	60.659	62.4027	82.1098	55.3623	58.0713
O43809	Cleavage and polyadenylation specificity factor subunit 5	NUDT21	26.2273	7.07872e-05	0.95671	271.566	260.649	251.839	273.829	190.498	228.945	196.622	244.194	239.992	278.652	235.151	260.363
O43813	Glutathione S-transferase LANCL1	LANCL1	45.2831	8.22277e-05	0.941075	287.412	274.341	336.592	340.486	366.988	379.963	313.822	243.206	244.505	193.597	195.531	331.279
O43815	Striatin	STRN	86.1321	7.07872e-05	0.95525	134.026	146.528	106.508	134.514	123.029	129.15	122.157	130.939	139.901	151.481	133.049	116.797
O43818	U3 small nucleolar RNA-interacting protein 2	RRP9	51.8406	0.000261206	0.894015	147.653	140.886	127.998	143.053	89.522	101.255	145.628	121.599	115.662	99.6728	82.5835	106.636
O43819	Protein SCO2 homolog, mitochondrial	SCO2	29.8099	0.000182537	0.906492	87.9378	113.463	110.55	125.871	95.1781	109.151	104.748	106.724	100.18	129.528	57.4535	87.3084
O43823	A-kinase anchor protein 8	AKAP8	76.1083	0.00117305	0.85925	106.308	72.3695		88.9915	30.3607			64.0997	68.2573	88.7476	60.2336	85.7384
O43824	Putative GTP-binding protein 6	GTPBP6	56.8975	0.000325615	0.889495	85.0574	85.5424	50.4462	89.5528	86.1033	71.1875	53.6428	70.1737	86.1651	92.412	61.6401	61.1169
O43826	Glucose-6-phosphate exchanger SLC37A4	SLC37A4	46.3601	0.000207134	0.900524	159.934	174.165	244.125	154.194	176.737	151.043	140.529	183.592	193.9	197.641	126.2	114.406
O43837	Isocitrate dehydrogenase [NAD] subunit beta, mitochondrial	IDH3B	42.1837	7.88662e-05	0.943944	216.044	213.765	224.72	264.81	189.036	207.396	209.557	211.098	262.002	282.376	172.17	195.477
O43847	Nardilysin	NRDC	131.701	0.000158609	0.916564	81.4276	67.9452	106.928	96.2258	109.453	88.6529	77.2917	82.692	95.1816	89.3505	103.557	123.814
O43852	Calumenin	CALU	37.1068	7.07872e-05	0.952949	334.732	284.915	544.976	279.028	464.739	348.544	320.287	320.077	430.921	359.424	350.79	399.105
O43854	EGF-like repeat and discoidin I-like domain-containing protein 3	EDIL3	53.7649	0.00123814	0.856325		45.6033	39.3109			68.5047					77.1735
O43861	Probable phospholipid-transporting ATPase IIB	ATP9B	129.304	0.000889677	0.869352	55.3064	69.7519	71.6599	63.0666	72.1619	51.3871	77.5479	44.8883	62.9674	63.2039	42.6197	59.4341
O43865	S-adenosylhomocysteine hydrolase-like protein 1	AHCYL1	58.9514	0.000135179	0.926534	196.161	223.19	193.36	194.348	194.655	231.919	162.426	227.583	253.356	179.684	217.662	233.657
O43866	CD5 antigen-like	CD5L	38.0878	0.001326	0.846683	100.855	60.6881	104.022	66.6754	147.502		115.164	117.545	105.222	60.9433		109.644
O43909	Exostosin-like 3	EXTL3	104.749	0.00138268	0.831218		25.1549		11.7056	8.91632		26.4393	25.9827	37.0972	37.8036	35.1744	38.7394
O43913	Origin recognition complex subunit 5	ORC5	50.2831	0.00350825	0.798898		93.9498		64.5998	174.66			66.3113	55.0693	83.0478	53.0989	78.5078
O43914	TYRO protein tyrosine kinase-binding protein	TYROBP	12.1791	0.000510319	0.881591		33.0972	32.3139		74.5311	43.9017	73.219	27.7846	29.1922	34.5655
O43920	NADH dehydrogenase [ubiquinone] iron-sulfur protein 5	NDUFS5	12.5175	0.000147208	0.923089	390.956	429.545	501.977	403.861	453.947	408.323	389.695	387.447	351.862	354.9	295.794	346.547
O43924	Retinal rod rhodopsin-sensitive cGMP 3',5'-cyclic phosphodiesterase subunit delta	PDE6D	17.42	0.000117539	0.930365	220.705	181.602	220.78	268.087	230.035	225.73	212.699	234.943	234.243	218.67	207.253	186.773
O43929	Origin recognition complex subunit 4	ORC4	50.3773	0.00141089	0.829643	50.5816	83.126	42.8638	51.8075	46.3711	57.6591	71.4696	52.7054	64.2657	59.6979	38.8754	43.8803
O60216	Double-strand-break repair protein rad21 homolog	RAD21	71.6895	8.01386e-05	0.942497	222.672	172.71	166.803	185.161	123.998	157.589	165.375	183.707	162.888	176.949	178.111	151.38
O60220	Mitochondrial import inner membrane translocase subunit Tim8 A	TIMM8A	10.9984	0.000184704	0.905817	178.885	209.114	220.543	193.239	217.081	199.905	161.081	187.343	179.233	207.853	171.9	189.404
O60229	Kalirin	KALRN	340.261	0.000511818	0.881535	75.4825	67.0013	57.8958	38.5965	26.2841	46.5718	65.8795	48.8716	51.6278	54.4299	53.6676	39.3555
O60231	Pre-mRNA-splicing factor ATP-dependent RNA helicase DHX16	DHX16	119.264	7.52784e-05	0.946787	147.64	113.916	96.5811	122.087	100.598	108.777	131.261	122.232	123.876	120.612	137.639	127.646
O60232	Protein ZNRD2	ZNRD2	21.4743	0.000134812	0.926616	141.161	186.338	156.001	174.342	133.443	145.289	165.814	165.291	166.271	204.749	141.735	154.681
O60234	Glia maturation factor gamma	GMFG	16.8013	0.000128612	0.92804	123.195	96.9212	118.612	229.193	145.498	133.79	142.026	105.152	105.157	55.5523	114.3	157.559
O60237	Protein phosphatase 1 regulatory subunit 12B	PPP1R12B	110.404	9.01316e-05	0.937109	178.181	230.502	108.851	186.9	169.765	227.216	200.066	132.417	144.201	104.669	149.249	148.66
O60238	BCL2/adenovirus E1B 19 kDa protein-interacting protein 3-like	BNIP3L	23.9304	0.000938603	0.867708	45.2264	25.3699	29.4284	31.8959		47.4796	62.8976	43.6401	31.8983	48.3976	34.9482	2.76271
O60239	SH3 domain-binding protein 5	SH3BP5	50.425	0.00133486	0.840837		47.7583	41.004	68.5605			33.6845	32.6677	40.6734	51.0547	54.6288	26.357
O60244	Mediator of RNA polymerase II transcription subunit 14	MED14	160.607	0.000120317	0.929634	81.8854	87.7344	75.1683	71.8687	63.0639	70.3061	85.666	77.1727	62.1093	99.5529	52.9615	61.0946
O60256	Phosphoribosyl pyrophosphate synthase-associated protein 2	PRPSAP2	40.9257	5.46902e-05	0.965032	191.258	150.473	170.423	148.913	199.916	167.984	184.166	157.427	144.569	178.934	225.177	110.783
O60262	Guanine nucleotide-binding protein G(I)/G(S)/G(O) subunit gamma-7	GNG7	7.52175	0.000892644	0.869254	49.8035	23.7244	37.3967	44.7488	51.233	51.5179	47.6827	49.0899	26.8438	37.6169	65.5888	29.7802
O60264	SWI/SNF-related matrix-associated actin-dependent regulator of chromatin subfamily A member 5	SMARCA5	121.905	8.78938e-05	0.938002	220.271	215.068	178.887	220.689	137.924	172.576	202.296	210.708	178.226	225.528	187.682	213.235
O60266	Adenylate cyclase type 3	ADCY3	128.96	0.001326	0.846904		30.8381	31.295	26.7496	22.4077	42.6419	40.1427	21.5438	63.971	30.9104	34.4039	22.1126
O60268	Uncharacterized protein KIAA0513	KIAA0513	46.6386	0.00316822	0.800768											44.2364
O60271	C-Jun-amino-terminal kinase-interacting protein 4	SPAG9	146.205	7.75835e-05	0.94485	113.78	119.452	90.5251	120.679	107.878	108.867	95.4023	110.24	117.008	116.777	129.416	107.899
O60281	Zinc finger protein 292	ZNF292	304.816	0.00471934	0.792895	84.8782											57.5174
O60287	Nucleolar pre-ribosomal-associated protein 1	URB1	254.389	0.000385812	0.886429	45.2593	15.4952		43.2456		59.4137		34.769		58.7794		24.6855
O60291	E3 ubiquitin-protein ligase MGRN1	MGRN1	60.753	0.0012916	0.852411	34.1381	44.3474	54.3484	43.8113	55.303	48.03	69.4107	44.8722	55.6465	53.6169	31.586	44.155
O60293	Zinc finger C3H1 domain-containing protein	ZFC3H1	226.356	0.00134553	0.835472	28.7461	9.38564		52.6553		15.1593	19.2764		23.0553	33.9608	20.6374	23.4065
O60306	RNA helicase aquarius	AQR	171.295	0.000157957	0.917088	94.6265	82.9739	88.6462	87.6484	64.3284	66.2661	71.9419	79.0729	64.014	76.8354	69.8155	76.3283
O60313	Dynamin-like 120 kDa protein, mitochondrial	OPA1	111.631	7.23262e-05	0.949583	141.188	151.769	126.809	162.044	142.081	142.691	148.435	154.633	140.526	181.172	119.815	117.329
O60315	Zinc finger E-box-binding homeobox 2	ZEB2	136.447	0.000762369	0.873384	35.557	14.3002		49.9764	42.2698	38.0541	16.2427	8.62122	19.8902	10.8723		22.1919
O60318	Germinal-center associated nuclear protein	MCM3AP	218.405	0.000561334	0.879877	130.075	117.989	96	109.577	50.1025	76.1513	119.946	89.6099	104.902	119.136	96.505	103.305
O60331	Phosphatidylinositol 4-phosphate 5-kinase type-1 gamma	PIP5K1C	73.26	0.000264095	0.893774	43.6981	46.191	34.6535	50.2431	53.7241	50.1423	55.1553	42.8477	44.081	44.061	49.7377	65.5976
O60333	Kinesin-like protein KIF1B	KIF1B	204.476	0.000449356	0.883812	37.9597	34.6961	53.2952	30.5124	28.3893	38.2047	40.5373	37.5199	47.6485	41.2148	33.7502	41.216
O60341	Lysine-specific histone demethylase 1A	KDM1A	92.9026	0.00012526	0.928728	136.599	141.006	127.88	137.661	90.3937	104.404	147.065	134.633	128.779	169.922	126.697	133.291
O60343	TBC1 domain family member 4	TBC1D4	146.563	0.000139765	0.925376	38.4924	52.7222	45.8823	49.5672	57.9307	49.8303	55.9246	40.7054	35.811	40.3922	61.4254	60.466
O60353	Frizzled-6	FZD6	79.2921	0.00142751	0.828868	37.5481	31.4963		47.1562	20.6658	46.9126	18.5447	12.1261	26.6759	29.2011	36.5621	33.191
O60361	Putative nucleoside diphosphate kinase	NME2P1	15.5291	0.00525568	0.790362				307.431	323.409	286.19		260.89	278.275	275.115		414.721
O60381	HMG box-containing protein 1	HBP1	57.6453	0.00347533	0.799079				18.5939							23.4125	18.1242
O60437	Periplakin	PPL	204.747	7.07872e-05	0.958077	185.113	112.292	187.497	71.4851	78.569	79.4321	167.481	108.787	112.655	151.612	122.333	74.8397
O60443	Gasdermin-E	GSDME	54.5549	0.000115059	0.930881	107	74.9645	101.407	111.068	159.676	106.074	107.952	98.2998	112.055	83.3466	124.468	174.853
O60447	Ecotropic viral integration site 5 protein homolog	EVI5	92.9488	0.000246103	0.895445	95.3536	101.79	79.8032	84.2529	76.4019	84.5181	85.4409	69.9176	76.2239	79.0186	53.4459	75.1356
O60449	Lymphocyte antigen 75	LY75	198.311	0.00438408	0.794519	44.0253	14.3524		12.8218		28.5593		27.2172		12.2578	21.3848	40.2398
O60462	Neuropilin-2	NRP2	104.831	0.00020953	0.900106	79.5028	143.599	68.7668	86.0723	94.5769	122.715	90.7262	86.74	87.3234	89.7713	79.5586	112.014
O60476	Mannosyl-oligosaccharide 1,2-alpha-mannosidase IB	MAN1A2	73.0036	0.000109718	0.932014	134.39	154.283	144.605	164.061	158.1	133.19	156.316	154.099	159.802	164.178	89.6223	131.883
O60479	Homeobox protein DLX-3	DLX3	31.7382	0.00148157	0.826738							85.1381	83.9666		88.7952
O60486	Plexin-C1	PLXNC1	175.742	0.00628606	0.785982	60.1557	66.8103	76.4344	59.252	56.4122	86.7674		77.3899	50.4118			42.2655
O60488	Long-chain-fatty-acid--CoA ligase 4	ACSL4	79.188	7.07872e-05	0.95306	182.799	194.023	231.928	203.767	221.74	169.473	184.526	211.548	244.022	276.032	185.886	220.905
O60493	Sorting nexin-3	SNX3	18.7624	7.17522e-05	0.950297	206.819	151.198	136.262	263.973	206.605	191.765	199.316	188.865	204.378	169.5	211.045	279.616
O60496	Docking protein 2	DOK2	45.3789	0.00132732	0.846053	76.0039	59.7217	92.9729	110.505	70.1355	104.228	100.576	70.5698	96.5224	70.2974	91.2509	148.774
O60499	Syntaxin-10	STX10	28.1141	0.00121191	0.857592	75.7898	74.9964	80.1468	73.3118	59.9211	47.13	74.4477	66.7008	71.999	76.5795	55.5142	59.8328
O60502	Protein O-GlcNAcase	OGA	102.915	0.000113444	0.931219	43.2191	55.0767	47.4902	51.3811	51.7436	65.5632	49.3985	50.9652	42.8992	51.1347	65.1697	51.3322
O60504	Vinexin	SORBS3	75.3411	7.29255e-05	0.948428	180.14	137.364	87.6655	147.799	111.564	128.083	130.541	91.5646	110.078	101.926	89.3743	103.546
O60506	Heterogeneous nuclear ribonucleoprotein Q	SYNCRIP	69.6026	7.07872e-05	0.954611	413.342	329.866	429.918	448.033	400.803	398	366.971	394.48	441.2	462.954	466.905	486.37
O60507	Protein-tyrosine sulfotransferase 1	TPST1	42.1884	0.000913015	0.86855	21.3661	23.7378	20.5235	17.028	19.9031	38.6508	53.0716			31.3546		26.0031
O60508	Pre-mRNA-processing factor 17	CDC40	65.5212	0.000550113	0.880254	71.8093	60.5433	57.5642	64.3991	36.9052	64.6328	89.2835	54.6653	63.9322	46.998	42.2706	48.7371
O60512	Beta-1,4-galactosyltransferase 3	B4GALT3	43.928	0.00090631	0.868797	23.3178			32.4119	17.4285	36.2947	39.9992	47.4043	39.9825	29.7765		22.3455
O60513	Beta-1,4-galactosyltransferase 4	B4GALT4	40.0411	0.0001492	0.922104	98.5731	126.061	97.0141	92.5033	134.762	114.765	95.8892	128.359	104.316	93.0133	104.323	106.943
O60518	Ran-binding protein 6	RANBP6	124.714	0.00207177	0.811231	35.1748	21.0154	15.7932		39.042	36.9686	35.4958	24.7887	27.7698	47.03	28.0884	26.5753
O60524	Nuclear export mediator factor NEMF	NEMF	122.954	0.000500687	0.881913	37.2744	37.0552	40.5636	27.2025	31.5685	39.7933	32.9491	36.9182	32.1976	27.7837	45.854	35.123
O60547	GDP-mannose 4,6 dehydratase	GMDS	41.9497	0.000136616	0.926151	178.5	156.352	179.432	174.414	223.378	191.574	179.179	136.538	153.559	146.276	198.626	218.956
O60551	Glycylpeptide N-tetradecanoyltransferase 2	NMT2	56.9802	0.000157957	0.917083	62.8842	40.5472		93.7598	77.9533	100.583	78.2999	56.0254	39.4465	40.1498	59.2345	72.2719
O60563	Cyclin-T1	CCNT1	80.6846	0.00199434	0.812947	21.5112	9.44728	10.2383	3.89726		7.41683	9.18933			10.19		11.3919
O60568	Multifunctional procollagen lysine hydroxylase and glycosyltransferase LH3	PLOD3	84.7852	6.00598e-08	0.983393	214.006	205.473	184.577	183.402	224.018	183.308	222.98	155.232	192.233	202.335	269.008	194.962
O60573	Eukaryotic translation initiation factor 4E type 2	EIF4E2	28.362	0.00137016	0.832304		64.6493	86.9733	39.6933	72.423	62.1135	68.9365	69.2347	84.3581	58.7401		62.2705
O60583	Cyclin-T2	CCNT2	81.0289	0.00118467	0.858804	38.3775	2.81068		23.6145	5.63734	5.72727	8.17385	17.7996	14.4551	10.6878	14.3415	33.8135
O60603	Toll-like receptor 2	TLR2	89.8376	0.0013208	0.848483	38.5709	24.3489	36.6301	40.5299	27.0625	36.7442	59.1846	31.7469		70.2137		26.0772
O60610	Protein diaphanous homolog 1	DIAPH1	141.347	4.05208e-05	0.967268	135.777	132.202	158.515	130.269	140.589	126.056	128.398	171.207	173.448	190.449	171.648	119.349
O60613	Selenoprotein F	SELENOF	18.0918	8.33901e-05	0.940152	269.46	257.885	384.505	353.177	340.927	273.886	281.445	272.689	358.168	331.164	309.908	273.308
O60641	Clathrin coat assembly protein AP180	SNAP91	92.5022	0.000575735	0.879409
O60645	Exocyst complex component 3	EXOC3	85.5674	0.000175747	0.908814	91.7075	113.224	105.952	105.452	111.215	125.06	114.73	134.415	131.136	134.571	96.0488	93.3657
O60658	High affinity cAMP-specific and IBMX-insensitive 3',5'-cyclic phosphodiesterase 8A	PDE8A	93.304	0.00148511	0.826612	20.9841	19.1576	7.04279	26.7088	26.9092	22.4839		19.6103	50.6783	43.9145		21.473
O60664	Perilipin-3	PLIN3	47.075	6.53297e-05	0.962898	268.024	226.314	187.227	263.156	235.626	270.124	255.112	263.414	301.826	291.966	315.356	321.329
O60675	Transcription factor MafK	MAFK	17.5231	0.000172287	0.910043	105.937	97.6463	91.4947	118.336	65.3816	72.0253	127.033	99.939	108.815	105.646	72.0534	66.7884
O60678	Protein arginine N-methyltransferase 3	PRMT3	59.9032	0.00133774	0.837596	14.6652	42.1387	33.1316		29.796	38.5665		37.2073		25.8976	36.5629	30.5275
O60684	Importin subunit alpha-7	KPNA6	60.0295	5.49082e-05	0.965003	256.82	245.792	203.79	211.492	120.044	184.424	193.763	216.366	267.5	240.454	200.31	263.705
O60687	Sushi repeat-containing protein SRPX2	SRPX2	52.9719	0.00167606	0.820977	134.02	158.101			161.902	107.198	131.596	107.381			170.995	113.891
O60701	UDP-glucose 6-dehydrogenase	UGDH	55.0241	7.07872e-05	0.951965	238.793	257.999	146.548	190.874	182.341	306.315	460.767	171.612	159.853	148.633	534.428	322.388
O60704	Protein-tyrosine sulfotransferase 2	TPST2	41.9118	0.00100012	0.86561	75.7413	59.5514	102.184	71.7675	77.0243	73.0702	85.9497	75.223	81.7837	68.3123	66.5551	64.2339
O60706	ATP-binding cassette sub-family C member 9	ABCC9	174.223	0.00555707	0.789043		93.966		22.2172				20.1754				139.365
O60716	Catenin delta-1	CTNND1	108.17	1.4977e-05	0.971765	270.708	219.989	181.516	230.209	175.87	176.309	195.816	209.941	241.281	247.077	176.597	208.03
O60725	Protein-S-isoprenylcysteine O-methyltransferase	ICMT	31.9381	0.000178189	0.907976	76.9144	76.8	63.3789	71.3333	77.852	51.4618	63.9526	61.0707	70.2656	121.176	42.6921	44.6941
O60749	Sorting nexin-2	SNX2	58.4711	5.66371e-05	0.964768	235.771	262.488	194.95	331.769	279.768	296.753	286.896	270.443	240.995	241.428	332.442	373.577
O60760	Hematopoietic prostaglandin D synthase	HPGDS	23.3439	0.000148656	0.922276	117.349	95.8157	42.265	232.349	97.1067	305.092	114.197	100.345	109.52	104.453	121.399	352.738
O60762	Dolichol-phosphate mannosyltransferase subunit 1	DPM1	29.6343	9.95271e-05	0.934321	247.362	241.253	268.991	192.411	257.579	240.32	206.724	235.738	249.91	279.314	188.237	205.144
O60763	General vesicular transport factor p115	USO1	107.895	7.07872e-05	0.953766	233.196	204.635	208.41	243.546	198.727	261.395	252.945	244.477	280.444	233.918	338.514	287.534
O60779	Thiamine transporter 1	SLC19A2	55.4001	0.00127882	0.853468	212.749	45.8941	202.899	204.699	193.771	182.272	273.187	132.095	183.615	174.082	129.046	75.5619
O60783	28S ribosomal protein S14, mitochondrial	MRPS14	15.1387	0.00015784	0.917382	61.9074	55.263	43.1359	78.2323	65.0048	46.046	57.8517	62.3675	57.33	51.2427	39.2142	56.5737
O60784	Target of Myb protein 1	TOM1	53.8184	7.29937e-05	0.948357	280.826	294.861	271.437	271.999	199.635	266.97	256.534	310.07	379.436	385.129	273.702	275.779
O60825	6-phosphofructo-2-kinase/fructose-2,6-bisphosphatase 2	PFKFB2	58.4768	0.00134279	0.836154	36.9778	23.1411		48.1385	47.2098	47.6209		54.574	58.9562	43.3316	46.033	54.0577
O60826	Coiled-coil domain-containing protein 22	CCDC22	70.7556	7.07872e-05	0.958816	98.6521	110.432	127.405	124.379	127.907	117.144	106.389	126.4	137.204	130.43	155.067	126.583
O60828	Polyglutamine-binding protein 1	PQBP1	30.4722	0.000201001	0.901615	228.051	159.816	88.3979	192.309	113.813	145.535	129.075	184.01	158.2	194.499	148.571	175.35
O60830	Mitochondrial import inner membrane translocase subunit Tim17-B	TIMM17B	18.273	9.72536e-05	0.934894	246.984	206.085	94.1775	178.9	217.621	181.522	128.432	210.069	235.732	284.5	147.206	177.191
O60831	PRA1 family protein 2	PRAF2	19.2579	0.000113091	0.931304	444.635	568.616	512.535	379.215	302.702	404.527	482.717	360.892	336.55	335.052	320.929	354.035
O60832	H/ACA ribonucleoprotein complex subunit DKC1	DKC1	57.6741	0.000125693	0.928652	121.629	118.594	113.345	120.568	116.575	127.758	129.302	136.573	139.976	142.802	101.814	114.972
O60841	Eukaryotic translation initiation factor 5B	EIF5B	138.827	2.27538e-05	0.970163	94.7275	90.393	110.948	106.903	100.693	104.865	88.8454	101.679	121.331	119.162	118.192	115.207
O60861	Growth arrest-specific protein 7	GAS7	54.3714	0.000424495	0.884778	72.1432	113.051	65.865	94.2496	91.136	88.189	99.5664	76.5617	75.4292	116.071	121.85	88.6302
O60869	Endothelial differentiation-related factor 1	EDF1	16.3687	0.000175764	0.908779	179.905	150.09	204.418	190.151	173.713	222.428	180.195	179.179	241.818	215.779	130.934	250.112
O60870	DNA/RNA-binding protein KIN17	KIN	45.3737	0.0015742	0.82384	38.876	28.87	30.6057	48.7472	36.3121	38.392	40.469	25.4019	29.1927	49.3471	43.9829	25.6975
O60879	Protein diaphanous homolog 2	DIAPH2	125.569	0.00012417	0.928916	75.5709	82.1116	69.4309	83.4369	68.649	61.8833	76.0177	94.7949	47.3004	95.2701	91.027	72.2993
O60884	DnaJ homolog subfamily A member 2	DNAJA2	45.7456	0.00014821	0.922548	148.923	159.442	134.901	141.594	134.432	149.553	128.386	170.322	144.211	159.406	119.565	133.701
O60885	Bromodomain-containing protein 4	BRD4	152.219	0.000164886	0.913053	141.352	126.366	97.1214	123.828	64.7296	74.3606	102.979	88.7548	70.9473	99.4855	105.957	130.215
O60888	Protein CutA	CUTA	19.1163	4.9108e-05	0.966032	132.405	123.931	133.639	166.269	172.932	159.167	193.954	123.793	109.516	127.473	221.502	179.221
O60890	Oligophrenin-1	OPHN1	91.6407	0.000254343	0.894635	44.3665	55.3077	49.3804	44.7967	40.3854	54.9591	45.5863	48.5622	70.3434	47.5189	25.7807	39.7704
O60895	Receptor activity-modifying protein 2	RAMP2	19.6077	0.00175625	0.818892	16.4087	31.6023			10.8689	6.83227						25.244
O60906	Sphingomyelin phosphodiesterase 2	SMPD2	47.6456	0.000157841	0.917285	81.4158	89.1433	97.9113	60.5205	66.8204	98.238	98.9802	95.6349	102.454	121.648	56.7013	101.212
O60907	F-box-like/WD repeat-containing protein TBL1X	TBL1X	62.4957	8.32169e-05	0.940244	107.05	112.474	65.0447	123.046	86.2234	114.023	111.541	89.6842	107.416	109.452	94.0295	111.923
O60911	Cathepsin L2	CTSV	37.3293	0.00122628	0.856922	33.6387	24.4235		17.8076		19.1427	18.9212	33.9112	29.9931	23.9861	21.4669	23.4262
O60921	Checkpoint protein HUS1	HUS1	31.6909	0.000439122	0.884223	53.7673	44.4396	83.0623	56.8221	63.7561	73.507	43.9226	59.0951	51.3414	56.1073	52.0712	60.8128
O60925	Prefoldin subunit 1	PFDN1	14.2105	7.07872e-05	0.959331	417.888	468.352	531.446	528.9	550.991	446.395	487.889	594.181	452.915	562.938	541.973	430.163
O60927	E3 ubiquitin-protein ligase PPP1R11	PPP1R11	13.9525	0.000158451	0.916708	30.4587	58.6386	52.5912	42.6402	52.2522	45.204	54.3973	45.404	42.5667	55.4624	47.5605	62.7023
O60930	Ribonuclease H1	RNASEH1	32.0642	0.00608249	0.786814				12.4382			9.15531	11.3206	18.4651			6.32949
O60934	Nibrin	NBN	84.959	0.000293437	0.891586	111.993	102.138	71.1997	91.3418	81.6295	74.2473	76.2218	70.5481	63.4421	68.2774	104.734	111.043
O60936	Nucleolar protein 3	NOL3	22.6294	0.00114233	0.860534	49.5087		34.3848	51.9457	65.8629	60.5993	54.2424	34.0906	63.8733	33.428	75.6617	57.3783
O60941	Dystrobrevin beta	DTNB	71.3556	0.00327572	0.800168	3.95211	32.5271			2.02925		57.5533		2.78184	31.6324	7.46044	50.0084
O60942	mRNA-capping enzyme	RNGTT	68.5567	0.000218278	0.898766	69.3023	132.594	91.6008	84.8907	73.5878	50.4491	68.2621	61.1034	92.4325	91.6421	77.7622	75.7632
O75022	Leukocyte immunoglobulin-like receptor subfamily B member 3	LILRB3	69.3859	0.00782973	0.77999		48.7103		19.7528
O75023	Leukocyte immunoglobulin-like receptor subfamily B member 5	LILRB5	64.126	0.00134321	0.835956	25.228	57.7762	21.9642	42.4331		38.2882	32.3858	22.5482	27.0101	35.2928	25.8478	25.1454
O75027	Iron-sulfur clusters transporter ABCB7, mitochondrial	ABCB7	82.6413	0.000145476	0.923601	115.474	123.729	111.478	141.626	123.046	103.246	126.561	133.095	105.644	155.796	77.7359	94.6907
O75044	SLIT-ROBO Rho GTPase-activating protein 2	SRGAP2	120.871	7.27953e-05	0.948666	63.346	68.9883	68.9008	67.2516	68.3132	66.979	66.152	71.1875	79.648	73.3882	75.9933	66.6436
O75051	Plexin-A2	PLXNA2	211.104	0.00132778	0.845269	86.6707	82.6509	57.5939	80.622	100.019	84.7373	74.4862	93.221	114.064	105.567	82.3096	70.7476
O75052	Carboxyl-terminal PDZ ligand of neuronal nitric oxide synthase protein	NOS1AP	56.1498	0.00429223	0.794979	22.768	30.4902		19.2792	23.6595		29.6945				23.2486	14.5254
O75054	Immunoglobulin superfamily member 3	IGSF3	135.196	6.00842e-05	0.964033	74.3354	75.102	136.754	85.6038	82.7928	65.2243	87.811	155.42	116.994	141.809	107.544	67.3169
O75061	Putative tyrosine-protein phosphatase auxilin	DNAJC6	99.9965	0.00106734	0.86335	143.275	84.1504	154.892	131.564	136.109	102.95	114.374	139.439	130.051	107.94	138.165	106.291
O75063	Glycosaminoglycan xylosylkinase	FAM20B	46.4325	0.000549866	0.880265	85.8553	81.7539	74.4437	78.5468	87.8952	76.9682	79.1888	75.7766	82.7111	70.3792	59.8021	68.1381
O75064	DENN domain-containing protein 4B	DENND4B	163.847	0.00211661	0.810351	104.263	119.81		101.922	130.296		146.149	139.402		142.068	169.147	135.907
O75069	Transmembrane and coiled-coil domains protein 2	TMCC2	77.4486	0.0029101	0.80235	28.0336	44.8286	17.9009	24.702	13.0908	20.4907	29.1858		31.3815	40.3093	24.918
O75071	EF-hand calcium-binding domain-containing protein 14	EFCAB14	55.0315	0.00133645	0.838326	65.2284			15.2672	38.8017	26.0178	32.6548	35.3213	46.1114	87.0358		13.7728
O75083	WD repeat-containing protein 1	WDR1	66.1935	7.07872e-05	0.957649	475.248	489.926	442.097	492.71	525.71	618.68	575.507	409.132	419.105	321.195	644.378	533.829
O75094	Slit homolog 3 protein	SLIT3	167.713	0.0015893	0.823386	20.7376	10.1403		22.4254	13.3149	29.4914			14.1876	20.1764	13.05	18.9301
O75112	LIM domain-binding protein 3	LDB3	77.1349	0.000302885	0.890958	91.5093	30.1381		36.5723	31.1271	82.3578		39.537	34.1483			34.3526
O75113	NEDD4-binding protein 1	N4BP1	100.379	0.00162307	0.822476	51.4816	71.5179		33.2967	40.1089	57.8676	48.3522	32.4871	39.8685	34.0596	35.059	37.8181
O75116	Rho-associated protein kinase 2	ROCK2	160.9	8.30353e-05	0.940361	125.226	137.817	90.9981	134.049	139.204	141.736	117.54	122.242	107.021	102.532	160.42	113.702
O75122	CLIP-associating protein 2	CLASP2	141.064	0.000169154	0.911236	69.6242	70.9434	56.8002	67.3131	59.6761	57.5756	58.3432	49.9769	63.7491	59.1371	52.9648	67.5455
O75123	Zinc finger protein 623	ZNF623	61.3931	0.00964146	0.773436		53.5416			26.5264	52.0931				42.8695
O75128	Protein cordon-bleu	COBL	135.617	0.00135461	0.833776	32.0633	30.4165	43.6105	32.3346	30.0319	29.1661	25.8114	36.9053	31.3148	48.5103	36.4005	30.4077
O75131	Copine-3	CPNE3	60.1306	7.07872e-05	0.952543	299.017	348.023	262.313	257.809	268.736	314.189	254.326	267.047	263.672	254.508	215.56	264.171
O75132	Zinc finger BED domain-containing protein 4	ZBED4	130.322	0.0016313	0.82223	161.389		144.605	87.6773	166.943	114.217		121.984	103.707	100.716	272.888	223.774
O75140	GATOR complex protein DEPDC5	DEPDC5	181.264	0.00151839	0.825535	37.7231		22.5878	33.0151	28.0693	49.6173			49.449	58.3758		36.5114
O75144	ICOS ligand	ICOSLG	33.3488	0.00133803	0.837365		40.6685				47.7288			13.7548			57.2119
O75146	Huntingtin-interacting protein 1-related protein	HIP1R	119.388	0.00126227	0.854701	48.3564	32.1889	68.0813	53.1868	30.2513	46.9116	56.4562	43.905	60.1301	35.2289	40.4228	50.5293
O75147	Obscurin-like protein 1	OBSL1	206.947	0.00410146	0.795912	59.6092	68.6345	64.4426	73.4006	68.8519	58.8787	86.9382		61.1293	57.6491		56.5886
O75150	E3 ubiquitin-protein ligase BRE1B	RNF40	113.678	0.000112628	0.931402	85.9522	79.2087	70.9878	74.2892	51.0985	71.5653	76.5512	80.4789	79.1976	81.6601	88.2718	81.1012
O75151	Lysine-specific demethylase PHF2	PHF2	120.775	0.000206834	0.900586	90.1819	75.2016	82.0992	88.8938	53.3717	70.615	76.1832	72.382	70.9949	85.1387	64.8124	68.8472
O75152	Zinc finger CCCH domain-containing protein 11A	ZC3H11A	89.1311	0.000311539	0.890389	67.4719	34.3815	30.0456	70.258	30.5791	34.8744		36.0715	49.4971	58.0567	37.3635	58.2445
O75153	Clustered mitochondria protein homolog	CLUH	146.67	0.000399739	0.885797	58.2563	66.8595	78.1281	74.3272	96.4724	64.6308	84.8438	84.7574	68.6336	79.5013	81.8901	99.2585
O75157	TSC22 domain family protein 2	TSC22D2	79.2282	9.18415e-05	0.936475	68.7524	73.1603	86.8433	59.1052	41.3953	51.2369	58.7726	56.2086	76.7202	72.3183	66.9613	61.9947
O75164	Lysine-specific demethylase 4A	KDM4A	120.662	0.00135461	0.8338	37.8979	4.41335	7.30796	10.3576		9.9518	73.1862			86.9212
O75165	DnaJ homolog subfamily C member 13	DNAJC13	254.415	7.5896e-05	0.946227	144.913	148.716	127.584	137.377	162.382	140.136	123.579	140.334	141.924	152.136	96.9667	119.604
O75167	Phosphatase and actin regulator 2	PHACTR2	69.6996	7.44476e-05	0.947395	80.545	99.1472	54.6361	102.867	90.3808	106.69	91.6902	68.6137	61.0943	57.3381	121.006	103.596
O75170	Serine/threonine-protein phosphatase 6 regulatory subunit 2	PPP6R2	104.942	0.000165178	0.912973	37.8347	45.4652	37.1224	46.2483	35.3504	42.3486	43.6755	43.3176	43.4863	44.4177	50.7019	35.308
O75175	CCR4-NOT transcription complex subunit 3	CNOT3	81.872	0.000172287	0.910026	64.0595	85.0908	81.491	59.2958	76.9386	90.1604	80.4425	54.8937	74.5972	54.8969	63.1216	80.2893
O75177	Calcium-responsive transactivator	SS18L1	42.9904	0.00930737	0.774592	20.4896	1.27626	16.5106	20.3723		11.219		4.40466		8.52268		16.0431
O75179	Ankyrin repeat domain-containing protein 17	ANKRD17	274.258	0.000209005	0.90021	73.8192	66.208	68.77	73.2096	68.6869	65.8577	56.0939	63.4734	70.1878	72.8333	55.3755	78.4106
O75182	Paired amphipathic helix protein Sin3b	SIN3B	133.066	0.000294794	0.891483	78.7154	60.1937	48.7175	63.7695		64.4148	49.6579	48.2163	63.5669	70.1963	51.8424	73.0626
O75190	DnaJ homolog subfamily B member 6	DNAJB6	36.087	0.000381167	0.886651	134.653	91.2753	145.972	148.519	108.336	117.686	148.896	139.379	81.536	102.202	103.294	116.795
O75204	Transmembrane protein 127	TMEM127	25.8418	0.00127656	0.853733	32.7897	42.45			50.0666	31.8708	45.2688		38.0437	30.8877	26.4423	47.7909
O75208	Ubiquinone biosynthesis protein COQ9, mitochondrial	COQ9	35.509	7.65639e-05	0.945832	71.3969	81.0796	69.0428	81.9757	62.9369	74.1442	68.6806	66.2527	68.0201	68.3495	47.9074	47.7097
O75223	Gamma-glutamylcyclotransferase	GGCT	21.0077	7.52784e-05	0.946981	397.641	275.006	469.623	552.28	509.49	420.931	476.354	394.618	407.833	250.98	426.998	626.966
O75251	NADH dehydrogenase [ubiquinone] iron-sulfur protein 7, mitochondrial	NDUFS7	23.5635	0.000166907	0.912079	440.617	392.004	526.319	457.198	530.061	421.094	473.657	412.622	455.48	436.183	282.814	341.34
O75298	Reticulon-2	RTN2	59.2638	0.00133853	0.837147	122.439	88.1711	57.2641	151.671	151.563	126.619	121.114	167.807	119.745		118.492	116.894
O75306	NADH dehydrogenase [ubiquinone] iron-sulfur protein 2, mitochondrial	NDUFS2	52.5456	0.000155031	0.919525	298.182	320.719	326.731	312.388	371.454	293.688	314.143	289.051	291.294	312.357	225.414	260.075
O75312	Zinc finger protein ZPR1	ZPR1	50.9253	0.000489295	0.882325	23.521	34.5448	24.6925	42.5626	53.1234	47.3788	83.5461	37.1856	43.4038		50.4768	40.5217
O75317	Ubiquitin carboxyl-terminal hydrolase 12	USP12	42.8578	0.0055584	0.789031		23.8684	30.7109		30.5327	21.7945		21.3773		23.6308		23.8208
O75323	Protein NipSnap homolog 2	NIPSNAP2	33.7426	0.000142695	0.924491	149.26	153.989	149.834	160.738	199.854	135.786	108.89	153.449	128.916	157.817	115.762	124.534
O75326	Semaphorin-7A	SEMA7A	74.8238	9.02173e-05	0.937058	74.3582	82.0396	156.256	48.152	56.5407	68.5397	105.123	100.926	80.156	93.0552	122.349	79.1403
O75339	Cartilage intermediate layer protein 1	CILP	132.565	8.69735e-05	0.938407		93.8961	98.042				96.3872				103.194	46.2496
O75340	Programmed cell death protein 6	PDCD6	21.8685	7.07872e-05	0.955198	153.9	147.313	148.893	129.924	147.614	115.779	140.416	143.191	142.21	147.391	115.867	98.5339
O75347	Tubulin-specific chaperone A	TBCA	12.8548	2.42477e-05	0.969898	639.264	559.633	732.673	800.565	755.46	782.119	918.234	628.894	623.197	453.085	823.506	852.542
O75348	V-type proton ATPase subunit G 1	ATP6V1G1	13.7575	0.000221231	0.898375	212.249	208.903	340.223	246.164	230.421	213.477	235.914	221.118	217.403	235.066	217.88	178.924
O75351	Vacuolar protein sorting-associated protein 4B	VPS4B	49.3021	7.07872e-05	0.95352	144.268	130.55	142.796	167.66	179.96	148.202	170.438	131.779	138.405	107.783	140.712	170.985
O75352	Mannose-P-dolichol utilization defect 1 protein	MPDU1	26.6378	8.71356e-05	0.938349	2445.09	2541	2213.82	2161.93	2770.38	2243.18	2006.91	2341.51	2929.82	2513.59	1797.44	2049.67
O75356	Ectonucleoside triphosphate diphosphohydrolase 5	ENTPD5	47.5173	0.000843693	0.870812	10.2798	11.5816	10.7507	14.7507	22.6006			5.4255		14.7775	28.2298	23.3515
O75362	Zinc finger protein 217	ZNF217	115.272	0.00644512	0.785355	13.3808						17.5142					14.0125
O75367	Core histone macro-H2A.1	MACROH2A1	39.617	7.52784e-05	0.946833	546.138	545.478	595.161	579.57	504.523	490.169	581.613	546.79	498.286	644.913	416.496	411.09
O75368	SH3 domain-binding glutamic acid-rich-like protein	SH3BGRL	12.7743	7.07872e-05	0.956697	585.775	521.385	561.107	840.896	592.649	739.151	767.72	470.663	381.271	335.701	540.906	797.81
O75369	Filamin-B	FLNB	278.164	3.56655e-05	0.968079	553.35	540.567	631.185	453.372	390.891	453.84	465.299	418.536	375.352	382.535	708.072	484.375
O75376	Nuclear receptor corepressor 1	NCOR1	270.21	0.000291617	0.891718	88.86	34.3397	81.7867	63.9379	33.4911	26.2104		26.1109	48.5767	47.9999	45.6239	57.7763
O75379	Vesicle-associated membrane protein 4	VAMP4	16.3968	0.00117058	0.859352	64.2533	66.5655	54.0561	60.7617	59.3586	52.0372	46.901	55.7791	53.1224	48.3414	43.3623	41.0245
O75380	NADH dehydrogenase [ubiquinone] iron-sulfur protein 6, mitochondrial	NDUFS6	13.7116	0.000151628	0.921114	85.3089	92.1384	81.6224	73.196	88.8005	69.2404	74.6161	85.1423	63.4234	72.2701	63.4477	67.1881
O75381	Peroxisomal membrane protein PEX14	PEX14	41.2366	0.0001618	0.914617	318.179	221.05	159.09	159.824	116.2	116.708	185.599	117.548	123.867	208.415	121.3	146.365
O75382	Tripartite motif-containing protein 3	TRIM3	80.8295	0.000711924	0.875015	90.2202	101.425	43.9057	64.1066	82.252	58.1178	47.4051	71.458	48.5392	50.6538	62.6024	49.7172
O75390	Citrate synthase, mitochondrial	CS	51.7124	8.98261e-05	0.937238	291.74	356.338	343.684	385.405	341.742	323.703	337.034	321.421	312.453	376.66	279.939	287.157
O75391	Sperm-associated antigen 7	SPAG7	26.0344	0.000221548	0.89832	110.585	103.534	102.782	124.549	97.6585	109.321	88.0076	103.26	100.71	95.9686	142.223	100.833
O75394	39S ribosomal protein L33, mitochondrial	MRPL33	7.61917	0.000903632	0.868886	118.674	112.994	160.379	160.572	182.558	125.736	144.647	124.396	133.116	167.957	104.751	121.166
O75396	Vesicle-trafficking protein SEC22b	SEC22B	24.7406	0.000114887	0.930915	795.311	785.07	696.086	831.43	640.435	787.8	846.673	839.754	906.008	711.008	531.439	756.917
O75400	Pre-mRNA-processing factor 40 homolog A	PRPF40A	108.805	8.12038e-05	0.94178	156.896	142.214	125.427	161.156	117.659	102.185	128.611	111.964	115.144	163.655	142.084	148.038
O75410	Transforming acidic coiled-coil-containing protein 1	TACC1	87.7943	9.5904e-05	0.935259	81.6809	79.8259	84.6717	78.5792	79.3942	76.7755	73.9707	74.2962	81.814	95.6709	83.4365	87.0009
O75414	Nucleoside diphosphate kinase 6	NME6	21.1422	0.00124675	0.855833	6.42684	12.6463		8.79375	26.8404	27.5066		21.6094		21.1506	44.0064	19.3485
O75420	GRB10-interacting GYF protein 1	GIGYF1	114.601	0.00106239	0.863523		104.835	190.629	215.207				85.0315	80.8328	94.757		124.239
O75427	Leucine-rich repeat and calponin homology domain-containing protein 4	LRCH4	73.4503	0.000162224	0.914375	108.706	102.069	92.216	91.7482	74.3585	88.7959	113.509	107.024	89.2973	103.128	106.273	98.3437
O75431	Metaxin-2	MTX2	29.7632	0.000143691	0.924084	135.996	106.674	158.925	135.59	146.819	127.662	147.416	121.551	126.345	125.962	107.867	95.4647
O75436	Vacuolar protein sorting-associated protein 26A	VPS26A	38.1699	6.13973e-05	0.96375	294.472	292.178	274.298	332.019	369.437	349.584	314.372	353.124	373.91	330.384	418.588	344.754
O75438	NADH dehydrogenase [ubiquinone] 1 beta subcomplex subunit 1	NDUFB1	6.9612	0.000137963	0.925817	861.599	715.984	966.83	867.048	1015.19	863.802	870.684	840.726	765.98	747.274	749.899	651.717
O75439	Mitochondrial-processing peptidase subunit beta	PMPCB	54.3661	8.38017e-05	0.939937	242.851	238.151	223.517	276.044	236.552	229.139	212.568	227.339	233.938	275.57	198.558	204.69
O75446	Histone deacetylase complex subunit SAP30	SAP30	23.3062	0.00658092	0.784815	42.5864	68.2166		44.871		65.8804		44.8681		73.3614		57.7291
O75448	Mediator of RNA polymerase II transcription subunit 24	MED24	110.305	0.00132778	0.845368	46.7531	48.9448	43.666	39.6344	47.0958	47.7328	52.1269	43.9547	44.6778	33.5187		37.5393
O75460	Serine/threonine-protein kinase/endoribonuclease IRE1	ERN1	109.735	0.000633651	0.877526	69.464	60.1517	39.3659	166.64	74.0705	77.1913	71.1023	92.5145	78.879	100.896	89.2691	33.3074
O75475	PC4 and SFRS1-interacting protein	PSIP1	60.1032	9.54809e-05	0.935403	239.881	228.929	197.363	264.167	221.253	187.549	175.81	199.634	177.536	146.315	190.941	227.409
O75477	Erlin-1	ERLIN1	39.1711	7.07872e-05	0.956798	198.236	199.749	211.468	186.133	197.654	171.347	208.343	217.576	179.202	189.988	162.811	135.976
O75486	Transcription initiation protein SPT3 homolog	SUPT3H	35.7928	0.00124526	0.855914	56.142	30.3559		33.4439		29.3967	55.3039			62.5641	58.447	30.8423
O75487	Glypican-4	GPC4	62.4121	8.4697e-05	0.939558	57.2785	110.04	58.4913	75.484	56.8519	108.903	59.0229	58.1562	43.5408	42.8718	66.8464	76.2517
O75489	NADH dehydrogenase [ubiquinone] iron-sulfur protein 3, mitochondrial	NDUFS3	30.2415	8.06133e-05	0.942132	248.716	224.782	226.614	225.823	264.688	221.317	191.299	214.434	215.718	227.307	159.721	165.699
O75494	Serine/arginine-rich splicing factor 10	SRSF10	31.3005	7.07872e-05	0.956347	403.639	382.799	366.754	420.727	324.104	341.411	334.635	366.084	359.187	455.873	309.617	370.611
O75503	Ceroid-lipofuscinosis neuronal protein 5	CLN5	41.4966	0.00147171	0.827104	132.53	94.4783	133.088	131.36	67.2633	142.485	196.401		133.853		124.886	112.922
O75506	Heat shock factor-binding protein 1	HSBP1	8.54357	0.000539047	0.880628	365.416	349.338	468.7	426.91	350.075	350.032	323.361	369.761	357.873	366.94	324.528	298.602
O75508	Claudin-11	CLDN11	21.9932	0.00123266	0.856605	20.5716	20.3163		31.1375	30.3595	20.089	8.5034	35.0208	20.7035			13.3201
O75521	Enoyl-CoA delta isomerase 2	ECI2	43.5851	0.000147113	0.923163	72.196	123.808	115.095	84.521	124.432	91.6344	92.2135	71.7213	87.8307	72.1293	70.234	94.3008
O75529	TAF5-like RNA polymerase II p300/CBP-associated factor-associated factor 65 kDa subunit 5L	TAF5L	66.1553	0.000649413	0.877029	60.102	36.0211	33.959	51.4002	43.0377	46.8766	26.126	32.2673	43.4083	35.403	41.4448	36.299
O75530	Polycomb protein EED	EED	50.1977	0.000795325	0.87235	78.4766	68.7905	78.7675	65.8616	63.3386	71.3274	71.2412	61.3759	67.5521	76.6319	44.3081	58.4099
O75531	Barrier-to-autointegration factor	BANF1	10.0586	7.07872e-05	0.952525	119.901	112.549	160.324	127.219	93.742	118.538	156.669	80.841	98.7484	89.2945	59.7801	76.8113
O75533	Splicing factor 3B subunit 1	SF3B1	145.83	4.16278e-05	0.967112	210.817	170.481	134.994	184.375	117.949	133.567	148.605	132.611	148.398	191.353	167.148	178.256
O75534	Cold shock domain-containing protein E1	CSDE1	88.8847	7.94491e-05	0.943439	147.921	146.977	141.333	161.054	142.928	147.177	137.068	148.723	180.715	186.017	156.062	176.61
O75554	WW domain-binding protein 4	WBP4	42.5068	0.00133486	0.841527	113.302	53.2493	48.3006	79.5542	64.2977	76.9064	74.5349	43.3503	43.3731	27.5418	35.917	51.5632
O75558	Syntaxin-11	STX11	33.1958	8.301e-05	0.94051	207.111	198.858	218.272	243.474	107.965	172.917	220.939	215.761	228.247	290	153.377	147.371
O75563	Src kinase-associated phosphoprotein 2	SKAP2	41.2168	0.0013361	0.839066	78.1119	77.6481	110.663	72.1512	56.0325	80.2936	92.6385	57.314	36.3345	43.051	92.273	76.2482
O75569	Interferon-inducible double-stranded RNA-dependent protein kinase activator A	PRKRA	34.4042	0.000122092	0.929313	129.69	103.925	114.311	119.391	182.717	149.845	154.384	126.106	199.966	118.662	101.881	167.929
O75581	Low-density lipoprotein receptor-related protein 6	LRP6	180.429	0.0030744	0.80132	44.1964			38.0842	63.1337	49.0937	22.3442	40.1222	47.3825	27.002	49.0641	42.888
O75582	Ribosomal protein S6 kinase alpha-5	RPS6KA5	89.8654	0.000113444	0.931235	118.563	83.3392	101.753	95.1491	53.8934	94.9378	78.3305	103.01	133.759	81.5804	75.5329	111.849
O75592	E3 ubiquitin-protein ligase MYCBP2	MYCBP2	513.636	0.000603223	0.878513	49.4089	50.6041	49.7532	45.982	44.9393	56.019	56.0764	44.6491	54.5696	50.6529	37.3761	40.9534
O75594	Peptidoglycan recognition protein 1	PGLYRP1	21.7308	0.00447217	0.794089						2.37865	18.9923					3.92235
O75608	Acyl-protein thioesterase 1	LYPLA1	24.6696	8.74153e-06	0.973489	195.235	197.88	275.224	248.44	230.499	213.026	259.263	159.992	164.682	181.764	190.734	229.8
O75616	GTPase Era, mitochondrial	ERAL1	48.3501	0.00385352	0.797147		152.035	372.025		99.5918				259.674	77.2543
O75636	Ficolin-3	FCN3	32.903	0.000123473	0.929055	156.943	88.9366	36.6039	112.646	65.0425	98.599	137.32	93.5477	121.885	107.993	195.692	50.7032
O75643	U5 small nuclear ribonucleoprotein 200 kDa helicase	SNRNP200	244.508	5.46902e-05	0.965066	182.634	180.795	197.075	183.322	160.632	162.869	171.111	190.287	177.82	212.377	179.818	165.069
O75663	TIP41-like protein	TIPRL	31.444	0.000156584	0.918329	96.5584	90.0897	82.0538	108.042	108.272	105.156	86.2538	79.3084	83.1231	78.9569	90.9974	116.056
O75676	Ribosomal protein S6 kinase alpha-4	RPS6KA4	85.6058	0.000210145	0.900009	139.614	134.218	104.226	139.274	172.739	122.559	149.43	123.569	123.618	115.177	90.3263	138.545
O75688	Protein phosphatase 1B	PPM1B	52.6426	0.000145467	0.923616	106.288	106.252	115.382	118.22	141.294	130.099	120.234	118.352	99.9277	94.3451	114.395	120.531
O75689	Arf-GAP with dual PH domain-containing protein 1	ADAP1	43.3953	0.00132943	0.844503	53.8859		43.0107	55.3832	64.9659		66.3363	44.9596	40.5521	39.5469	70.5003	50.1797
O75691	Small subunit processome component 20 homolog	UTP20	318.385	0.00109406	0.862372	97.1189	67.5868	73.0971	81.6045	78.4396	58.4117	55.1128	53.0173	59.6495	79.4023	142.617	59.3705
O75694	Nuclear pore complex protein Nup155	NUP155	155.199	1.26435e-05	0.972375	258.128	258.105	281.293	265.86	168.968	205.371	263.479	270.763	259.036	305.596	203.97	217.833
O75695	Protein XRP2	RP2	39.6411	8.01386e-05	0.942555	177.336	180.922	173.588	199.184	199.576	180.298	162.294	206.929	209.004	188.969	176.007	167.643
O75718	Cartilage-associated protein	CRTAP	46.5619	6.87274e-05	0.961699	138.05	156.123	127.887	100.754	125.547	183.52	98.3374	121.393	110.148	119.585	151.275	156.065
O75746	Calcium-binding mitochondrial carrier protein Aralar1	SLC25A12	74.7619	7.94491e-05	0.943511	143.832	180.815	155.629	152.9	133.445	149.28	138.826	148.882	109.767	122.758	114.449	127.181
O75751	Solute carrier family 22 member 3	SLC22A3	61.2802	0.000145719	0.923504	682.591	1000.01	730.09	630.895	481.013	648.523	609.8	374.605	320.37	283.716	392.809	282.923
O75781	Paralemmin-1	PALM	42.0759	6.72261e-05	0.962132	114.534	122.074	71.8336	135.849	116.803	157.123	124.11	108.767	97.4992	132.382	136.868	92.2019
O75787	Renin receptor	ATP6AP2	39.008	0.000174199	0.909378	239.139	187.522	218.196	197.369	198.591	206.256	223.782	166.584	233.27	241.676	148.81	164.214
O75792	Ribonuclease H2 subunit A	RNASEH2A	33.3949	0.00102805	0.864684	83.6635	119.129	193.74	30.9907	60.8261	110.146	107.648	73.9846			86.2373	104.734
O75794	Cell division cycle protein 123 homolog	CDC123	39.1348	0.00144075	0.828375	28.3116	14.0018	33.697	27.5881	43.0785	45.7295	36.6572		28.6959	32.4019	33.6735	32.296
O75815	Breast cancer anti-estrogen resistance protein 3	BCAR3	92.5655	0.0025882	0.804636		13.6347	35.55	16.6214				18.8592	30.6839	32.5996		23.6745
O75817	Ribonuclease P protein subunit p20	POP7	15.6509	0.00781799	0.780037	43.3337	48.324					36.0864	37.9223	44.7878	40.0268		47.1485
O75818	Ribonuclease P protein subunit p40	RPP40	41.834	0.00433589	0.794767	14.9081	19.3538		12.2279	14.9487	16.2184	5.53236	20.0861	20.3244	8.78115	20.6151	21.3821
O75821	Eukaryotic translation initiation factor 3 subunit G	EIF3G	35.611	7.14886e-05	0.950767	200.917	221.224	231.784	212.216	195.147	199.564	214.563	236.083	230.841	237.917	220.978	193.597
O75822	Eukaryotic translation initiation factor 3 subunit J	EIF3J	29.0624	0.000131527	0.927423	142.319	120.246	201.765	162.301	155.483	155.923	179.158	161.812	204.502	178.155	153.341	117.342
O75832	26S proteasome non-ATPase regulatory subunit 10	PSMD10	24.4278	7.94491e-05	0.943472	93.9489	105.256	120.849	105.2	109.334	116.064	110.149	115.008	93.5339	86.5236	97.5708	103.719
O75843	AP-1 complex subunit gamma-like 2	AP1G2	87.1166	0.000151628	0.921119	95.5222	78.457	90.6375	84.0545	108.538	78.5843	89.3304	102.226	135.008	104.554	55.3664	95.3571
O75844	CAAX prenyl protease 1 homolog	ZMPSTE24	54.8129	0.0001745	0.909282	249.94	242.996	239.835	211.335	236.785	191.178	197.517	232.028	254.872	260.67	162.78	193.447
O75864	Protein phosphatase 1 regulatory subunit 37	PPP1R37	74.7673	0.00567052	0.78854				27.4548	31.8929				60.7465			28.1479
O75874	Isocitrate dehydrogenase [NADP] cytoplasmic	IDH1	46.6593	7.20583e-05	0.949919	279.349	247.782	297.575	358.372	347.561	403.349	359.219	240.556	245.082	214.967	475.478	486.812
O75879	Glutamyl-tRNA(Gln) amidotransferase subunit B, mitochondrial	GATB	61.864	0.000544783	0.880438	150.897	147.076	159.328	203.774	188.919	142.922	172.959	169.365	160.213	97.307	160.273	157.404
O75880	Protein SCO1 homolog, mitochondrial	SCO1	33.814	9.18415e-05	0.936496	115.784	101.222	110.258	145.728	140.162	116.765	109.782	144.478	148.498	177.691	76.2153	116.199
O75881	Cytochrome P450 7B1	CYP7B1	58.2559	0.00384695	0.797181							145.094
O75882	Attractin	ATRN	158.537	8.33901e-05	0.940164	66.7204	88.0941	76.0729	59.5861	83.9562	71.7873	77.5322	85.6704	74.2626	66.0967	109.189	81.7722
O75884	Serine hydrolase RBBP9	RBBP9	20.9999	0.00165799	0.821494		39.9726	14.4796	69.3179	41.4616	42.9483	51.2295	36.925	35.7702	38.4603		40.9389
O75886	Signal transducing adapter molecule 2	STAM2	58.1642	0.00110708	0.861883	105.888	115.26		103.347	99.0296	94.7843	86.4358	86.286	83.8258	114.894	105.352	117.85
O75907	Diacylglycerol O-acyltransferase 1	DGAT1	55.2783	0.00133475	0.842307	69.4301	76.8841	82.751	75.5426	49.9571	56.0712	62.7062	65.3713	45.1198	66.2565	44.5901	45.2493
O75909	Cyclin-K	CCNK	64.2398	0.00117421	0.859198	37.014	12.3485		32.1794			25.8325	18.7589		27.0133	54.4548	19.5105
O75911	Short-chain dehydrogenase/reductase 3	DHRS3	33.5484	0.000139005	0.92556	130.42	186.411	113.291	128.789	78.5053	174.273	137.617	166.92	153.602	92.7514	67.865	151.962
O75914	Serine/threonine-protein kinase PAK 3	PAK3	62.3096	0.00721481	0.782351	45.9327	117.423		4.70163	179.122				37.448	28.4095	49.6178
O75915	PRA1 family protein 3	ARL6IP5	21.6147	7.94044e-05	0.943576	348.425	402.539	370.674	349.088	434.686	376.885	363.824	431.604	391.794	425.23	306.111	388.942
O75923	Dysferlin	DYSF	237.295	1.4977e-05	0.971763	308.186	316.395	278.207	290.077	273.462	292.413	215.915	355.784	377.667	376.936	243.668	257.454
O75925	E3 SUMO-protein ligase PIAS1	PIAS1	71.836	0.00151724	0.825572	71.7315	80.9171				58.4619		76.9137				88.1828
O75934	Pre-mRNA-splicing factor SPF27	BCAS2	26.1314	0.000182535	0.906509	100.395	118.18	125.282	111.161	103.643	109.645	117.185	118.339	114.094	128.786	111.407	99.8176
O75935	Dynactin subunit 3	DCTN3	21.1194	0.000112577	0.931415	101.055	122.579	118.929	104.547	138.293	105.705	111.114	146.399	87.8051	163.774	161.439	103.703
O75937	DnaJ homolog subfamily C member 8	DNAJC8	29.8417	7.89851e-05	0.943862	127.421	97.0588	84.8656	139.384	119.103	129.863	111.335	119.344	134.963	133.374	126.237	131.937
O75940	Survival of motor neuron-related-splicing factor 30	SMNDC1	26.7111	0.000193984	0.903115	312.487	228.698	159.775	300.097	189.262	226.69	260.604	226.896	223.107	288.834	180.831	274.887
O75943	Cell cycle checkpoint protein RAD17	RAD17	77.0548	0.0014202	0.829201	53.9539	19.709	24.0477	34.4268	30.8476	46.0517	28.9715		41.9327	37.6223	24.4146	39.8364
O75947	ATP synthase subunit d, mitochondrial	ATP5PD	18.4912	7.23262e-05	0.949605	804.688	878.994	892.764	818.644	814.716	780.775	823.802	802.88	786.465	879.486	551.239	693.931
O75954	Tetraspanin-9	TSPAN9	26.7789	0.000137453	0.925932	175.899	222.376	166.612	106.023	134.679	138.602	123.798	175.326	115.077	119.61	110.021	141.294
O75955	Flotillin-1	FLOT1	47.3553	7.07872e-05	0.955826	291.201	248.301	288.807	227.227	288.231	231.436	264.631	273.174	217.302	264.124	202.975	191.786
O75962	Triple functional domain protein	TRIO	346.9	0.000674956	0.876218	39.5095	34.9054	31.9689	27.6661	35.3894	36.9648	47.1661	34.4149	34.0708	36.8448	38.3355	34.3161
O75964	ATP synthase subunit g, mitochondrial	ATP5MG	11.4285	6.80559e-05	0.961921	1106.35	1232.9	1504.14	1365.48	1310.47	1280.62	1197.3	1380.42	1242.98	1375.7	863.728	1087.11
O75970	Multiple PDZ domain protein	MPDZ	221.618	0.000706891	0.875178	86.037	71.1638	66.9285	72.1002	70.0914	68.2002	50.128	64.9658	73.706	88.9318	46.4104	74.381
O75976	Carboxypeptidase D	CPD	152.931	0.000155839	0.918929	119.962	141.2	122.384	119.031	99.3818	95.0596	121.222	133.968	120.662	131.935	97.6612	118.505
O75995	SAM and SH3 domain-containing protein 3	SASH3	41.5955	0.00137062	0.832247		27.3912		17.9082								39.9434
O76003	Glutaredoxin-3	GLRX3	37.432	7.07872e-05	0.955238	163.805	145.588	182.02	228.821	222.959	211.775	184.291	149.31	186.389	163.733	216.19	237.844
O76011	Keratin, type I cuticular Ha4	KRT34	49.4236	0.000361978	0.887543	29.6317	44.1401	24.1805	24.2744	37.0227	42.5239	36.4704	45.4582	38.0519	82.5739	21.4375	23.0419
O76021	Ribosomal L1 domain-containing protein 1	RSL1D1	54.9725	7.07872e-05	0.956815	145.968	171.599	126.26	161.596	121.802	117.725	145.712	127.826	127.892	122.63	124.557	157.439
O76024	Wolframin	WFS1	100.291	7.84067e-05	0.944384	333.208	354.462	411.509	294.556	213.508	315.886	325.834	281.702	301.561	341.3	283.357	378.211
O76031	ATP-dependent Clp protease ATP-binding subunit clpX-like, mitochondrial	CLPX	69.2237	0.000131084	0.927492	95.1912	100.409	110.872	108.387	147.909	104.178	120.691	114.471	112.537	129.558	84.1747	108.024
O76038	Secretagogin	SCGN	32.0397	0.00140354	0.830059	79.051					131.899	29.6385		95.5108			58.8731
O76041	Nebulette	NEBL	116.453	7.88382e-05	0.944037	133.393	121.978	111.035	84.9234	46.2595	67.4048	165.392	109.346	109.089	120.094	91.8933	78.9037
O76062	Delta(14)-sterol reductase TM7SF2	TM7SF2	46.4059	0.000167527	0.911838		173.046	66.7054	123.15	158.341	73.2281	88.9236	93.4183	59.7091	94.9287		77.0443
O76070	Gamma-synuclein	SNCG	13.3308	8.79075e-05	0.937992	118.582	131.856	48.031	181.589	110.123	132.495	131.709	71.6376	84.3602	56.5863	117.641	243.127
O76071	Probable cytosolic iron-sulfur protein assembly protein CIAO1	CIAO1	37.84	0.000136998	0.926059	53.7174	50.8331	74.8351	72.6692	75.8359	74.8961	66.1541	58.8949	73.6816	59.3947	68.6123	74.3224
O76074	cGMP-specific 3',5'-cyclic phosphodiesterase	PDE5A	99.985	7.35348e-05	0.947947	57.8273	43.0564	22.1099	61.0095	46.5323	54.406	41.9568	41.3466	53.5242	38.788	46.2887	65.591
O76082	Solute carrier family 22 member 5	SLC22A5	62.7517	0.00133964	0.836916	130.86	174.628	63.8139	78.8835	92.0003	57.9786	91.2287	117.373	109.932	119.414		89.197
O76083	High affinity cGMP-specific 3',5'-cyclic phosphodiesterase 9A	PDE9A	68.4926	0.000134124	0.926783	509.256	360.683	623.725	464.309	860.742	492.385	476.258	380.446	488.906	466.55	538.077	262.903
O76094	Signal recognition particle subunit SRP72	SRP72	74.6062	7.07872e-05	0.952581	197.46	222.824	186.721	200.492	210.534	192.801	212.686	203.792	230.664	211.031	165.516	220.832
O94760	N(G),N(G)-dimethylarginine dimethylaminohydrolase 1	DDAH1	31.1218	0.000157177	0.917735	119.901	124.808	126.267	175.362	140.024	172.914	170.977	140.012	96.0512	130.889	146.052	191.222
O94762	ATP-dependent DNA helicase Q5	RECQL5	108.858	0.00769158	0.780508	45.1066	60.8093		24.0099					30.1578			31.3244
O94763	Unconventional prefoldin RPB5 interactor 1	URI1	59.8322	0.000859443	0.870305	75.6678	47.2288		104.338		66.993	64.5926	76.0368	73.6395	76.9028	72.5527	104.447
O94766	Galactosylgalactosylxylosylprotein 3-beta-glucuronosyltransferase 3	B3GAT3	37.1218	0.000162917	0.913918	153.831	168.666	173.145	139.105	162.161	161.182	130.679	166.628	186.757	179.569	116.427	124.816
O94776	Metastasis-associated protein MTA2	MTA2	75.0231	7.88662e-05	0.943942	281.551	231.008	186.84	245.816	188.173	183.879	236.292	227.803	233.078	274.93	221.243	245.445
O94788	Retinal dehydrogenase 2	ALDH1A2	56.7239	0.000112257	0.931485	68.1405	101.425			80.916		1268.99		48.5233		164.472	76.4235
O94804	Serine/threonine-protein kinase 10	STK10	112.135	0.000108848	0.932272	66.8942	61.6877	70.0696	83.7458	75.904	72.9377	73.0477	64.5552	71.4166	79.4979	96.0287	99.092
O94805	Actin-like protein 6B	ACTL6B	46.8775	0.00436713	0.794602		155.763		167.534		151.58		147.872	144.686	130.331		172.551
O94808	Glutamine--fructose-6-phosphate aminotransferase [isomerizing] 2	GFPT2	76.9306	0.00135153	0.834261	27.9786	15.6322		62.9148	14.914	53.7206	29.7465	43.8891	48.7519	38.1765
O94811	Tubulin polymerization-promoting protein	TPPP	23.6937	0.00919967	0.774972					64.947		71.3884			68.3623
O94817	Ubiquitin-like protein ATG12	ATG12	15.1133	0.00066405	0.876563	97.8759	106.176		57.2907	99.8826	58.6647		64.2779	61.5858	61.1584	125.483	93.4128
O94819	Kelch repeat and BTB domain-containing protein 11	KBTBD11	65.7198	0.00139292	0.830569	72.6683		26.0021	44.598		14.935	91.8941		59.5529			41.4995
O94822	E3 ubiquitin-protein ligase listerin	LTN1	200.552	0.000210291	0.899978	56.8028	54.4892	55.619	57.3182	61.4143	60.4051	64.332	57.1596	75.4399	62.7539	76.3731	77.5444
O94826	Mitochondrial import receptor subunit TOM70	TOMM70	67.4548	2.22584e-06	0.977013	143.722	165.177	134.449	129.425	156.511	127.344	168.333	135.145	110.317	138.022	124.456	133.514
O94829	Importin-13	IPO13	108.195	0.000874618	0.869834	42.6205	58.5105	50.7941	42.9611	41.3045	49.6376	57.2607	52.4991	48.4651	47.383	60.6024	51.8189
O94830	Phospholipase DDHD2	DDHD2	81.0318	0.00499718	0.791557	415.662	556.198	571.346	320.784	408.535	446.432	435.34	544.461	570.497	519.622	413.526	536
O94832	Unconventional myosin-Id	MYO1D	116.202	0.000127667	0.92825	139.223	121.951	101.732	119.585	117.496	112	105.322	131.812	130.188	137.096	119.25	94.1099
O94842	TOX high mobility group box family member 4	TOX4	66.1948	0.000670274	0.876369	96.5022	90.0252		77.8565			68.2262	41.7896	52.6878	55.5065	76.6864	68.3235
O94851	[F-actin]-monooxygenase MICAL2	MICAL2	126.689	0.00731598	0.781958							80.3145		49.1318		170.28
O94855	Protein transport protein Sec24D	SEC24D	113.01	7.56781e-05	0.946404	152.282	126.325	130.628	127.626	99.8249	139.147	125.223	101.666	126.079	114.122	122.198	156.798
O94856	Neurofascin	NFASC	150.027	0.000224668	0.897945	34.8488	55.677	44.6782	55.8786		61.761	97.7907	40.8244	34.7126	28.49	80.3605	55.9997
O94864	STAGA complex 65 subunit gamma	SUPT7L	46.1928	0.000523508	0.881146	41.2793	26.3596		40.3261		31.6272	22.9645	36.516	75.1104	69.7321	43.1526	23.8977
O94868	F-BAR and double SH3 domains protein 2	FCHSD2	84.2764	0.000183715	0.906177	36.4425	25.3958	29.0443	41.2742	39.4854	38.7224	22.2743	23.6893	26.4401	27.7319	36.8935	35.2331
O94874	E3 UFM1-protein ligase 1	UFL1	89.5953	7.07872e-05	0.959967	285.675	302.825	252.765	291.841	335.078	330.356	273.243	369.171	369.929	361.85	405.695	372.955
O94875	Sorbin and SH3 domain-containing protein 2	SORBS2	124.108	1.7963e-05	0.971134	237.874	348.853	95.7761	222.59	213.625	312.507	225.555	148.045	148.798	144.351	142.543	178.053
O94876	Transmembrane and coiled-coil domains protein 1	TMCC1	72.083	0.00127159	0.854148	23.317	14.3536		34.0763	43.3424	20.6319	19.2571	34.622	19.3248	49.7154		23.9375
O94880	PHD finger protein 14	PHF14	100.053	0.00201067	0.812552		51.3049	4.38661			53.0011	46.5443		25.8154	40.6968		35.7158
O94885	SAM and SH3 domain-containing protein 1	SASH1	136.653	0.000155651	0.919159	76.8173	58.8593	88.9249	87.0076	43.8483	52.7138	60.4824	60.327	60.3434	52.0621	93.1028	67.133
O94886	CSC1-like protein 1	TMEM63A	92.1262	0.000162942	0.913873	64.4964	193.777	187.27	147.622	147.15	154.208	186.492	184.363	212.054	228.516	144.709	173.259
O94887	FERM, ARHGEF and pleckstrin domain-containing protein 2	FARP2	119.888	0.000272678	0.893073	30.8782	26.0533	30.7568	27.9755	24.3128	25.7211	17.4924	39.7931	28.4758	21.8788	20.9189	27.0764
O94888	UBX domain-containing protein 7	UBXN7	54.8623	0.000153142	0.920466	113.546	119.18	92.7006	132.904	89.9756	100.94	118.636	101.734	97.4304	90.8124	120.055	123.835
O94901	SUN domain-containing protein 1	SUN1	87.1096	8.8309e-05	0.937753	69.8902	129.518	107.424	119.365	81.9888	94.9357	117.748	114.309	110.578	139.911	75.6164	86.3516
O94903	Pyridoxal phosphate homeostasis protein	PLPBP	30.3439	0.000158715	0.916299	179.882	177.485	162.85	298.331	262.893	252.164	273.112	127.319	206.785	170.525	197.39	306.317
O94905	Erlin-2	ERLIN2	37.8395	7.07872e-05	0.960723	345.511	345.736	414.231	338.196	349.888	298.712	389.872	411.335	368.865	353.829	271.213	264.13
O94906	Pre-mRNA-processing factor 6	PRPF6	106.925	0.000129534	0.92784	141.837	142.36	143.619	122.839	104.135	116.21	125.552	123.857	121.329	130.194	115.902	116.351
O94907	Dickkopf-related protein 1	DKK1	28.6715	0.000115653	0.930712	22.4151	42.7248									141.849	59.1208
O94911	ABC-type organic anion transporter ABCA8	ABCA8	183.677	0.0001098	0.931992	99.1697	41.4351	99.7764	70.3462	107.539	83.3426	173.76	79.6397	59.8739	45.0811		33.2172
O94915	Protein furry homolog-like	FRYL	339.598	0.000232411	0.896991	60.0503	51.6522	52.9459	67.2455	56.8901	61.5585	62.8621	59.4722	61.6813	61.0568	56.2858	56.0344
O94916	Nuclear factor of activated T-cells 5	NFAT5	165.763	0.000166052	0.912507	93.7307	47.6797	71.418	62.3591	54.4231	47.3953	69.1612	46.2927	56.1922	78.1152	63.6902	60.6386
O94919	Endonuclease domain-containing 1 protein	ENDOD1	55.0166	7.62874e-05	0.945981	287.658	263.783	262.433	219.45	300.362	270.37	256.812	227.78	287.616	247.643	217.259	190.489
O94923	D-glucuronyl C5-epimerase	GLCE	70.101	0.000953168	0.867235	99.7096	76.6788	100.445	75.2016	88.6042	92.615	60.5875	103.812	89.1255	79.1975	80.2917	79.5876
O94925	Glutaminase kidney isoform, mitochondrial	GLS	73.4611	0.000137182	0.926015	60.376	64.0397	65.7766	54.1971	68.0249	70.3326	68.0087	46.4872	50.3978	59.9977	49.5926	38.7502
O94929	Actin-binding LIM protein 3	ABLIM3	77.8016	9.45913e-05	0.935645	108.996	89.0153	40.2631	112.097	95.6187	52.9504	81.3413	77.5936	63.329	81.9216	48.7151	78.2798
O94953	Lysine-specific demethylase 4B	KDM4B	121.897	0.00075611	0.873594	33.3693	14.6117	19.3658	15.1627	10.3227	20.1591	23.1336	15.8	28.2913	26.7639	22.4361	30.536
O94955	Rho-related BTB domain-containing protein 3	RHOBTB3	69.4134	0.000679293	0.876075	54.864	58.255	55.5669	56.2175	54.0535	61.0661	61.0299	58.2112	71.5883	54.2638	47.1931	54.5442
O94956	Solute carrier organic anion transporter family member 2B1	SLCO2B1	76.7107	0.000329512	0.889258	52.8084	65.4008	57.5202	40.4692	55.1213	65.7114	56.9858	52.5743	43.1503	47.1292	50.2707	38.5397
O94964	Protein SOGA1	SOGA1	159.76	0.00984718	0.772738		26.8496
O94966	Ubiquitin carboxyl-terminal hydrolase 19	USP19	145.651	0.00124736	0.85577	49.1704	48.771	30.4448	65.1912	72.5992	78.5668	66.2127	51.1783	55.7857	54.3474	15.4845	39.6489
O94973	AP-2 complex subunit alpha-2	AP2A2	103.96	6.1914e-05	0.963593	293.015	333.735	257.288	315.93	292.729	302.496	303.309	324.2	297.2	331.803	294.338	276.046
O94979	Protein transport protein Sec31A	SEC31A	133.015	2.089e-05	0.970494	347.705	281.689	296.975	260.721	208.692	239.157	306.905	231.328	308.743	301.808	265.723	286.099
O94985	Calsyntenin-1	CLSTN1	109.793	0.000182917	0.906378	56.0697	52.6143			23.5487			35.7356	21.4328	66.001	70.2125
O94988	Protein FAM13A	FAM13A	116.932	8.43352e-05	0.939773	131.044	133.097	117.213	145.672	68.9156	145.847	177.743	183.174	219.33	190.061	104.453	137.237
O94989	Rho guanine nucleotide exchange factor 15	ARHGEF15	91.9401	0.00132127	0.848102	56.6698	34.7927	58.7492	66.8213	55.5736	36.5957	43.8978	47.8037	59.729	60.74	31.6496	49.572
O94992	Protein HEXIM1	HEXIM1	40.6234	0.00016546	0.912884	163.761	126.837	117.061	177.157	67.1417	117.068	129.903	127.405	186.455	182.179	140.827	177.155
O95050	Indolethylamine N-methyltransferase	INMT	28.891	0.000184073	0.906025		241.651		362.773					154.433		210.98	339.072
O95070	Protein YIF1A	YIF1A	32.0112	7.35348e-05	0.947958	276.574	279.332	323.84	244.38	282.366	190.118	243.013	260.982	310.276	268.07	253.819	214.179
O95071	E3 ubiquitin-protein ligase UBR5	UBR5	309.352	0.000564361	0.879779	56.5975	36.8046	31.9796	51.7344	30.7167	34.5462	41.5296	34.8134	39.3701	46.2303	42.8641	38.4216
O95081	Arf-GAP domain and FG repeat-containing protein 2	AGFG2	48.9631	0.00127501	0.853862	54.5931	49.0649	62.7994	28.3848		27.4987		46.2729	36.2112	46.5333	18.5814	30.7659
O95084	Serine protease 23	PRSS23	43.0012	0.00829878	0.778216
O95104	SR-related and CTD-associated factor 4	SCAF4	125.869	0.00013893	0.925579	133.976	117.81	97.2681	133.171	86.1416	93.5191	60.2857	75.2208	106.108	110.422	103.35	162.661
O95136	Sphingosine 1-phosphate receptor 2	S1PR2	38.867	0.000157841	0.917271	252.528	318.958	243.414	243.505	256.606	290.254	268.706	262.36	235.166	329.635	161.934	195.014
O95139	NADH dehydrogenase [ubiquinone] 1 beta subcomplex subunit 6	NDUFB6	15.4892	8.01609e-05	0.942399	239.871	285.124	352.695	244.36	304.847	227.308	231.059	282.765	202.048	203.461	171.474	272.654
O95140	Mitofusin-2	MFN2	86.4021	7.07872e-05	0.957517	116.606	125.695	115.971	128.487	106.92	135.895	127.505	128.748	122.747	129.192	92.0693	104.47
O95147	Dual specificity protein phosphatase 14	DUSP14	22.2549	0.00173254	0.819478							597.798			466.922
O95155	Ubiquitin conjugation factor E4 B	UBE4B	146.185	0.000803276	0.872101	55.03	58.3845	52.1911	63.6597	52.701	53.6679	54.3907	55.6117	55.3707	60.8591	76.9513	72.4889
O95159	Zinc finger protein-like 1	ZFPL1	34.114	0.000178829	0.90779	139.024	151.006	151.727	121.635	106.696	167.074	146.285	129.725	149.682	108.647	129.185	153.893
O95163	Elongator complex protein 1	ELP1	150.254	0.000305264	0.890788	50.846	44.5377	35.4853	53.6543	48.1803	55.1757	43.9372	46.1598	48.1766	41.8277	45.1361	38.7027
O95164	Ubiquitin-like protein 3	UBL3	13.157	0.00132127	0.848105	194.953	90.9704		180.418	48.8257	173.072	368.985		78.6316	111.891	205.887	242.623
O95166	Gamma-aminobutyric acid receptor-associated protein	GABARAP	13.918	0.00126094	0.854796	124.957	88.6745	273.703	95.2173	202.692		257.825	116.205	197.085	91.6731		146.391
O95167	NADH dehydrogenase [ubiquinone] 1 alpha subcomplex subunit 3	NDUFA3	9.27884	0.00114318	0.860472	566.036	596.936	590.439	551.401	746.962	520.102	517.288	620.976	411.027	510.689	393.14	529.19
O95168	NADH dehydrogenase [ubiquinone] 1 beta subcomplex subunit 4	NDUFB4	15.2086	7.52784e-05	0.946696	419.466	542.322	553.471	414.902	515.709	392.103	379.612	409.021	376.338	428.458	312.956	363.002
O95169	NADH dehydrogenase [ubiquinone] 1 beta subcomplex subunit 8, mitochondrial	NDUFB8	21.7657	0.00015836	0.916802	226.714	243.828	246.145	235.415	305.202	242.07	232.598	208.695	179.623	220.99	172.656	156.59
O95182	NADH dehydrogenase [ubiquinone] 1 alpha subcomplex subunit 7	NDUFA7	12.5514	0.000127957	0.92818	187.555	187.006	225.079	194.117	275.205	176.46	142.48	187.536	180.347	160.906	105.955	131.311
O95183	Vesicle-associated membrane protein 5	VAMP5	12.8048	0.00113579	0.860788	190.988	343.959	190.718	179.306	195.642	285.746	225.756	246.209	259.268	267.482	122.906	250.434
O95197	Reticulon-3	RTN3	112.611	0.000105838	0.932934	723.002	1606.16	890.784	527.711	793.823	589.483	503.232	703.737	657.981	530.749	688.563	681.561
O95199	RCC1 and BTB domain-containing protein 2	RCBTB2	60.3152	0.00178573	0.818121		45.6478	29.9075		50.3352	59.2449	79.759		49.4149			40.341
O95202	Mitochondrial proton/calcium exchanger protein	LETM1	83.3542	7.07872e-05	0.954941	79.7696	77.9204	93.4453	104.981	91.0132	84.6666	88.1015	96.3596	103.678	138.253	65.3912	72.2792
O95208	Epsin-2	EPN2	68.4816	7.9658e-05	0.94299	165.315	143.552	98.0124	130.176	96.8675	99.2159	143.816	121.849	146.93	117.83	134.166	126.131
O95210	Starch-binding domain-containing protein 1	STBD1	39.0073	0.000110781	0.931795	45.522	186.556	46.4502	155.98	208.733	110.119	242.13	124.557	177.572	178.578	98.5137	45.0456
O95218	Zinc finger Ran-binding domain-containing protein 2	ZRANB2	37.4044	0.000121435	0.92944	173.963	169.352	76.374	94.5504	79.0355	145.795	60.2742	135.484	107.673	91.164	159.458	131.986
O95219	Sorting nexin-4	SNX4	51.9088	0.000496576	0.88207	66.9206	78.0952	63.896	85.0981	71.2727	77.0288	70.2586	63.8515	65.0572	57.4747	80.9722	86.0716
O95232	Luc7-like protein 3	LUC7L3	51.4661	7.07872e-05	0.95716	157.567	146.029	122.538	156.415	110.166	124.447	126.65	127.151	132.003	158.741	126.117	140.406
O95236	Apolipoprotein L3	APOL3	44.2782	0.00171886	0.819842	24.5175	34.8739	88.2468	64.4291	63.4307	39.6183	76.9171	43.0863	49.1352	39.2024	40.3983	39.6788
O95248	Myotubularin-related protein 5	SBF1	208.443	8.48574e-05	0.939439	76.334	69.1811	73.828	79.7629	68.4089	74.2982	75.3433	82.2569	96.1833	80.107	59.9372	77.9361
O95249	Golgi SNAP receptor complex member 1	GOSR1	28.6126	7.99476e-05	0.942672	104.176	112.177	123.407	129.089	125.517	131.568	146.711	120.659	124.294	139.957	111.175	119.272
O95251	Histone acetyltransferase KAT7	KAT7	70.6424	0.00030545	0.890772	94.5385	88.4334	68.6503	87.5989	72.2898	69.3617	85.2178	95.8319	77.0251	78.4197	48.0373	62.6557
O95260	Arginyl-tRNA--protein transferase 1	ATE1	59.0902	0.00330121	0.800026	76.4964	69.7045	194.243	96.601		79.631		61.5975	47.8542	108.793		140.645
O95263	High affinity cAMP-specific and IBMX-insensitive 3',5'-cyclic phosphodiesterase 8B	PDE8B	98.9789	0.00311746	0.80107		9.66237		7.93088			15.4619					10.2996
O95271	Poly [ADP-ribose] polymerase tankyrase-1	TNKS	142.039	0.00127813	0.853595			39.2904			22.5375	19.9718	20.0737	45.2864	55.6099
O95274	Ly6/PLAUR domain-containing protein 3	LYPD3	35.9707	0.000304275	0.890858	33.9677	55.7239	12.0655			44.7082		16.9139	31.2644	41.5155	12.6735	29.0981
O95278	Laforin	EPM2A	37.1576	0.00389053	0.79696		5.41734				14.7642						4.62298
O95292	Vesicle-associated membrane protein-associated protein B/C	VAPB	27.2284	7.07872e-05	0.957425	571.083	629.389	532.859	598.905	536.071	563.093	618.594	589.229	573.071	587.152	518.062	563.184
O95295	SNARE-associated protein Snapin	SNAPIN	14.874	0.000167199	0.911973	100.449	93.253	144.271	100.626	113.723	81.508	122.442	87.6443	96.2665	124.094	124.168	68.0595
O95297	Myelin protein zero-like protein 1	MPZL1	29.0822	9.01376e-05	0.937089	152.014	129.232	100	106.657	85.5995	119.95	99.2413	109.867	90.2508	100.76	91.126	91.2444
O95298	NADH dehydrogenase [ubiquinone] 1 subunit C2	NDUFC2	14.1875	0.000350403	0.888154	135.024	107.619	118.23	110.318	121.815	113.865	108.24	95.3029	100.132	118.147	57.5009	89.6759
O95299	NADH dehydrogenase [ubiquinone] 1 alpha subcomplex subunit 10, mitochondrial	NDUFA10	40.7506	0.000104067	0.933317	161.851	178.285	193.066	170.232	195.837	165.311	151.469	169.507	158.717	153.45	122.534	142.669
O95302	Peptidyl-prolyl cis-trans isomerase FKBP9	FKBP9	63.0836	8.01609e-05	0.942386	176.017	184.461	193.865	212.134	225.927	210.277	172.519	210.594	161.699	158.089	209.126	204.207
O95336	6-phosphogluconolactonase	PGLS	27.5469	2.60643e-05	0.969546	655.503	492.811	781.426	995.904	788.198	831.204	1062.39	567.856	614.159	414.205	737.272	1174.96
O95340	Bifunctional 3'-phosphoadenosine 5'-phosphosulfate synthase 2	PAPSS2	69.5007	8.2914e-05	0.940587	104.65	129.835	77.42	161.886	135.632	160.342	150.757	120.436	81.9963	93.6508	193.785	179.215
O95347	Structural maintenance of chromosomes protein 2	SMC2	135.656	0.00132785	0.845218	49.0144	19.0384	39.0611	53.7584	56.5712	55.3066	30.5822	34.1984	35.0364	47.9906	41.0962	45.8536
O95352	Ubiquitin-like modifier-activating enzyme ATG7	ATG7	77.9596	0.000110312	0.931896	85.0484	81.2215	118.886	81.8203	94.3473	113.814	107.905	80.6992	75.8553	74.587	130.998	144.088
O95359	Transforming acidic coiled-coil-containing protein 2	TACC2	309.427	7.07872e-05	0.953159	126.928	117.819	94.411	114.148	81.0912	116.636	99.0372	95.9814	182.238	136.271	109.483	127.957
O95361	Tripartite motif-containing protein 16	TRIM16	63.9552	8.83489e-05	0.937724	59.6233	57.2557	50.3968	70.2495	77.9957	81.2234	52.0077	54.8447	66.6687	48.8451	73.3509	93.7735
O95363	Phenylalanine--tRNA ligase, mitochondrial	FARS2	52.3565	0.00135809	0.833395	120.991	108.905	129.581	137.193	136.584	83.419	131.055	94.9872	85.998	112.414		101.905
O95365	Zinc finger and BTB domain-containing protein 7A	ZBTB7A	61.4391	0.00247005	0.805676		25.696	70.1464				17.3042		18.2142			29.5767
O95372	Acyl-protein thioesterase 2	LYPLA2	24.737	0.000102241	0.933673	97.5901	87.7386	134.347	108.711	102.582	121.749	143.176	99.1718	112.636	61.5262	110.114	163.37
O95373	Importin-7	IPO7	119.517	7.07872e-05	0.956899	138.243	153.869	139.967	149.152	150.279	143.81	111.771	168.797	172.934	154.842	189.725	168.567
O95376	E3 ubiquitin-protein ligase ARIH2	ARIH2	57.8189	0.00163526	0.822108	29.7541	109.668	33.6999	36.677	40.019	40.2687	27.0093	22.8538	35.6451	24.279	46.6399	32.6467
O95379	Tumor necrosis factor alpha-induced protein 8	TNFAIP8	23.0034	6.44213e-05	0.963092	80.74	71.1556	110.246	99.4431	81.242	91.2466	100.695	66.308	79.9864	77.454	93.0393	85.3358
O95382	Mitogen-activated protein kinase kinase kinase 6	MAP3K6	142.596	0.00222591	0.808512	9.42966					24.3172	44.759
O95391	Pre-mRNA-splicing factor SLU7	SLU7	68.3867	0.0055578	0.789037	69.6945	43.3708		47.5266		65.9952	93.1957	37.3523	64.9624	65.463	29.2503	38.5199
O95394	Phosphoacetylglucosamine mutase	PGM3	59.852	8.19205e-05	0.941246	90.5343	100.525	113.336	102.695	104.132	143.528	107.608	73.3345	85.7879	59.308	138.845	192.39
O95396	Adenylyltransferase and sulfurtransferase MOCS3	MOCS3	49.6693	0.00133475	0.842635	17.8548	44.9813		62.5146	35.4771	43.7989	26.8954	34.6663	40.0921	29.4612	31.951	46.2165
O95400	CD2 antigen cytoplasmic tail-binding protein 2	CD2BP2	37.6465	0.000180621	0.907088	180.618	162.787	176.276	192.419	140.849	135.38	184.348	163.477	181.388	183.142	149.376	147.527
O95415	Brain protein I3	BRI3	13.645	0.0023844	0.806538	64.7421	86.0488				35.9208			38.6869			49.8252
O95425	Supervillin	SVIL	247.746	7.07872e-05	0.95725	135.029	113.617	71.987	120.349	120.828	119.266	91.3495	78.6285	113.299	96.4041	93.4353	87.6458
O95427	GPI ethanolamine phosphate transferase 1	PIGN	105.81	0.0002561	0.894477	75.0194	61.3914	60.8451	35.9464	57.606	60.7031	52.6638	67.6041	74.547	53.7103	36.2843	46.5815
O95428	Papilin	PAPLN	137.7	8.34121e-05	0.940139	80.248		2.2614		12.8473		33.8245				34.8846
O95433	Activator of 90 kDa heat shock protein ATPase homolog 1	AHSA1	38.2743	7.52784e-05	0.94702	142.765	149.927	158.21	178.114	163.37	152.261	159.426	159.683	160.97	148.862	143.673	186.127
O95445	Apolipoprotein M	APOM	21.2533	0.00163864	0.822011	273.463	226.955	520.347	210.066	263.721	277.446	289.247	244.783	275.648	124.528	88.1491	231.406
O95450	A disintegrin and metalloproteinase with thrombospondin motifs 2	ADAMTS2	134.755	0.00151011	0.825781		15.5449				41.3398			18.0302
O95453	Poly(A)-specific ribonuclease PARN	PARN	73.451	0.000174234	0.909348	50.6088	50.283	27.6603	64.5927	61.3223	50.2261	67.5639	36.914	69.0096	47.2234	68.5529	57.7366
O95456	Proteasome assembly chaperone 1	PSMG1	32.8539	0.000209067	0.900196	95.712	95.8748	99.4464	86.4115	103.332	136.776	100.514	113.596	100.439	92.9769	105.456	121.65
O95466	Formin-like protein 1	FMNL1	121.854	0.000160383	0.915335	49.2288	62.9431	56.3955	57.9519	58.5936	74.2639	69.3182	68.8857	77.1618	85.0334	50.3804	52.4879
O95470	Sphingosine-1-phosphate lyase 1	SGPL1	63.5238	0.000168938	0.911303	97.1529	99.2497	110.978	89.662	96.6562	96.0176	116.237	87.7781	92.018	100.245	67.0981	87.6879
O95471	Claudin-7	CLDN7	22.4185	0.000158226	0.91695	58.7928	61.015	82.8894	66.522	45.5902	68.3257		58.1023	60.5894	55.8388	67.489	30.8706
O95476	CTD nuclear envelope phosphatase 1	CTDNEP1	28.3771	0.000318722	0.889921	233.434	283.923	264.734	208.056	238.99	211.774	213.768	267.514	206.369	229.089	221.386	192.392
O95477	Phospholipid-transporting ATPase ABCA1	ABCA1	254.302	0.000628699	0.877696	80.1128	73.4342	72.4616	38.0656	102.883	68.5848	83.2141	76.1234	77.3222	66.7235	81.7132	58.8165
O95479	GDH/6PGL endoplasmic bifunctional protein	H6PD	88.8927	6.53297e-05	0.962955	165.222	213.121	148.736	104.257	176.184	175.085	180.439	217.42	186.017	211.727	185.457	194.894
O95486	Protein transport protein Sec24A	SEC24A	119.749	7.12716e-05	0.951123	147.565	125.336	143.034	123.877	92.2382	108.704	135.046	114.052	163.571	143.25	111.262	129.241
O95487	Protein transport protein Sec24B	SEC24B	137.418	1.4977e-05	0.971786	203.294	176.272	172.327	179.619	130.433	173.773	200.81	162.36	200.551	193.879	134.8	174.593
O95490	Adhesion G protein-coupled receptor L2	ADGRL2	163.349	0.000377885	0.886793	61.4114	41.5576	55.4607	69.0778	75.7989	60.0462	57.6499	61.3818	56.3221	51.3187	46.7013	69.7986
O95497	Pantetheinase	VNN1	57.0117	0.00137349	0.83197		19.6596		8.68679		8.53729		9.96188		8.67989
O95498	Vascular non-inflammatory molecule 2	VNN2	58.5031	0.000648046	0.877079	77.0441		71.2385	67.982	59.9368	52.0081	48.7119	30.7032	49.386	37.9446	54.8333	9.32966
O95503	Chromobox protein homolog 6	CBX6	43.8983	0.00129844	0.851731		33.5577		31.1476	15.7331	29.3523		16.6048	22.4127			19.0104
O95528	Solute carrier family 2, facilitated glucose transporter member 10	SLC2A10	56.9115	0.00133486	0.84137	23.9349	7.02388	13.424			13.8912	18.0741	9.97048		17.3656	26.182
O95544	NAD kinase	NADK	49.2282	0.0012719	0.8541	52.1002		84.3746	54.8015	49.9034	49.7325	62.321	75.7492	65.4571	52.0502	67.7989	52.0702
O95551	Tyrosyl-DNA phosphodiesterase 2	TDP2	40.9296	0.00135086	0.83436		26.6113		18.1108		36.8539	35.8696	29.0631	32.8879		49.9414	40.7241
O95563	Mitochondrial pyruvate carrier 2	MPC2	14.2789	0.000385394	0.886454	68.5346	65.7649	77.4249	52.0009	58.4765	59.7996	85.6051	65.0444	58.8723	61.7189	52.7847	39.9767
O95571	Persulfide dioxygenase ETHE1, mitochondrial	ETHE1	27.8729	0.000127515	0.928288	167.714	163.984	146.675	150.653	196.269	148.563	151.736	131.279	156.115	133.887	134.767	152.142
O95573	Fatty acid CoA ligase Acsl3	ACSL3	80.4201	7.84688e-08	0.983012	182.268	210.918	166.877	149.545	214.174	172.505	174.234	195.303	214.345	230.428	156.565	145.464
O95602	DNA-directed RNA polymerase I subunit RPA1	POLR1A	194.811	0.00145398	0.827751	26.7484	21.5473		28.1423	42.9411	33.9282	34.2643	34.5548	20.6099	25.8265	30.2145	32.8491
O95619	YEATS domain-containing protein 4	YEATS4	26.4995	0.00131029	0.850414	95.4873	81.8757	94.5284	103.108	58.109	69.5846	86.9529	84.1264	69.9569	68.7575	62.2555	75.5946
O95622	Adenylate cyclase type 5	ADCY5	138.908	0.00170802	0.820131	73.1435	96.5921	80.7396	46.1111	47.5756	67.4667		80.838	94.8878	57.6509	50.157	57.6999
O95628	CCR4-NOT transcription complex subunit 4	CNOT4	63.51	0.00137526	0.831822	152.169	138.669	170.774	194.038	159.511	159.256	142.421	157.427	179.349	189.281	151.751	161.018
O95630	STAM-binding protein	STAMBP	48.0769	0.000599477	0.878636	32.5835	37.17	38.9844	34.7605	40.2241	40.095	41.3046	31.4858	37.4039	29.8338	29.0042	31.1379
O95633	Follistatin-related protein 3	FSTL3	27.6635	7.94491e-05	0.943397	133.896	36.813	55.4202			39.8074	145.667	52.9126	56.2837	15.1082	271.858	115.023
O95639	Cleavage and polyadenylation specificity factor subunit 4	CPSF4	30.2548	0.000167431	0.911879	89.9569	116.027	76.6078	77.1599	65.8345	78.3116	84.3098	87.4755	73.9442	95.9889	66.6512	81.2522
O95671	Probable bifunctional dTTP/UTP pyrophosphatase/methyltransferase protein	ASMTL	68.8567	0.000148656	0.922256	57.2889	37.7318	72.3109	90.8287	59.6323	73.6599	72.6835	88.7662	84.8086	65.3915	95.5684	82.1704
O95674	Phosphatidate cytidylyltransferase 2	CDS2	51.418	4.88318e-05	0.966086	247.427	299.673	407.072	249.397	314.689	215.341	239.333	291.851	264.206	336.068	185.934	184.015
O95684	Centrosomal protein 43	CEP43	43.0649	0.0013211	0.848349	38.5332	19.4958		47.2358	31.6852	24.8694	26.4691	37.0437	33.5599		38.242	30.2381
O95685	Protein phosphatase 1 regulatory subunit 3D	PPP1R3D	32.5591	0.000637636	0.877398	25.6848	29.3472	25.4279	30.905	26.9161	31.218		28.8524	29.0639	20.8125	25.1373	30.3159
O95696	Bromodomain-containing protein 1	BRD1	119.52	0.00141533	0.829439	56.425	54.7924	71.0227	99.1487		45.4295	54.4398	46.7545		39.3082	43.7457	35.8294
O95707	Ribonuclease P protein subunit p29	POP4	25.4247	0.00114243	0.860525	84.3893	47.599	69.4464	77.9327	78.157	58.9506	80.2715	74.0801	79.583	90.5859	69.6495	78.4391
O95714	E3 ubiquitin-protein ligase HERC2	HERC2	527.228	0.00132778	0.845282	42.1176	46.7355	48.6385	39.9158	38.6421	33.0189	44.8155	43.8056	39.8005	42.8729	25.226	27.2755
O95716	Ras-related protein Rab-3D	RAB3D	24.2671	0.000376885	0.886843	93.8507	90.6453	77.515	98.1219	62.3193	74.1406	100.262	62.2609	76.6937	81.13	86.0782	79.5373
O95721	Synaptosomal-associated protein 29	SNAP29	28.9703	8.13411e-05	0.941697	87.7768	101.129	73.1551	107.461	99.7844	97.8558	89.7951	96.1573	95.8952	112.79	79.148	76.6886
O95747	Serine/threonine-protein kinase OSR1	OXSR1	58.0222	7.07872e-05	0.952694	254.325	213.548	245.875	262.013	290.275	227.943	269.961	240.595	237.067	238.769	273.726	215.671
O95749	Geranylgeranyl pyrophosphate synthase	GGPS1	34.8709	0.000249699	0.895074	94.1083	69.3973	103.456	106.5	95.4523	121.462	104.335	93.0372	103.875	97.3958	143.888	123.198
O95755	Ras-related protein Rab-36	RAB36	36.3224	0.00443543	0.794265	42.2505					2.40207		73.5536
O95757	Heat shock 70 kDa protein 4L	HSPA4L	94.5125	0.00128315	0.853082	82.4184	130.651	97.4769	129.301	138.05	94.6414	230.546	98.7491	103.915	123.955	105.356	99.0552
O95758	Polypyrimidine tract-binding protein 3	PTBP3	59.6895	0.000119063	0.929932	204.716	147.792	211.082	189.971	157.751	161.262	127.593	153.516	169.944	178.115	171.913	210.152
O95759	TBC1 domain family member 8	TBC1D8	130.835	0.00683869	0.783808											14.5654
O95760	Interleukin-33	IL33	30.7594	0.00146923	0.827184	100.041	28.3812		53.0743	101.087	111.867	51.4496		106.216	49.3423	54.333	85.0289
O95772	STARD3 N-terminal-like protein	STARD3NL	26.6546	0.00134281	0.836125	289.776	340.455	476.393	331.076	348.606	428.783	442.428	390.326	392.368	361.381		293.489
O95777	U6 snRNA-associated Sm-like protein LSm8	LSM8	10.4026	0.000656958	0.87679	193.961	161.269	199.599	172.369	207.087	170.843	215.126	228.751	221.084	124.025	210.703	138.585
O95782	AP-2 complex subunit alpha-1	AP2A1	107.546	7.07872e-05	0.95863	518.111	528.445	562.667	508.992	541.547	486.899	473.389	540.913	578.338	520.94	422.659	488.64
O95785	Protein Wiz	WIZ	178.674	0.0023682	0.806719	49.9283	8.69243	18.3404	40.753		25.5542	50.9246	26.4121	42.4242	45.2034	41.2244	49.3297
O95786	Antiviral innate immune response receptor RIG-I	DDX58	106.6	9.55705e-05	0.935351	88.8329	74.7352	122.293	100.452	89.1787	93.655	95.0525	98.1482	77.743	76.5374	139.815	113.939
O95793	Double-stranded RNA-binding protein Staufen homolog 1	STAU1	63.1823	7.52784e-05	0.946804	115.614	118.956	118.103	128.886	130.43	125.989	137.507	136.03	153.036	153.774	115.586	134.918
O95801	Tetratricopeptide repeat protein 4	TTC4	44.6785	0.000496877	0.882052	104.486	119.09	56.0472	106.181	106.891	105.403		90.479	105.266	100.882	110.304	114.978
O95810	Caveolae-associated protein 2	CAVIN2	47.1732	1.21538e-05	0.972498	423.308	331.043	357.526	322.434	335.465	333.956	316.149	338.948	256.638	264.086	222.633	226.834
O95816	BAG family molecular chaperone regulator 2	BAG2	23.7719	7.9658e-05	0.942886	118.546	146.837	103.79	112.757	95.7347	175.607	123.957	95.9664	97.7666	113.256	87.214	108.683
O95817	BAG family molecular chaperone regulator 3	BAG3	61.5947	6.19841e-05	0.963568	247.032	202.112	162.44	207.076	130.768	195.367	218.17	187.611	303.357	281.104	176.118	220.696
O95819	Mitogen-activated protein kinase kinase kinase kinase 4	MAP4K4	142.101	0.000100437	0.93408	85.9877	94.4514	59.9855	87.2448	84.9612	82.2295	67.6142	74.339	81.3232	92.8653	68.9566	95.2037
O95822	Malonyl-CoA decarboxylase, mitochondrial	MLYCD	55.0034	0.00014202	0.924736	106.049	123.635	106.091	119.248	112.957	121.778	115.253	98.9425	111.089	148.393	98.0292	107.202
O95825	Quinone oxidoreductase-like protein 1	CRYZL1	38.6965	0.000130884	0.927541	115.189	132.387	141.762	121.993	135.634	137.233	120.737	146.732	126.24	122.863	136.997	117.349
O95831	Apoptosis-inducing factor 1, mitochondrial	AIFM1	66.9006	7.07872e-05	0.957304	283.281	308.481	276.66	315.269	345.789	282.213	276.336	317.419	282.675	322.161	285.493	249.969
O95832	Claudin-1	CLDN1	22.7438	0.00149212	0.826386	109.785	40.2931	89.6202			46.1039	53.8082	108.765	127.149	95.3335		44.3099
O95833	Chloride intracellular channel protein 3	CLIC3	26.6485	7.23262e-05	0.949327	559.705	373.403	1589.51	369.09	572.685	503.409	584.671	520.479	655.03	362.613	228.288	469.982
O95834	Echinoderm microtubule-associated protein-like 2	EML2	70.6788	7.07872e-05	0.96057	184.81	233.539	250.277	258.331	265.088	242.606	218.288	189.882	211.455	137.216	243.96	232.359
O95837	Guanine nucleotide-binding protein subunit alpha-14	GNA14	41.5706	0.000112257	0.931497	179.615	114.919	160.696	240.954	157.809	180.785	187.76	183.617	160.063	115.416	128.811	103.899
O95858	Tetraspanin-15	TSPAN15	33.165	0.00123294	0.856586	144.983	185.207	98.8683	173.166	169.317	173.422	142.561	154.961	115.911	122.507	193.116	113.7
O95861	3'(2'),5'-bisphosphate nucleotidase 1	BPNT1	33.3923	8.14051e-05	0.941593	144.425	135.17	179.164	162.811	135.51	173.71	153.293	140.68	135.664	80.2805	133.218	212.479
O95864	Acyl-CoA 6-desaturase	FADS2	52.2594	0.000958322	0.867051									17.2043	16.908		29.7215
O95865	N(G),N(G)-dimethylarginine dimethylaminohydrolase 2	DDAH2	29.6439	7.23262e-05	0.949212	538.974	590.334	419.318	607.246	476.369	624.431	679.762	457.594	338.807	297.75	536.778	643.913
O95866	Megakaryocyte and platelet inhibitory receptor G6b	MPIG6B	26.1634	0.00114136	0.860577	120.761	26.08	41.38		70.0835	91.7924	83.117	70.3792	69.8074		60.8207	71.3854
O95867	Lymphocyte antigen 6 complex locus protein G6c	LY6G6C	13.8212	9.39816e-05	0.935844		72.5532				15.2183
O95870	Phosphatidylserine lipase ABHD16A	ABHD16A	63.2433	7.07872e-05	0.955685	118.055	136.097	119.552	103.651	127.595	137.824	102.817	124.804	116.343	104.208	87.2386	106.508
O95873	Uncharacterized protein C6orf47	C6orf47	31.7099	0.00107481	0.86306		86.8767	88.0147		43.3764	58.7841	57.0138	51.8502	61.4196	121.409		47.5815
O95881	Thioredoxin domain-containing protein 12	TXNDC12	19.2058	0.000177255	0.908303	175.446	152.24	290.421	208.096	246.132	230.247	189.505	142.813	253.51	189.617	135.381	259.841
O95900	Mitochondrial mRNA pseudouridine synthase TRUB2	TRUB2	36.6944	0.00801031	0.779304	30.0433		14.7409					19.722	30.9227	31.8743
O95926	Pre-mRNA-splicing factor SYF2	SYF2	28.7224	0.00133486	0.840281	59.7203	22.5487	45.8933	65.0291	36.4894	39.0735	47.4966	54.4286	37.4117	54.4028	50.7743	36.9412
O95967	EGF-containing fibulin-like extracellular matrix protein 2	EFEMP2	49.4055	1.91973e-05	0.970877	131.985	200.888	105.312	110.253	118.168	257.57	150.995	126.628	116.838	84.5707	138.805	171.224
O95980	Reversion-inducing cysteine-rich protein with Kazal motifs	RECK	106.457	0.000217138	0.89892	77.6294	91.1005	71.4805	71.1177	90.2721	89.2606	102.047	79.0486	72.8083	60.8797	72.5946	69.3673
O95983	Methyl-CpG-binding domain protein 3	MBD3	32.8441	0.00025266	0.894784	68.375	34.0892	52.043	51.6465	49.2891	33.8647	22.3726	43.0716	53.8563	44.1067	43.4537	42.4298
O95985	DNA topoisomerase 3-beta-1	TOP3B	96.662	0.00147937	0.826821	24.492	24.6838	6.11433	20.8446	23.1302	23.4677	22.9534	29.8997		36.8576	14.3389	19.2143
O95989	Diphosphoinositol polyphosphate phosphohydrolase 1	NUDT3	19.471	0.001326	0.846455	38.8522	13.1149	8.03699	39.1368	79.382	55.2498	57.871		44.7879		49.892	58.9707
O95990	Actin-associated protein FAM107A	FAM107A	17.4551	0.00201603	0.812417	22.5339	31.1563	16.7621	20.3909		35.6294		40.434				29.2471
O95994	Anterior gradient protein 2 homolog	AGR2	19.9792	0.00809397	0.779005		109.502			103.475				63.4137		34.0866
O95999	B-cell lymphoma/leukemia 10	BCL10	26.2516	0.0017268	0.819626												83.0939
O96000	NADH dehydrogenase [ubiquinone] 1 beta subcomplex subunit 10	NDUFB10	20.7767	0.000104543	0.933211	262.535	294.425	283.201	226.649	315.591	252.875	244.891	242.492	290.402	286.883	145.676	222.491
O96005	Cleft lip and palate transmembrane protein 1	CLPTM1	76.0967	9.91783e-05	0.934411	188.606	197.673	174.112	178.067	185.991	180.052	185.755	194.753	220.044	219.767	139.281	172.484
O96006	E3 SUMO-protein ligase ZBED1	ZBED1	78.1556	0.000333467	0.889043	132.208	66.1933	90.9736	109.18	45.3522	66.6107	113.557	83.4051	92.2589	119.975	111.934	87.3405
O96007	Molybdopterin synthase catalytic subunit	MOCS2	20.944	0.00796994	0.77946				78.8713	39.8355	57.3618			25.5186	29.6741
O96008	Mitochondrial import receptor subunit TOM40 homolog	TOMM40	37.8931	0.000324546	0.889572	151.153	160.723	153.229	132.768	178.838	136.378	130.477	156.388	136.913	172.771	133.078	111.479
O96011	Peroxisomal membrane protein 11B	PEX11B	28.4313	7.71161e-05	0.945249	133.089	133.857	132.485	91.4545	101.597	92.9418	82.4471	89.4359	89.8605	97.9195	67.9713	84.9277
O96013	Serine/threonine-protein kinase PAK 4	PAK4	64.0721	0.000300005	0.891151	97.1777	113.058	94.6715	108.148	104.218	94.6241	101.735	116.231	133.57	107.824	82.9621	127.138
O96019	Actin-like protein 6A	ACTL6A	47.461	7.81076e-05	0.944559	193.047	200.433	217.634	183.845	189.976	183.773	176.988	190.536	161.672	180.319	155.124	178.285
O96033	Molybdopterin synthase sulfur carrier subunit	MOCS2	9.75531	9.52175e-05	0.935494	122.745	84.5574	127.485	198.771	147.013	191.072	195.191	90.5536	104.432	75.2041	125.033	208.021
P00167	Cytochrome b5	CYB5A	15.3301	8.63703e-05	0.938692	1091.25	1356.44	756.461	891.625	913.961	781.275	838.053	1003.04	863.852	552.058	658.047	833.498
P00325	All-trans-retinol dehydrogenase [NAD(+)] ADH1B	ADH1B	39.8545	0.00020647	0.900658	130.133	94.6499	107.933	219.648	131.052	86.5772	124.228	96.4324	67.1626		98.575	81.0787
P00338	L-lactate dehydrogenase A chain	LDHA	36.6887	4.92291e-05	0.965983	484.563	364.571	564.593	574.36	508.728	526.612	736.993	440.927	443.606	364.03	776.427	632.107
P00352	Aldehyde dehydrogenase 1A1	ALDH1A1	54.8618	7.07872e-05	0.955146	134.627	176.735	165.591	141.778	172.605	160.333	541.801	104.753	85.2284	91.9304	330.161	203.15
P00367	Glutamate dehydrogenase 1, mitochondrial	GLUD1	61.3979	2.94058e-05	0.969014	342.438	361.043	330.135	342.523	352.767	324.712	317.348	360.911	298.017	315.783	352.989	311.253
P00387	NADH-cytochrome b5 reductase 3	CYB5R3	34.2349	5.97141e-05	0.964156	197.359	190.424	186.46	170.774	192.993	215.477	212.913	177.892	193.505	179.664	192.974	157.222
P00390	Glutathione reductase, mitochondrial	GSR	56.257	3.9531e-08	0.983947	187.088	171.448	143.83	189.634	184.035	159.422	146.372	178.695	141.212	139.871	291.297	233.57
P00403	Cytochrome c oxidase subunit 2	MT-CO2	25.565	0.000110291	0.931904	208.264	222.881	273.066	208.781	259.707	250.353	252.488	221.711	160.558	231.08	207.892	159.77
P00414	Cytochrome c oxidase subunit 3	MT-CO3	29.9508	0.00197017	0.813546	31.0896	18.0118	7.16706	10.0976	11.9572	15.5374	23.3059	17.1339	9.82446	17.4469		14.9075
P00441	Superoxide dismutase [Cu-Zn]	SOD1	15.9357	6.57131e-07	0.979497	1060.77	957.364	841.448	995.651	948.136	1002.42	1095.46	1005.69	1003.93	538.63	1007.82	1276.36
P00450	Ceruloplasmin	CP	122.205	6.95631e-05	0.961468	414.64	322.943	476.116	274.539	393.16	295.015	550.725	408.819	164.881	248.506	671.08	335.546
P00488	Coagulation factor XIII A chain	F13A1	83.2673	5.23485e-05	0.965514	948.884	745.322	551.93	919.1	926.605	982.129	807.724	795.085	573.006	689.487	997.132	874.943
P00491	Purine nucleoside phosphorylase	PNP	32.1179	7.07872e-05	0.956322	495.174	361.727	554.321	574.262	662.281	601.953	599.271	502.278	531.65	479.169	514.024	714.227
P00492	Hypoxanthine-guanine phosphoribosyltransferase	HPRT1	24.5794	9.04132e-05	0.936972	192.717	128.337	218.834	216.184	255.133	202.544	203.337	155.203	180.311	155.959	230.081	184.389
P00505	Aspartate aminotransferase, mitochondrial	GOT2	47.5177	7.95735e-05	0.943213	451.208	418.648	303.522	425.532	414.272	350.62	307.419	323.941	362.052	429.407	322.528	366.953
P00519	Tyrosine-protein kinase ABL1	ABL1	122.873	0.000997885	0.865686	20.6619	27.0627		31.5319	28.7457	25.7122	25.1318	14.6247	19.6222	18.7956	23.8161	23.769
P00533	Epidermal growth factor receptor	EGFR	134.277	5.37476e-05	0.965243	358.574	322.161	433.983	287.449	277.311	314.975	298.315	399.127	408.223	343.889	349.575	302.073
P00558	Phosphoglycerate kinase 1	PGK1	44.6147	2.35224e-05	0.970022	390.157	286.008	410.112	502.055	438.085	435.714	586.858	330.09	345.029	248.918	468.191	562.402
P00568	Adenylate kinase isoenzyme 1	AK1	21.6348	7.07872e-05	0.952063	565.703	379.226	505.455	598.636	648.041	563.678	584.569	372.081	362.041	346.98	588.066	454.04
P00734	Prothrombin	F2	70.0369	4.88318e-05	0.966084	285.999	759.278	189.06	154.411	209.235	188.908	269.569	184.609	186.38	90.7497	360.976	231.204
P00736	Complement C1r subcomponent	C1R	80.1185	7.14886e-05	0.950777	114.548	111.019	118.233	85.0203	124.116	113.386	139.57	154.726	98.8764	104.747	211.415	82.6066
P00738	Haptoglobin	HP	45.2053	3.88709e-05	0.967521	264.972	255.443	140.018	641.959	198.183	454.833	133.785	821.06	274.072	337.419	715.61	387.232
P00739	Haptoglobin-related protein	HPR	39.0296	7.07872e-05	0.951606	36.3714	79.2939	58.9959	144.17	76.0343	47.0618	56.6753	140.677	39.951	39.5411	189.865	68.3583
P00740	Coagulation factor IX	F9	51.7784	6.85962e-05	0.96177	466.889	579.531	219.593	241.598	201.822	332.824	275.035	271.266	126.372	51.294	323.894	374.746
P00742	Coagulation factor X	F10	54.7317	8.43605e-05	0.93974	214.092	850.241	130.776	129.786	182.328	136.31	283.289	122.147	174.283	71.1108	298.805	225.955
P00746	Complement factor D	CFD	27.0329	0.000111202	0.931699	74.2227	68.6015	131.115	70.6665	84.8974	104.065	145.263	64.7951	91.3806	60.6804	100.487	52.3639
P00747	Plasminogen	PLG	90.569	2.12143e-05	0.970423	686.694	701.633	426.732	289.743	336.413	453.103	397.749	510.82	234.905	221.322	790.929	502.455
P00748	Coagulation factor XII	F12	67.7921	8.24204e-05	0.940941	129.534	108.961	65.5139	83.3255	142.912	169.789	138.617	140.986	74.3554	82.9287	165.322	184.443
P00749	Urokinase-type plasminogen activator	PLAU	48.5074	0.00146041	0.827497	73.4966	58.8953		200.609	110.317		94.5643		53.3488	53.3042		38.7877
P00751	Complement factor B	CFB	85.5329	5.46902e-05	0.96504	466.443	334.469	302.225	369.717	299.322	403.502	453.443	330.087	185.377	204.294	683.314	382.766
P00813	Adenosine deaminase	ADA	40.7644	0.000159018	0.916019	175.578	96.2755	109.939	102.426	100.652	105.447	123.057	89.0152	91.0138	95.8763	135.257	78.8245
P00846	ATP synthase subunit a	MT-ATP6	24.8172	0.00132324	0.847631					668.008		1665.74			1495.49		570.969
P00915	Carbonic anhydrase 1	CA1	28.8702	7.07872e-05	0.954246	550.682	1343.33	1510.1	691.342	981.917	401.324	1732.21	840.081	587.921	668.607	1127.01	363.83
P00918	Carbonic anhydrase 2	CA2	29.2461	7.07872e-05	0.95748	246.783	281.433	362.389	258.91	276.116	152.409	516.916	222.349	194.034	181.663	350.674	191.648
P00966	Argininosuccinate synthase	ASS1	46.5304	7.72531e-05	0.945118	163.299	157.717	168.413	229.754	247.611	215.593	232.354	200.096	203.627	166.364	314.284	275.997
P00973	2'-5'-oligoadenylate synthase 1	OAS1	46.0286	0.000938603	0.86772		119.078	59.0723			121.22	203.659	136.252	92.3336	116.104	107.425
P01008	Antithrombin-III	SERPINC1	52.6024	6.57961e-05	0.962709	272.316	281.217	179.716	182.939	215.062	219.985	271.294	282.108	149.848	114.977	444.016	314.236
P01009	Alpha-1-antitrypsin	SERPINA1	46.7366	7.07872e-05	0.957601	1567.55	1578.76	1985.32	1300.63	1786.43	1645.73	2568.3	1280.57	1136.48	1187.07	2618.89	1840.38
P01011	Alpha-1-antichymotrypsin	SERPINA3	47.6509	7.07872e-05	0.953167	465.813	260.514	418.693	338.936	281.232	560.716	405.115	337.57	241.415	342.35	409.072	323.129
P01019	Angiotensinogen	AGT	53.1542	4.4845e-05	0.96667	1557.48	1230.2	829.965	1101.29	1153.38	1027.59	1492.55	980.468	758.443	724.352	2539.15	1798.95
P01023	Alpha-2-macroglobulin	A2M	163.291	2.7903e-07	0.980943	1123.01	891.008	1054.81	844.017	1408.31	885.593	1109.19	1296.84	970.211	1097.58	1749.65	598.932
P01024	Complement C3	C3	187.148	5.80655e-06	0.974615	614.138	483.749	573.94	461.867	515.133	510.31	588.748	592.811	364.825	352.597	999.456	570.237
P01031	Complement C5	C5	188.305	7.07872e-05	0.952161	193.225	152.836	171.653	131.348	164.08	139.852	161.372	151.843	100.172	91.1022	309.018	145.905
P01033	Metalloproteinase inhibitor 1	TIMP1	23.1709	7.07872e-05	0.958102	59.6899	135.106	92.0683	33.5979	54.0728	85.2518	72.4192	68.407	62.8587	30.7178	85.3911	80.0082
P01034	Cystatin-C	CST3	15.7992	0.000113091	0.931304	78.6964	99.8113	115.689	89.9719	79.1007	102.698	175.438	102.966	102.699	114.906	103.279	94.9342
P01040	Cystatin-A	CSTA	11.0065	0.00138618	0.830954	122.857		108.504	238.37	138.994	120.867	138.512	132.304	90.9845	70.8588	198.596	165.505
P01042	Kininogen-1	KNG1	71.9574	7.99476e-05	0.94268	334.988	592.289	196.508	258.062	286.105	295.797	400.887	338.66	203.587	160.076	682.341	390.131
P01111	GTPase NRas	NRAS	21.2292	0.000220353	0.898489	185.034	175.827	147.86	184.21	201.809	178.328	166.471	190.048	155.872	214.885	173.796	184.191
P01112	GTPase HRas	HRAS	21.2981	0.000735366	0.874251	201.95	208.763	227.92	230.037	295.455	225.72	176.598	201.834	194.8	215.605	219.325	153.827
P01116	GTPase KRas	KRAS	21.6558	0.0001492	0.922096	196.064	189.798	112.019	178.575	221.684	234.105	180.598	198.917	185.19	220.777	162.291	164.885
P01137	Transforming growth factor beta-1 proprotein	TGFB1	44.3411	0.000640256	0.877316	99.9882	77.995	97.1964	67.2348	118.604	80.5071	88.9588	67.3388	74.2724	102.445	73.7129	58.1481
P01210	Proenkephalin-A	PENK	30.787	0.000573887	0.87947		39.1293					13.5315
P01236	Prolactin	PRL	25.8758	0.000192216	0.903498								54.739
P01242	Growth hormone variant	GH2	24.9996	0.00102412	0.864828	194.77	105.657	303.318	175.015	252.201		209.714		286.089	131.869		123.545
P01344	Insulin-like growth factor II	IGF2	20.1403	0.000142016	0.924782	120.456	203.997	124.399	73.3352	67.7829	105.71	29.4348	81.53	49.7063	34.0222	183.015	117.627
P01591	Immunoglobulin J chain	JCHAIN	18.0986	0.0013305	0.844058	121.099	314.362	304.696		196.218							246.415
P01593	Immunoglobulin kappa variable 1D-33	IGKV1D-33	12.8485	0.000198305	0.902171	40.6567		283.501						27.6113		108.641
P01599	Immunoglobulin kappa variable 1-17	IGKV1-17	12.7785	9.63634e-05	0.935135	157.806	373.675	375.924	229.912	209.719	156.805	483.614	452.897	185.86	54.2347	97.0851	135.91
P01601	Immunoglobulin kappa variable 1D-16	IGKV1D-16	12.7304	0.0001593	0.915877	27.2175	128.008	100.446	30.5433	34.7562	29.0311		40.2524			65.5588
P01619	Immunoglobulin kappa variable 3-20	IGKV3-20	12.5571	5.99207e-05	0.964058	816.801	775.126	1580.56	691.566	1421.52	819.257	1275.4	828.554	838.928	486.621	849.527	740.073
P01700	Immunoglobulin lambda variable 1-47	IGLV1-47	12.2836	7.07872e-05	0.95891	4318.17	3316.44	5910.02	2643.12	1235.98	2258	4023.3	3489.7	837.5	1256.07	4006.21	2439.65
P01701	Immunoglobulin lambda variable 1-51	IGLV1-51	12.2487	0.00135023	0.834437	57.2287	32.1112	112.208	82.5376	102.139		174.96	55.2397	120.875	64.0134	57.0304
P01714	Immunoglobulin lambda variable 3-19	IGLV3-19	12.0424	7.07872e-05	0.960268	186.827	173.152	317.95	103.442	247.243	161.124	219.544	179.851	105.95	66.1114	197.53	98.0835
P01717	Immunoglobulin lambda variable 3-25	IGLV3-25	12.0114	7.19198e-05	0.950023	196.765	168.536	200.995	130.256	243.044	146.14	208.741	138.004	144.26	121.341	194.949	130.047
P01718	Immunoglobulin lambda variable 3-27	IGLV3-27	12.1648	0.00134553	0.835244	100.566					48.4968					166.637
P01721	Immunoglobulin lambda variable 6-57	IGLV6-57	12.5657	9.00469e-05	0.937139	123.358	40.095	119.022	76.5301	66.9041	46.9723	67.5236	96.8066	76.9298	69.6952	39.6993	44.0773
P01730	T-cell surface glycoprotein CD4	CD4	51.1105	0.00528053	0.790251							243.862
P01742	Immunoglobulin heavy variable 1-69	IGHV1-69	12.6594	0.00133486	0.841104	383.786	329.098	703.732	331.019	356.894		332.961	233.931	199.818	220.247	303.689	182.089
P01764	Immunoglobulin heavy variable 3-23	IGHV3-23	12.5823	0.000119008	0.929949	1369.32	1218.45	3518.1	1229.2	1338.56	887.257	2267.71	1733.04	1287.15	659.837	1285.96	695.413
P01766	Immunoglobulin heavy variable 3-13	IGHV3-13	12.5062	0.000134277	0.926749	598.14	436.818	427.258	230.88	676.487	231.499	194.227	433.981	351.19	136.26	414.986	515.325
P01780	Immunoglobulin heavy variable 3-7	IGHV3-7	12.9427	7.07498e-05	0.961064	244.826	314.435	440.448	240.837	366.119	241.733	499.213	311.641	205.147	236.349	304.801	231.825
P01782	Immunoglobulin heavy variable 3-9	IGHV3-9	12.9447	0.000225601	0.897835	405.287	583.951	593.719	256.894	536.793	225.769	386.114	329.829	169.23	119.583	172.379	108.634
P01833	Polymeric immunoglobulin receptor	PIGR	83.2836	0.000716032	0.874874		47.2192	10.3462		54.2899	31.3725	56.3166				44.7341	19.8531
P01834	Immunoglobulin kappa constant	IGKC	11.765	0.000183992	0.906051	878.323	959.547	1209.52	796.08	952.368	507.704	991.255	859.689	494.41	262.862	1121.24	785.479
P01859	Immunoglobulin heavy constant gamma 2	IGHG2	35.9006	0.000100437	0.934039	454.757	1081.2	1575.53	911.226	962.586	701.841	2100.73	1084.93	868.935	527.168	1353.41	937.448
P01860	Immunoglobulin heavy constant gamma 3	IGHG3	41.2869	0.000116463	0.930529	669.454	307.149	1190.12	314.522	455.425	822.387	435.873	272.106	581.375	95.3499	1539.06	484.866
P01861	Immunoglobulin heavy constant gamma 4	IGHG4	35.9406	0.000158551	0.916617	566.728	2920.3	904.503	516.114	453.274	235.309	404.818	265.304	599.195	260.976	460.534	614.274
P01871	Immunoglobulin heavy constant mu	IGHM	49.4397	7.07872e-05	0.955388	304.331	362.561	554.43	212.945	628.031	179.479	579.404	476.627	199.995	213.195	330.268	298.425
P01876	Immunoglobulin heavy constant alpha 1	IGHA1	37.6546	8.46176e-05	0.939642	287.025	932.629	863.206	196.456	460.153	395.815	384.439	373.575	234.875	111.324	867.825	412.287
P01880	Immunoglobulin heavy constant delta	IGHD	42.3528	0.000561021	0.879893	192.507		166.999				104.369				447.125	117.014
P01889	HLA class I histocompatibility antigen, B alpha chain	HLA-B	40.4601	8.24877e-05	0.940841	223.321	203.836	426.557	133.193	218.316	142.548	289.525	167.552	200.404	200.738	126.812	106.924
P01893	Putative HLA class I histocompatibility antigen, alpha chain H	HLA-H	40.8919	0.000114362	0.931022	70.1251	23.981	119.819	33.7043	21.7586	33.5628	29.1439	53.768	12.6829	36.5178	54.4637	62.2541
P01903	HLA class II histocompatibility antigen, DR alpha chain	HLA-DRA	28.621	0.000102241	0.933672	135.577	154.878	833.873	117.668	126.316	134.839	334.967	99.0846	190.353	58.8694	198.964	132.749
P01911	HLA class II histocompatibility antigen, DRB1 beta chain	HLA-DRB1	29.9661	8.12863e-05	0.941742	116.297	110.927	351.591	71.2505	124.22	72.9967	392.478	82.3793	177.531	86.0618	109.878	116.248
P01920	HLA class II histocompatibility antigen, DQ beta 1 chain	HLA-DQB1	29.9912	0.00133486	0.840142			291.457
P02008	Hemoglobin subunit zeta	HBZ	15.637	7.14886e-05	0.950829	1711.14	2194.7	1130.77	3926.41	864.508	1271.54	1381.54	3359.47	4418.05	8212.57	10178.5	335.655
P02042	Hemoglobin subunit delta	HBD	16.0555	7.44476e-05	0.947419	1475.26	1389.51	1940.23	620.292	641.612	490.309	1609.41	865.524	539.613	326.891	1042.94	551.421
P02100	Hemoglobin subunit epsilon	HBE1	16.2028	7.88382e-05	0.944075	247.163	208.112	311.246	541.797	566.542	234.227	448.749	466.2	353.365	465.103	697.678	87.1848
P02452	Collagen alpha-1(I) chain	COL1A1	138.941	7.07872e-05	0.957607	157.829	229.078	116.663	83.5571	88.6662	273.533	115.079	59.6536	67.7691	106.592	162.769	167.225
P02461	Collagen alpha-1(III) chain	COL3A1	138.564	0.000128612	0.928039	120.804	181.594	61.5083	94.4143	143.84	243.778	81.9439	81.6894	85.9189	112.048	142.073	197.96
P02462	Collagen alpha-1(IV) chain	COL4A1	160.611	7.07872e-05	0.960202	482.281	644.375	549.881	378.738	404.669	532.502	253.634	391.956	309.005	371.421	600.503	406.438
P02511	Alpha-crystallin B chain	CRYAB	20.1589	1.20046e-05	0.972572	1658.39	2775.41	2086.04	1983.32	2407.83	2334.78	2485.1	2644.96	2535.32	2778.75	2056.39	1323.97
P02533	Keratin, type I cytoskeletal 14	KRT14	51.5615	7.07872e-05	0.958897	457.899	284.033	495.296	263.845	567.828	280.672	338.842	339.761	384.038	449.306	527.46	341.723
P02538	Keratin, type II cytoskeletal 6A	KRT6A	60.045	0.000133287	0.926982	1446.85	139.614	365.445	158.115	803.638	85.0377	173.605	156.503	139.692	64.8621	206.029	137.445
P02545	Prelamin-A/C	LMNA	74.1395	6.63977e-05	0.962571	2286.46	2470.45	2584.82	2355.81	1263.12	1873.62	3003.6	2541.57	2330.52	2938.1	1954.23	1708.76
P02549	Spectrin alpha chain, erythrocytic 1	SPTA1	280.014	2.63892e-06	0.976589	422.804	217.415	339.139	200.767	414.681	200.492	282.692	281.994	254.584	414.874	233.662	69.3017
P02647	Apolipoprotein A-I	APOA1	30.7778	7.07872e-05	0.958063	1757.56	2091.02	1483.89	1424.2	1855.94	1709.16	2529.66	1550.35	1469.59	978.471	2576.83	1901.66
P02649	Apolipoprotein E	APOE	36.1541	5.66371e-05	0.964764	545.684	707.528	629.529	404.083	698.06	697.763	557.788	482.027	718.99	260.231	648.57	429.179
P02652	Apolipoprotein A-II	APOA2	11.175	8.14974e-05	0.941533	9082.18	9193.24	7331.06	8730.54	10549.3	8570.55	12890.6	9006.25	7760.04	5540.33	12216.1	10579.9
P02654	Apolipoprotein C-I	APOC1	9.33192	7.07872e-05	0.953063	3072.21	3182.08	3045.84	1518.8	2100.64	1841.26	3649.71	2388.01	2007.93	1160.01	2257.23	1424.91
P02655	Apolipoprotein C-II	APOC2	11.2839	9.13344e-05	0.936663	705.038	537.254	932.594	341.222	442.309	451.426	928.841	519.072	421.913	257.924	527.093	317.244
P02656	Apolipoprotein C-III	APOC3	10.8523	9.95271e-05	0.934317	7000.92	6139.34	5768.47	4111.75	3304.67	3517.72	8125.57	5501.15	4400.41	2067.38	4210.79	2718.39
P02671	Fibrinogen alpha chain	FGA	94.973	7.07498e-05	0.961101	743.024	506.51	590.659	457.497	509.813	270.355	502.117	245.992	301.784	389.198	1080.9	453.732
P02675	Fibrinogen beta chain	FGB	55.9282	6.69524e-05	0.962378	834	789.673	740.621	383.534	622.85	214.803	363.821	262.971	271.343	353.022	1570.29	397.473
P02679	Fibrinogen gamma chain	FGG	51.5117	6.42256e-05	0.963131	807.644	746.049	754.209	405.131	591.926	201.858	451.568	243.187	256.144	343.812	1469.39	390.791
P02724	Glycophorin-A	GYPA	16.3315	0.00127641	0.853755	77.4552					77.2608		115.195	90.2887	92.9612
P02730	Band 3 anion transport protein	SLC4A1	101.792	7.07872e-05	0.959725	1250.87	631.471	930.664	625.45	1274.33	601.416	1039.5	854.812	761.535	1200.05	736.791	211.328
P02741	C-reactive protein	CRP	25.0386	0.000103147	0.9335	318.223	113.467	362.507		63.204	116.361	561.244	169.046	172.212	282.84	338.468	107.584
P02743	Serum amyloid P-component	APCS	25.3871	7.75703e-05	0.944862	469.654	283.069	445.294	236.025	491.091	331.69	631.864	394.934	244.965	164.727	661.01	412.665
P02745	Complement C1q subcomponent subunit A	C1QA	26.0166	0.000156223	0.918543	600.494	542.417	1033.95	318.831	401.41	520.936	467.095	408.708	268.65	274.67	583.778	212.552
P02746	Complement C1q subcomponent subunit B	C1QB	26.7218	7.52784e-05	0.947049	389.346	342.139	819.245	215.843	282.14	380.355	356.064	262.754	165.202	200.24	421.437	177.966
P02747	Complement C1q subcomponent subunit C	C1QC	25.7736	6.18359e-05	0.963622	2228.32	1976.77	4341.43	1266.49	1741.15	1974.27	1892.25	1616.33	1096.71	1081.65	2627.45	1219.17
P02748	Complement component C9	C9	63.1734	7.07872e-05	0.957267	301.434	274.613	161.265	176.131	199.852	247.19	339.867	188.356	92.4644	75.937	460.066	231.814
P02749	Beta-2-glycoprotein 1	APOH	38.2981	7.07872e-05	0.957315	629.687	529.798	533.679	258.46	276.721	497.321	271.403	647.283	187.723	279.133	533.836	348.073
P02750	Leucine-rich alpha-2-glycoprotein	LRG1	38.1779	7.07872e-05	0.958616	215.895	161.458	155.444	133.178	187.384	152.387	344.325	180.023	102.61	132.124	277.106	171.123
P02751	Fibronectin	FN1	272.32	3.35225e-06	0.975988	1767.59	900.177	925.99	734.872	628.043	182.594	721.975	527.78	291.571	168.647	4197.49	1379.03
P02753	Retinol-binding protein 4	RBP4	23.01	8.21006e-05	0.941123	263.807	246.51	153.213	154.215	183.865	177.7	226.885	225.171	141.207	90.4462	275.108	218.163
P02760	Protein AMBP	AMBP	38.9995	3.47395e-06	0.975898	274.379	259.613	175.992	133.904	195.536	235.034	166.698	209.658	145.225	92.4884	341.837	267.67
P02763	Alpha-1-acid glycoprotein 1	ORM1	23.5116	7.07872e-05	0.95583	597.141	461.804	611.185	341.618	475.696	552.881	887.546	738.748	306.164	584.209	992.183	469.549
P02765	Alpha-2-HS-glycoprotein	AHSG	39.3407	1.22189e-07	0.982252	472.979	1805.76	510.454	434.776	436.459	513.011	821.658	475.356	625.674	534.422	1151.45	547.558
P02766	Transthyretin	TTR	15.887	7.23262e-05	0.9497	121.986	130.197	45.2087	84.4271	122.616	70.5087	78.4893	75.15	52.6838	54.9311	209.922	81.8333
P02768	Albumin	ALB	69.3667	7.07498e-05	0.961034	3068.43	3223.61	3716.94	2294.89	2996.34	3553.78	3338.01	3387.94	2587.95	2037.25	5062.83	3868.31
P02771	Alpha-fetoprotein	AFP	68.6776	7.07872e-05	0.957379	76.4933	107.728	76.9633	96.2426	218.63	204.253	104.198	86.6834	372.334	179.641	176.351	262.156
P02774	Vitamin D-binding protein	GC	52.9175	5.66371e-05	0.964766	529.398	485.491	309.222	444.914	407.246	506.882	715.446	415.929	294.698	254.912	753.793	542.357
P02775	Platelet basic protein	PPBP	13.8942	4.58909e-05	0.96651	624.393	435.086	378.045	390.999	569.715	542.734	517.794	455.985	430.992	408.23	653.399	463.357
P02776	Platelet factor 4	PF4	10.8449	0.000169574	0.911084	650.887	581.016	520.354	276.351	398.051	708.806	596.345	667.388	483.076	470.021	716.529	495.907
P02786	Transferrin receptor protein 1	TFRC	84.8714	6.69524e-05	0.96241	1550	942.014	1520.47	809.922	1559.89	1141.11	802.205	1388.47	1327.32	1127.94	1144.21	1319.92
P02787	Serotransferrin	TF	77.0639	1.33356e-11	0.992831	2051.26	1853.87	2026.59	1321.57	1605.27	1741.37	1902.3	2093.55	1242.25	1320.23	2995.32	1987.92
P02788	Lactotransferrin	LTF	78.182	6.95631e-05	0.961387	403.66	174.192	422.952	133.089	153.707	243.087	420.704	222.613	122.69	112.224	255.443	102.186
P02790	Hemopexin	HPX	51.6764	7.07872e-05	0.957887	1050.38	1190.55	563.44	716.133	775.151	963.691	1128.91	1212.57	525.518	442.093	1993.77	1325.92
P02792	Ferritin light chain	FTL	20.0197	9.33899e-05	0.936075	103.916	258.163	85.1224	317.548	331.375	148.613	446.426	261.053	155.306	51.4952	377.581	383.105
P02794	Ferritin heavy chain	FTH1	21.2256	7.9658e-05	0.942814	154.3	364.613	121.446	350.858	351.963	193.323	597.503	204.923	251.078	81.0102	460.354	431.155
P02795	Metallothionein-2	MT2A	6.04216	8.35047e-05	0.940064		107.47	41.6055			58.9408		22.6399	17.9823		34.9879	407.166
P03886	NADH-ubiquinone oxidoreductase chain 1	MT-ND1	35.6606	0.000157841	0.917226	221.89	232.267	280.064	244.38	291.901	191.742	173.93	203.725	196.658	193.988	168.589	191.222
P03897	NADH-ubiquinone oxidoreductase chain 3	MT-ND3	13.1861	0.000158997	0.916109	435.395	554.967	595.304	478.063	661.707	486.629	306.493	363.051	439.251	351.832	286.269	234.922
P03905	NADH-ubiquinone oxidoreductase chain 4	MT-ND4	51.5809	0.00131377	0.849868	148.914	144.044	200.546	157.626	197.605	124.149	130.237	144.398	167.196	145.506	135.432	139.316
P03915	NADH-ubiquinone oxidoreductase chain 5	MT-ND5	67.0265	0.000135931	0.926368	97.8576	82.2017	102.884	98.7812	139.479	83.3882	71.9367	75.6439	74.6712	74.7262	38.272	67.5821
P03923	NADH-ubiquinone oxidoreductase chain 6	MT-ND6	18.6221	0.000436216	0.884333	519.511	479.043	630.067	522.641	778.922	429.123	591.481	525.42	587.873	517.743	390.085	312.762
P03928	ATP synthase protein 8	MT-ATP8	7.99164	7.07872e-05	0.952764	1071.28	1404.4	1464.48	1155.21	898.973	988.906	866.94	901.591	883.773	877.785	441.269	619.755
P03950	Angiogenin	ANG	16.5501	7.65639e-05	0.945809	175.24	91.4805	132.253	90.3531	121.302	151.432	236.44	104.725	58.5682	40.8068	161.293	77.8094
P03951	Coagulation factor XI	F11	70.1091	0.000207044	0.900552		34.4788				22.1965		13.4488	15.3258		29.3647	24.7414
P03952	Plasma kallikrein	KLKB1	71.3697	7.54661e-05	0.946503	125.588	164.668	96.4558	80.4862	93.2794	114.24	137.957	105.642	68.4856	73.4491	171.685	120.486
P04003	C4b-binding protein alpha chain	C4BPA	67.0332	1.36252e-05	0.972126	158.825	134.538	376.412	44.713	50.5481	130.054	147.083	288.978	76.7561	69.0997	283.306	144.513
P04004	Vitronectin	VTN	54.3056	7.07872e-05	0.954825	1250.38	2440.53	763.242	659.105	932.299	730.342	1218.26	774.028	565.969	523.4	2055.97	960.827
P04040	Catalase	CAT	59.7562	6.72261e-05	0.96231	990.437	516.907	916.392	779.774	1315.01	705.737	899.325	775.54	803.406	892.628	1413.48	617.423
P04049	RAF proto-oncogene serine/threonine-protein kinase	RAF1	73.0516	0.000157841	0.917189	68.2915	70.2101	62.9769	56.291	62.8623	57.1775	40.7702	63.2845	77.5347	66.5531	58.9209	64.1746
P04062	Lysosomal acid glucosylceramidase	GBA	59.7163	7.23262e-05	0.949094	311.867	314.2	486.665	220.884	367.109	360.645	267.261	326.652	336.962	319.922	229.807	284.902
P04066	Tissue alpha-L-fucosidase	FUCA1	53.6889	0.000158715	0.916293	153.851	154.388	201.852	152.661	197.806	157.014	130.265	142.001	192.68	209.765	164.907	196.028
P04070	Vitamin K-dependent protein C	PROC	52.0713	7.52784e-05	0.946847	147.677	514.74	116.166	69.4721	89.9894	67.648	163.752	75.8094	111.146	67.8938	113.353	97.341
P04075	Fructose-bisphosphate aldolase A	ALDOA	39.42	7.07872e-05	0.955833	314.278	315.405	492.231	389.352	437.511	378.408	404.749	399.853	357.453	347.854	493.394	427.345
P04080	Cystatin-B	CSTB	11.1396	3.84383e-05	0.96757	237.828	263.292	328.253	461.876	293.529	434.476	405.419	296.6	325.633	191.859	377.29	486.841
P04083	Annexin A1	ANXA1	38.7142	2.00704e-07	0.981471	1429.81	1221.07	1562.45	978.499	1136.11	1192.35	1645.54	1225.09	1559.31	1294.75	832.279	989.165
P04114	Apolipoprotein B-100	APOB	515.605	2.67411e-05	0.969402	195.379	112.867	249.327	147.777	249.326	188.531	207.632	275.13	262.298	116.763	262.767	110.235
P04150	Glucocorticoid receptor	NR3C1	85.6593	7.07872e-05	0.954624	77.2339	38.7189		58.9195	56.5843	34.4924	43.7663	26.4388	41.3832	40.9117	41.9159	48.305
P04156	Major prion protein	PRNP	27.6612	0.000158715	0.916405	155.158	156.549	150.323	163.633	159.475	188.923	216.326	182.747	247.213	162.72	178.724	150.28
P04179	Superoxide dismutase [Mn], mitochondrial	SOD2	24.7501	7.07872e-05	0.955197	294.346	308.769	616.908	283.574	400.754	270.451	703.467	236.215	247.156	184.036	355.548	261.2
P04180	Phosphatidylcholine-sterol acyltransferase	LCAT	49.5779	0.00217748	0.809278	147.519	80.1789	90.7993	114.616	117.577	106.16	84.3379	82.7012	71.8843		246.598	86.9718
P04181	Ornithine aminotransferase, mitochondrial	OAT	48.5348	0.000174595	0.909252	91.1205	60.8497	90.9268	60.2377	76.0438	89.8639	78.1652	46.4979	56.4734	56.6165		59.0735
P04196	Histidine-rich glycoprotein	HRG	59.5783	7.95095e-05	0.943317	60.0297	63.5473	142.354	111.689	162.43	82.4118	99.4299	146.401	72.7117	101.997	280.428	158.062
P04216	Thy-1 membrane glycoprotein	THY1	17.9347	0.000154409	0.919838	544.216	569.004	292.5	392.933	589.551	829.555	804.775	379.816	266.001	439.269	493.088	370.824
P04217	Alpha-1B-glycoprotein	A1BG	54.2535	1.92377e-05	0.97082	513.784	408.52	328.282	312.828	462.929	353.553	553.212	386.889	233.796	238.715	697.02	462.578
P04233	HLA class II histocompatibility antigen gamma chain	CD74	33.5156	7.56746e-05	0.946418	114.871	109.232	340.107	94.7686	86.73	83.5784	214.998	64.8031	139.611	67.6253	91.389	74.6972
P04259	Keratin, type II cytoskeletal 6B	KRT6B	60.0669	7.07872e-05	0.953925	927.059	549.744	744.172	522.787	1059	605.808	621.524	720.52	715.756	639.598	976.268	765.015
P04264	Keratin, type II cytoskeletal 1	KRT1	66.0387	7.17034e-05	0.950634	229.337	209.439	320.914	189.496	555.852	251.605	115.771	261.323	290.947	177.225	408.73	273.412
P04275	von Willebrand factor	VWF	309.265	4.17263e-05	0.967094	186.43	166.207	222.643	155.623	120.127	93.9368	103.794	105.231	90.216	137.773	158.924	101.878
P04278	Sex hormone-binding globulin	SHBG	43.7792	6.72261e-05	0.962135	157.32	156.173	73.6238	124.561	158.277	144.72	270.904	117.285	106.514	47.2516	192.204	208.161
P04350	Tubulin beta-4A chain	TUBB4A	49.5858	0.000245208	0.895555	321.528	323.037	273.075	439.598	400.979	310.662	477.897	445.824	335.77	248.561	447.607	395.446
P04406	Glyceraldehyde-3-phosphate dehydrogenase	GAPDH	36.0532	5.93096e-05	0.964223	929.042	757.854	1614.56	1241.15	1330.05	1061.68	1426.7	962.014	1057.56	1081.67	1675.44	1235.86
P04424	Argininosuccinate lyase	ASL	51.658	0.000135511	0.926459	105.938	95.221	132.073	129.339	158.851	133.092	173.739	107.386	84.9177	86.9453	169.823	131.961
P04430	Immunoglobulin kappa variable 1-16	IGKV1-16	12.6183	7.07872e-05	0.956382	88.7605	188.049	263.932	53.7264	147.427	65.1264	89.1885	113.11	189.02	100.169	165.814	176.2
P04439	HLA class I histocompatibility antigen, A alpha chain	HLA-A	40.8407	7.07872e-05	0.955924	283.988	409.51	644.637	256.379	223.939	202.176	456.423	326.577	221.633	218.415	246.32	279.677
P04440	HLA class II histocompatibility antigen, DP beta 1 chain	HLA-DPB1	29.1593	0.00175824	0.818836			419.706
P04626	Receptor tyrosine-protein kinase erbB-2	ERBB2	137.91	0.00033918	0.888734	68.1049	66.9785	85.9067	66.8613	40.357	64.1581	61.457	79.246	97.745	95.2385	69.2965	61.7485
P04632	Calpain small subunit 1	CAPNS1	28.3157	4.43934e-05	0.966735	328.794	283.85	283.233	341.001	343.199	321.956	311.393	324.698	324.928	314.074	450.625	239.751
P04792	Heat shock protein beta-1	HSPB1	22.7825	7.07872e-05	0.954609	2053.77	2678.89	3447.71	2080.57	1913.99	2397.65	2719.67	3058.96	2553.68	3451.79	2143.6	1571.37
P04839	Cytochrome b-245 heavy chain	CYBB	65.3359	7.07872e-05	0.956091	132.991	119.799	168.354	110.337	125.74	145.745	148.799	111.221	101.165	104.539	108.904	107.339
P04843	Dolichyl-diphosphooligosaccharide--protein glycosyltransferase subunit 1	RPN1	68.5694	7.07872e-05	0.9529	431.465	458.938	561.381	449.863	439.508	431.38	451.784	441.825	480.143	536.679	326.636	414.8
P04844	Dolichyl-diphosphooligosaccharide--protein glycosyltransferase subunit 2	RPN2	69.284	7.07872e-05	0.955222	818.148	873.483	1023.85	778.412	793.105	828.154	805.717	868.948	934.194	1024.47	648.641	840.392
P04899	Guanine nucleotide-binding protein G(i) subunit alpha-2	GNAI2	40.4509	7.07872e-05	0.9605	1402.19	1474.58	1161.37	1327.42	1294.41	1347.68	1154.33	1275.51	1129.58	1076.57	1014.37	1150.65
P04908	Histone H2A type 1-B/E	H2AC4	14.1355	0.000568594	0.879641	57.2731	43.9836	95.0776	100.191	75.4028	68.642	124.808	64.7009	79.911	102.586	59.8819	47.4798
P04920	Anion exchange protein 2	SLC4A2	137.009	0.000216989	0.898942	92.8398	101.095	99.3149	118.663	90.046	95.8478	91.0369	110.241	150.701	89.7286	75.4572	84.0168
P05023	Sodium/potassium-transporting ATPase subunit alpha-1	ATP1A1	112.896	7.07872e-05	0.960505	508.454	475.501	520.627	473.681	539.272	458.5	454.821	533.6	490.234	504.951	379.657	410.419
P05026	Sodium/potassium-transporting ATPase subunit beta-1	ATP1B1	35.0613	7.17419e-05	0.950404	331.447	252.585	252.511	242.276	235.268	254.393	200.519	222.634	177.874	272.034	197.158	254.52
P05067	Amyloid-beta precursor protein	APP	86.9432	0.000188377	0.904487	92.8735	106.418	102.731	78.8656	92.4685	84.9409	97.6391	101.681	79.5057	78.1339	84.156	84.6055
P05089	Arginase-1	ARG1	34.7349	0.000499695	0.88195	114.188	66.0681	149.607	121.609	141.087	93.9105	119.961	119.903	123.819	99.3107	128.91	81.515
P05090	Apolipoprotein D	APOD	21.2755	0.000112271	0.931476	775.724	686.392	1021.22	539.163	672.727	983.237	328.977	813.827	844.171	546.603	550.95	533.395
P05091	Aldehyde dehydrogenase, mitochondrial	ALDH2	56.3813	8.23126e-05	0.941033	121.582	116.657	567.361	242.658	116.16	360.051	390.092	235.338	213.6	211.198	138.064	214.612
P05106	Integrin beta-3	ITGB3	87.0578	7.07872e-05	0.953085	372.819	270.742	285.841	142.25	298.138	247.427	220.445	309.073	285.259	228.03	324.034	263.496
P05107	Integrin beta-2	ITGB2	84.7818	7.17396e-05	0.950447	136.158	160.894	198.044	91.0306	109.592	118.204	184.173	103.73	96.3109	86.1342	112.605	89.3416
P05108	Cholesterol side-chain cleavage enzyme, mitochondrial	CYP11A1	60.1023	4.48365e-05	0.966687	1273.72	1268.64	1494.86	1998.13	922.569	999.261	1236.01	1576.16	1471.26	1896.16	855.488	999.847
P05109	Protein S100-A8	S100A8	10.8345	8.71581e-05	0.938284	387.293	199.813	375.396	215.693	255.474	247.971	365.797	238.868	196.872	137.687	436.663	225.03
P05111	Inhibin alpha chain	INHA	39.6697	0.00133486	0.84051			157.651	75.2397	80.4219			103.064	165.277	146.021		120.631
P05120	Plasminogen activator inhibitor 2	SERPINB2	46.5962	5.46902e-05	0.965076	691.583	564.83	613.344	633.07	482.995	495.1	462.591	666.881	657.017	674.263	544.576	575.571
P05121	Plasminogen activator inhibitor 1	SERPINE1	45.06	8.30349e-05	0.940435	205.425	137.964	224.931	109.499	126.81	102.929	223.8	105.668	147.157	129.805	387.078	194.377
P05141	ADP/ATP translocase 2	SLC25A5	32.8522	3.2484e-10	0.989468	546.549	594.573	509.655	605.342	566.696	559.272	371.827	541.553	538.785	491.803	316.036	457.422
P05154	Plasma serine protease inhibitor	SERPINA5	45.6747	0.000187455	0.904748	118.638	111.519	53.266	104.412	124.365	136.529	105.09	112.868	74.0847	60.8879	125.146	89.6926
P05155	Plasma protease C1 inhibitor	SERPING1	55.1542	5.77877e-05	0.964595	313.492	318.957	433.175	306.998	350.658	372.836	612.606	393.566	267.82	270.837	560.469	349.008
P05156	Complement factor I	CFI	65.7502	9.11558e-05	0.936748	131.227	122.227	128.43	80.3822	98.3998	125.864	133.649	119.687	70.3764	68.6965	222.615	120.021
P05160	Coagulation factor XIII B chain	F13B	75.5107	0.000154418	0.919787	64.4846	70.2624	43.6029	44.6065	44.6777	37.0886	41.6669	46.7754	34.8804	17.4973	144.389	57.9198
P05161	Ubiquitin-like protein ISG15	ISG15	17.8875	6.98133e-05	0.961323	358.693	262.046	362.792	276.36	318.981	218.984	472.984	229.2	270.789	280.173	767.389	688.389
P05164	Myeloperoxidase	MPO	83.8686	7.07872e-05	0.95338	443.941	173.769	466.421	220.087	210.555	299.297	470.96	285.267	249.437	184.638	384.335	160.756
P05165	Propionyl-CoA carboxylase alpha chain, mitochondrial	PCCA	80.0589	0.000106926	0.932721	124.533	143.653	137.958	116.321	146.833	145.604	123.586	125.213	136.297	162.297	93.6309	114.241
P05166	Propionyl-CoA carboxylase beta chain, mitochondrial	PCCB	58.2157	8.98622e-05	0.937215	171.167	184.705	187.018	148.543	182.775	175.35	142.359	166.107	173.888	186.637	131.391	147.084
P05187	Alkaline phosphatase, placental type	ALPP	57.9538	3.05213e-05	0.968861	467.517	613.379	368.145	305.513	411.404	220.913	727.786	616.715	699.392	858.029	344.451	473.19
P05198	Eukaryotic translation initiation factor 2 subunit 1	EIF2S1	36.1122	7.12446e-05	0.951178	192.008	183.14	252.813	203.291	234.126	221.576	215.622	215.833	244.418	251.701	226.531	219.739
P05204	Non-histone chromosomal protein HMG-17	HMGN2	9.39267	7.07872e-05	0.960228	2953.47	2139.58	2740.24	2720.39	1839.96	1887.57	3179.45	2223.79	1535.28	2006.69	1253.52	1675.59
P05362	Intercellular adhesion molecule 1	ICAM1	57.8252	8.61277e-05	0.93882	245.47	287.449	384.882	218.308	250.926	221.818	238.882	261.199	218.871	165.359	161.791	241.251
P05386	60S acidic ribosomal protein P1	RPLP1	11.5139	0.001326	0.846635	907.56	1067.49	1199	939.045	1131.79	911.01	1158.39	1095.08	601.506	895.547	1439.79	1038.37
P05387	60S acidic ribosomal protein P2	RPLP2	11.6649	7.63146e-05	0.945944	513.09	551.776	693.856	523.402	620.252	529.805	545.029	567.318	585.101	478.179	566.702	519.698
P05388	60S acidic ribosomal protein P0	RPLP0	34.2735	7.89851e-05	0.943845	507.126	538.991	614.278	514.208	552.414	503.635	540.628	518.153	587.691	589.623	641.316	577.969
P05413	Fatty acid-binding protein, heart	FABP3	14.858	8.43605e-05	0.939725	77.475	68.0569	65.1027	79.6723	46.9466	180.292	98.3652	58.9851	42.7468	39.4076	63.2526	62.7835
P05423	DNA-directed RNA polymerase III subunit RPC4	POLR3D	44.3958	0.000814279	0.87178	42.7831	40.2461	30.1352	47.9222	34.6304	17.7729	33.4216	42.1881	33.6429	48.1851	27.2409	42.8919
P05452	Tetranectin	CLEC3B	22.5368	7.88382e-05	0.944096	183.273	283.628	379.985	165.758	148.9	358.24	216.639	222.653	123.544	97.6507	305.823	208.507
P05455	Lupus La protein	SSB	46.837	7.00258e-05	0.961286	216.336	217.778	236.441	264.352	223.046	234.228	248.4	202.353	224.562	199.173	264.926	273.817
P05543	Thyroxine-binding globulin	SERPINA7	46.3245	7.07872e-05	0.959288	124.811	122.524	89.3391	82.1672	97.238	113.625	126.429	115.582	68.8876	60.2165	193.077	133.565
P05546	Heparin cofactor 2	SERPIND1	57.0706	7.07872e-05	0.95327	262.194	310.718	175.717	276.655	286.479	232.621	252.198	269.763	165.489	144.337	366.019	266.778
P05549	Transcription factor AP-2-alpha	TFAP2A	48.0621	0.000156584	0.918273	194.348	88.1495	124.189	139.157	39.8147	73.1921	121.285	84.6236	108.818	124.076	88.1807	130.905
P05556	Integrin beta-1	ITGB1	88.4153	5.45408e-05	0.965141	461.812	522.578	466.343	419.133	443.903	399.077	396.604	456.574	388.614	408.829	443.389	421.714
P05771	Protein kinase C beta type	PRKCB	76.869	0.00412315	0.795798		26.4501	43.7025									47.0737
P05783	Keratin, type I cytoskeletal 18	KRT18	48.0578	2.43543e-05	0.969818	2006.01	2113.61	1460.79	1734.18	2191.83	1994.31	2666.12	1955.9	2091.75	2173.2	2389.2	1974.41
P05787	Keratin, type II cytoskeletal 8	KRT8	53.7042	3.97638e-06	0.975494	1412.52	1313.28	1540.35	1206.1	1482.5	1430.45	1964.15	1340.85	1534.71	1819.09	1775.76	1329.36
P05997	Collagen alpha-2(V) chain	COL5A2	144.91	0.00333022	0.799864	63.246	57.0854				87.0243
P06132	Uroporphyrinogen decarboxylase	UROD	40.7869	7.62874e-05	0.946036	179.901	147.91	222.475	246.959	290.352	215.472	192.626	163.553	200.175	160.002	217.851	195.465
P06213	Insulin receptor	INSR	156.333	8.8309e-05	0.937758	89.0376	102.58	151.254	87.2071	96.4312	115.828	106.67	134.111	156.497	135.027	105.503	100.312
P06241	Tyrosine-protein kinase Fyn	FYN	60.7619	0.00165245	0.821641		23.8841		46.2546	32.6844	35.6488	44.4893	51.7952	40.439			49.9093
P06280	Alpha-galactosidase A	GLA	48.7668	0.00153637	0.824991	49.4678	36.4143	41.3842		53.19	30.3288	65.5911	53.8023	40.2806	43.4747		35.7459
P06312	Immunoglobulin kappa variable 4-1	IGKV4-1	13.38	7.52784e-05	0.946786	816.677	1066.58	2165.36	603.759	1257.92	784.676	1164.54	838.269	789.158	536.463	897.331	772.209
P06396	Gelsolin	GSN	85.6975	9.75696e-07	0.978777	395.31	422.649	373.142	318.043	402.449	420.5	466.684	360.697	311.932	302.305	382.052	342.032
P06400	Retinoblastoma-associated protein	RB1	106.159	0.00133475	0.842538	42.3224	33.5327		51.0283	38.2161	35.801	21.9032	44.8267	34.361	36.2289	31.3848	37.9564
P06454	Prothymosin alpha	PTMA	12.203	0.000201221	0.90157	801.431	665.821	995.881	1303.06	964.862	1030.34	1314.23	713.032	953.527	563.38	999.508	1458.3
P06493	Cyclin-dependent kinase 1	CDK1	34.0954	0.00133475	0.842267	25.1046	35.7486	37.4835	51.9627	44.947	20.4239		23.4273	22.3639		31.5799	46.7981
P06576	ATP synthase subunit beta, mitochondrial	ATP5F1B	56.5599	2.43543e-05	0.969862	1020.18	1088.03	1131.78	1176.11	1086.7	994.296	1123.88	1132.92	1053.87	1291.25	897.504	886.994
P06681	Complement C2	C2	83.2678	7.88662e-05	0.943939	145.177	113.568	113.217	90.5326	107.359	127.12	169.248	105.426	80.7575	79.8069	208.074	129.708
P06702	Protein S100-A9	S100A9	13.242	7.07872e-05	0.955918	742.238	342.028	857.02	466.057	585.444	487.848	814.244	524.973	384.57	334.981	1020.75	445.835
P06703	Protein S100-A6	S100A6	10.1797	0.000199312	0.901927	46.3962	35.6685	55.6948	35.3012	44.0885	50.3838	86.9126	46.2001	41.9206	41.8907	39.6618	33.9081
P06727	Apolipoprotein A-IV	APOA4	45.372	7.07872e-05	0.959507	279.061	317.73	249.165	204.789	257.81	228.956	306.737	314.11	140.377	213.036	501.865	326.175
P06730	Eukaryotic translation initiation factor 4E	EIF4E	25.0972	0.000148085	0.922682	178.618	240.397	256.792	204.512	116.695	191.772	160.496	235.848	211.316	198.172	205.035	288.177
P06733	Alpha-enolase	ENO1	47.169	6.39068e-05	0.963198	473.238	360.41	642.256	622.906	584.864	536.316	700.643	434.518	466.163	342.653	730.556	705.286
P06737	Glycogen phosphorylase, liver form	PYGL	97.1486	9.96501e-06	0.973163	315.35	232.521	216.71	352.566	336.719	310.455	330.508	246.86	128.812	227.881	391.321	342.259
P06744	Glucose-6-phosphate isomerase	GPI	63.1471	1.39406e-09	0.987943	319.259	304.745	402.112	484.383	410.919	451.221	541.415	313.613	308.083	256.937	444.188	469.392
P06746	DNA polymerase beta	POLB	38.1776	0.00131185	0.850217	49.7381	84.2656	77.0733	64.4934	76.0079	60.5676	64.1442	70.9602	61.4313	41.3212	41.3787	55.6692
P06748	Nucleophosmin	NPM1	32.575	7.52784e-05	0.946615	143.47	126.326	123.426	162.311	114.989	123.974	140.878	138.527	139.166	126.203	198.066	138.491
P06753	Tropomyosin alpha-3 chain	TPM3	32.95	3.70264e-05	0.967832	280.4	331.27	309.41	287.003	302.911	430.093	374.933	271.759	223.755	228.917	333.541	261.012
P06756	Integrin alpha-V	ITGAV	116.038	7.07872e-05	0.958744	224.335	220.516	259.576	155.809	219.686	226.019	208.179	301.403	289.263	261.019	203.065	253.889
P06850	Corticoliberin	CRH	21.4218	0.000115473	0.930755	153.627	87.8151	343.004	67.4033	47.7638	98.9288	96.3973	127.389	197.538	80.6412	52.8021
P06858	Lipoprotein lipase	LPL	53.1625	0.000230105	0.897274	43.2156	62.5177	38.1651	61.4343		102.549		191.691	57.6994	171.655
P06865	Beta-hexosaminidase subunit alpha	HEXA	60.7028	0.000181445	0.906853	105.856	106.472	136.39	106.797	176.044	125.52	166.521	85.1506	105.195	121.484	127.314	128.908
P07093	Glia-derived nexin	SERPINE2	44.0022	7.07872e-05	0.952191	221.94	294.517	60.492	100.809	134.766	117.402	389.448	90.0476	164.005	49.9391	734.415	223.161
P07099	Epoxide hydrolase 1	EPHX1	52.9489	8.17454e-05	0.941408	166.814	168.767	124.403	151.635	174.85	193.788	204.118	162.803	97.3202	132.535	136.255	126.75
P07108	Acyl-CoA-binding protein	DBI	10.0444	7.93276e-05	0.943717	340.221	223.682	430.734	450.225	345.098	425.353	502.304	300.937	303.076	182.256	323.003	484.437
P07195	L-lactate dehydrogenase B chain	LDHB	36.6385	5.87937e-05	0.964384	416.902	349.544	479.138	487.204	629.169	466.497	463.255	320.97	371.458	373.313	500.015	622.178
P07199	Major centromere autoantigen B	CENPB	65.1713	0.000169384	0.911158	132.872	48.7672	107.926	108.203	64.8788	121.374	113.799	106.55	94.9672	111.631	64.8567	107.581
P07203	Glutathione peroxidase 1	GPX1	22.0882	7.35348e-05	0.947901	307.001	290.62	377.564	365.858	335.931	341.176	361.725	290.569	303.056	255.889	314.179	390.641
P07204	Thrombomodulin	THBD	60.3294	7.07872e-05	0.954218	230.57	332.297	224.175	246.385	121.639	204.188	142.928	291.69	191.701	104.616	245.036	189.932
P07225	Vitamin K-dependent protein S	PROS1	75.1226	7.07872e-05	0.959332	102.148	169.867	138.357	70.1341	90.1435	96.2136	145.053	109.29	69.1082	77.6575	120.476	72.0167
P07237	Protein disulfide-isomerase	P4HB	57.1164	1.15984e-10	0.990675	1398.98	1184.19	1576.18	1387.97	1997.37	1596.07	1417.94	1377.2	1979.04	1637.56	1762.19	1776.27
P07305	Histone H1.0	H1-0	20.8629	3.46921e-05	0.968308	413.645	533.208	464.666	452.748	319.167	283.554	366.541	377.47	195.898	460.695	359.584	218.257
P07332	Tyrosine-protein kinase Fes/Fps	FES	93.4966	0.00129355	0.852194	61.1528	42.369	72.9134	68.2679	73.0125	66.0831	75.8021	52.0146	61.4624	44.8649	67.0554	67.0262
P07333	Macrophage colony-stimulating factor 1 receptor	CSF1R	107.984	0.000170163	0.910791	72.0584	102.91	74.9593	65.015	77.5871	86.6888	77.147	87.6219	71.1622	64.3942	111.759	88.5103
P07339	Cathepsin D	CTSD	44.5522	2.27753e-05	0.970151	459.295	453.233	785.077	597.573	394.883	447.271	495.139	365.023	409.299	431.899	432.505	587.241
P07355	Annexin A2	ANXA2	38.604	5.77877e-05	0.96461	1905.83	2142.54	2008.6	1668.11	2005.69	2022.5	2362.05	1865.07	1674.65	1759.07	1666.02	1619.03
P07357	Complement component C8 alpha chain	C8A	65.1632	3.56247e-06	0.975825	160.887	199.637	178.762	118.272	130.034	156.122	148.906	113.105	61.3145	50.8019	264.999	163.943
P07358	Complement component C8 beta chain	C8B	67.0469	7.07872e-05	0.95423	181.339	195.005	199.502	128.425	175.427	190.04	197.678	116.055	62.902	65.49	285.608	147.98
P07359	Platelet glycoprotein Ib alpha chain	GP1BA	71.54	0.00124675	0.855838	78.8746	71.3425	78.6342	52.9854	75.6495	65.43	81.2535	66.4989	68.8299	68.2549	95.115	42.4923
P07360	Complement component C8 gamma chain	C8G	22.2775	9.99621e-05	0.934188	235.828	232.527	236.892	189.695	199.048	204.02	245.928	139.66	76.031	88.7472	356.457	208.978
P07384	Calpain-1 catalytic subunit	CAPN1	81.8901	7.07276e-05	0.961156	308.08	295.726	237.141	290.261	356.093	293.434	272.215	356.271	325.34	347.534	394.495	265.737
P07437	Tubulin beta chain	TUBB	49.6708	8.6052e-05	0.938864	1753.56	1829.21	1556.25	1929.2	2088.79	1868.44	1884.5	1824.91	1588.49	1664	1487.19	2109.56
P07451	Carbonic anhydrase 3	CA3	29.5574	0.00133853	0.837199		57.2638	55.6173	5.94068	40.8656		113.291	29.2368		56.1447	59.804
P07550	Beta-2 adrenergic receptor	ADRB2	46.4587	0.00331947	0.799922		47.1352						39.849
P07585	Decorin	DCN	39.7468	7.1396e-05	0.95102	1467.12	2112.29	1449.35	1416.44	1073.7	2254.88	1386.33	852.106	567.748	1246.97	1035.66	1123.74
P07602	Prosaposin	PSAP	58.1126	7.07872e-05	0.95636	257.703	296.191	232.4	191.42	168.623	257.237	224.533	250.487	198.61	209.919	309.121	306.848
P07686	Beta-hexosaminidase subunit beta	HEXB	63.1113	7.07872e-05	0.957239	244.509	193.292	285.045	238.251	352.443	243.27	287.795	198.192	237.994	210.127	474.864	440.621
P07711	Procathepsin L	CTSL	37.5641	7.17419e-05	0.95035	95.6617	108.669	139.446	115.331	161.136	123.825	119.256	90.5844	98.4288	73.4404	112.111	150.999
P07737	Profilin-1	PFN1	15.0542	9.95273e-05	0.934311	904.711	819.416	1068.69	1176.2	1011.7	982.372	1188.66	778.022	715.976	496.337	1150.21	1379.54
P07738	Bisphosphoglycerate mutase	BPGM	30.0052	7.07872e-05	0.958135	993.641	616.782	1206.16	1097.04	1268.89	948.454	839.951	900.508	1015.04	937.235	1131.07	778.174
P07741	Adenine phosphoribosyltransferase	APRT	19.6078	7.23262e-05	0.949611	362.492	241.691	512.888	618.932	517.85	469.066	600.15	298.737	382.703	303.111	362.313	563.646
P07814	Bifunctional glutamate/proline--tRNA ligase	EPRS1	170.591	4.64377e-05	0.966377	151.576	174.025	172.258	173.481	168.853	166.074	157.562	187.387	172.829	169.202	198.135	182.372
P07858	Cathepsin B	CTSB	37.8216	2.95634e-06	0.976281	191.099	170.337	207.617	169.311	180.093	182.435	188.675	152.577	177.03	155.339	209.918	299.004
P07900	Heat shock protein HSP 90-alpha	HSP90AA1	84.6597	1.14028e-06	0.978431	582.068	558.573	696.467	741.751	755.684	716.491	712.31	749.748	739.337	749.989	942.815	749.472
P07902	Galactose-1-phosphate uridylyltransferase	GALT	43.3631	8.24877e-05	0.940817	120.681	150.908	131.588	164.712	128.004	140.809	130.849	173.285	138.807	181.863	162.909	164.316
P07910	Heterogeneous nuclear ribonucleoproteins C1/C2	HNRNPC	33.67	8.32169e-05	0.940245	1423.36	1334.68	1058.69	1437.7	1117.7	1257.14	1250.67	1517.73	1493.09	1588.27	1643.34	1422.57
P07919	Cytochrome b-c1 complex subunit 6, mitochondrial	UQCRH	10.7388	0.000166052	0.912521	1568.59	3064.4	2648	2086.68	1490.76	1780.42	916.629	1464.1	1657.16	1963.79	2182.43	2419.09
P07942	Laminin subunit beta-1	LAMB1	198.038	3.56655e-05	0.968076	278.781	340.336	286.323	277.232	263.416	350.845	199.791	246.979	187.245	223.563	258.813	247.456
P07947	Tyrosine-protein kinase Yes	YES1	60.8012	7.07872e-05	0.959631	123.147	124.093	120.294	145.375	120.526	144.113	110.982	151.976	149.283	113.802	139.394	134.175
P07948	Tyrosine-protein kinase Lyn	LYN	58.5741	6.13763e-05	0.963883	249.163	214.749	345.019	249.879	190.833	258.791	227.635	235.814	320.913	268.984	222.364	219.845
P07951	Tropomyosin beta chain	TPM2	32.8507	7.8749e-05	0.944214	412.801	693.723	437.943	446.609	373.185	847.796	629.323	296.016	234.646	211.244	309.143	300.812
P07954	Fumarate hydratase, mitochondrial	FH	54.637	5.32085e-05	0.965346	168.316	190.222	193.893	229.284	192.315	185.214	187.099	182.852	179.496	227.666	143.255	170.863
P07996	Thrombospondin-1	THBS1	129.383	1.115e-05	0.972816	225.395	254.121	224.431	155.608	242.184	244.107	347.813	169.04	168.567	149.257	559.146	221.266
P07998	Ribonuclease pancreatic	RNASE1	17.6442	0.000104733	0.933123	27.0294	54.991	37.3241	16.64	30.8702	43.9269	42.7046	30.9924	40.1687	21.9789	40.0853	112.822
P08047	Transcription factor Sp1	SP1	80.6929	0.000322885	0.889677	42.8712	27.8733	23.9712	61.6662	44.3655	27.766	35.7972	20.1633	24.35	24.4594	21.5616	40.893
P08069	Insulin-like growth factor 1 receptor	IGF1R	154.793	0.000214974	0.899256	63.9904	78.7798	72.6411	60.1889	61.2374	62.3033	63.7745	62.7938	68.2885	57.0823	49.3858	60.6945
P08123	Collagen alpha-2(I) chain	COL1A2	129.314	5.75974e-05	0.964641	133.205	135.629	137.293	81.6419	74.7002	161.319	93.1882	48.287	70.9116	132.256	134.004	105.712
P08133	Annexin A6	ANXA6	75.8733	7.89883e-06	0.973794	679.152	812.494	698.303	702.244	754.407	948.505	787.004	806.326	819.022	721.65	562.691	612.763
P08134	Rho-related GTP-binding protein RhoC	RHOC	22.0064	0.000143616	0.924119	2708.15	2788.98	3263.05	3556.3	3930.18	3308.91	2537.39	2376.09	2619.56	1855.15	2414.72	4244.32
P08138	Tumor necrosis factor receptor superfamily member 16	NGFR	45.1834	0.000164519	0.913225	113.596	49.0427	56.8332	69.9575	59.7153	86.9432	21.14	69.2225	87.3973	29.1088	117.162	81.1659
P08174	Complement decay-accelerating factor	CD55	41.4001	7.35348e-05	0.947941	403.924	413.364	563.495	235.64	357.195	383.604	239.132	799.727	451.316	401.603	466.577	387.005
P08183	ATP-dependent translocase ABCB1	ABCB1	141.479	0.000211004	0.899863	104.76	96.317	95.2237	141.171	125.636	166.197	73.2005	136.563	214.397	102.845	129.416	122.928
P08185	Corticosteroid-binding globulin	SERPINA6	45.1409	2.94912e-05	0.968996	540.237	581.786	317.144	393.756	566.198	413.71	604.105	506.439	260.511	324.322	842.553	776.918
P08195	4F2 cell-surface antigen heavy chain	SLC3A2	67.994	6.49444e-05	0.963025	273.536	284.238	339.763	260.584	208.399	231.562	284.007	379.071	336.307	455.013	249.406	235.706
P08236	Beta-glucuronidase	GUSB	74.7319	7.07872e-05	0.957976	236.429	163.274	202	149.732	203.254	253.559	167.247	204.316	187.487	163.578	178.764	179.107
P08237	ATP-dependent 6-phosphofructokinase, muscle type	PFKM	85.1825	9.72536e-05	0.934886	145.806	160.18	126.977	160.558	166.362	169.661	169.669	125.166	123.469	125.516	183.098	118.191
P08238	Heat shock protein HSP 90-beta	HSP90AB1	83.2642	1.96251e-11	0.992337	729.659	664.543	846.292	907.216	895.879	830.037	788.18	822.033	841.611	848.66	1223.57	989.225
P08240	Signal recognition particle receptor subunit alpha	SRPRA	69.8112	0.000117769	0.930307	98.1179	107.492	85.6703	99.7354	96.6581	109.195	112.745	95.6619	100.641	106.177	82.7279	115.797
P08243	Asparagine synthetase [glutamine-hydrolyzing]	ASNS	64.3699	0.000817861	0.87166					16.5098					18.2696		21.9537
P08246	Neutrophil elastase	ELANE	28.5181	0.000157841	0.917173	3649.36	1680.76	3909.94	1626.84	1621.85	2093.35	6264.85	2869.87	1651.59	1366.48	3062.9	995.792
P08253	72 kDa type IV collagenase	MMP2	73.8823	0.00014821	0.922472	12.3156	26.2987			18.7979	28.0941	18.367	26.7987			45.5568	35.681
P08263	Glutathione S-transferase A1	GSTA1	25.6311	0.000166907	0.91208							57.5723					16.3042
P08294	Extracellular superoxide dismutase [Cu-Zn]	SOD3	25.8509	8.79767e-05	0.937955	355.976	386.181	258.122	354.123	430.208	502.693	452.947	341.232	291.374	433.879	492.031	406.895
P08311	Cathepsin G	CTSG	28.8372	3.75772e-05	0.967724	180.111	75.7956	121.835	85.624	75.4677	84.3513	189.626	66.8518	47.8858	55.7606	62.9698	44.7813
P08319	All-trans-retinol dehydrogenase [NAD(+)] ADH4	ADH4	40.2217	0.00142064	0.829176	12180.8	14476.1	12184.1	6666.11	8116.9	9507.66	8739.96	9801.04	12247.3	7431.75	16694	10208.9
P08397	Porphobilinogen deaminase	HMBS	39.3301	6.13763e-05	0.963874	137.971	77.7359	139.208	155.25	188	141.843	146.202	105.486	147.527	139.863	150.084	102.374
P08473	Neprilysin	MME	85.5139	5.46902e-05	0.965046	176.67	139.407	268.972	112.093	175.897	141.636	140.556	183.625	185.212	168.637	151.019	154.936
P08476	Inhibin beta A chain	INHBA	47.4423	0.000170966	0.910501	65.5969	26.3712	340.239	58.4039	75.1408	59.6742	75.7165	51.293	97.4794	127.106		36.8244
P08493	Matrix Gla protein	MGP	12.3532	7.07872e-05	0.955408	2289.44	3386.86	1487.67	1349.68	1590.6	2722.76	3210.15	1276.05	1125	489.317	3441.49	1227.77
P08514	Integrin alpha-IIb	ITGA2B	113.377	7.30482e-05	0.948289	285.869	223.347	212.085	130.595	253.191	157.799	235.914	155.387	95.5926	105.398	252.81	149.296
P08519	Apolipoprotein(a)	LPA	501.319	0.00964957	0.773406	104.399	144.223	134.991		55.7747	60.5768	72.5729	112.465			186.294
P08559	Pyruvate dehydrogenase E1 component subunit alpha, somatic form, mitochondrial	PDHA1	43.2956	7.07872e-05	0.957511	226.707	238.209	216.598	235.779	213.524	213.631	200.81	234.62	192.454	199.713	184.893	160.362
P08567	Pleckstrin	PLEK	40.1249	0.000156584	0.918387	146.779	90.787	110.557	106.994	112.044	143.042	134.025	98.3247	75.7859	70.1695	117.164	124.191
P08571	Monocyte differentiation antigen CD14	CD14	40.0762	8.19294e-05	0.941219	239.271	182.701	202.435	191.252	207.926	243.915	261.65	217.711	281.683	189.533	260.551	174.303
P08572	Collagen alpha-2(IV) chain	COL4A2	167.553	7.07872e-05	0.955911	173.745	216.805	170.589	116.314	127.795	143.465	98.3625	110.944	109.782	124.484	187.063	127.664
P08574	Cytochrome c1, heme protein, mitochondrial	CYC1	35.422	7.07872e-05	0.953219	187.346	176.407	203.238	227.106	231.614	184.679	195.134	210.216	215.528	224.13	132.145	157.679
P08575	Receptor-type tyrosine-protein phosphatase C	PTPRC	147.486	9.07562e-05	0.936873	89.0979	72.8479	124.406	78.205	89.4009	79.734	116.551	73.2367	73.4221	63.9051	72.2654	72.2613
P08579	U2 small nuclear ribonucleoprotein B''	SNRPB2	25.4863	7.85128e-05	0.944337	126.561	121.472	112.88	113.009	99.3444	111.942	109.993	117.748	108.098	136.595	157.797	104.207
P08581	Hepatocyte growth factor receptor	MET	155.541	0.00530302	0.79015	68.4866	62.1912	54.4917	55.226	102.05	66.8826	85.4408	76.2288	63.635		68.1709	35.4236
P08582	Melanotransferrin	MELTF	80.2146	0.000111919	0.931567	53.5811	46.8541			32.9935		73.5355		39.184
P08588	Beta-1 adrenergic receptor	ADRB1	51.3228	0.000179464	0.907509	175.458	190.402	121.072	75.5214	193.013	165.181	149.921	212.351	143.218	138.678	156.991	149.582
P08590	Myosin light chain 3	MYL3	21.9321	0.000311681	0.890357	174.195	157.014	143.233	253.436	144.178	156.313	117.664	63.7015	92.3299	114.134	85.2706	54.4947
P08603	Complement factor H	CFH	139.096	1.35768e-05	0.972152	401.061	369.565	358.774	212.945	256.924	310.421	240.635	311.67	203.286	159.241	576.161	320.377
P08621	U1 small nuclear ribonucleoprotein 70 kDa	SNRNP70	51.5567	2.04413e-13	0.996432	281.321	296.742	294.545	282.751	269.141	283.228	302.972	295.783	247.388	345.364	205.332	243.696
P08631	Tyrosine-protein kinase HCK	HCK	59.5998	0.000780627	0.87281	57.79	128.899		78.7703	60.0769	64.6194	79.3525	52.5189	53.5812	52.2712	80.9652	86.4578
P08637	Low affinity immunoglobulin gamma Fc region receptor III-A	FCGR3A	29.0891	0.000225857	0.897798	67.7789	73.72	22.7354	47.8743	36.2407	42.3357	65.6013	36.4778			44.5131	69.4399
P08648	Integrin alpha-5	ITGA5	114.536	5.32085e-05	0.965334	345.872	327.791	489.448	255.816	346.472	304.64	310.22	392.721	333.214	378.751	369.773	315.062
P08651	Nuclear factor 1 C-type	NFIC	55.675	0.00299544	0.801799	80.346			10.5936	46.1482	38.6333	47.5173	32.7383	25.0385	20.5412		35.6705
P08670	Vimentin	VIM	53.6517	3.47913e-05	0.968289	3152.62	2969.61	1959.01	2830.97	3419.19	3055.53	3849.31	2503.99	2449.48	2532.36	3208.79	2107.17
P08697	Alpha-2-antiplasmin	SERPINF2	54.5658	5.79817e-05	0.964515	201.876	236.865	152.761	148.512	201.154	208.941	205.46	187.112	98.1544	91.0159	459.035	222.084
P08708	40S ribosomal protein S17	RPS17	15.5501	7.66996e-05	0.945593	701.865	785.88	903.054	665.322	732.27	663.867	607.378	723.462	737.948	705.253	604.374	753.155
P08709	Coagulation factor VII	F7	51.5939	0.000165965	0.91257	57.9766	101.539	46.0781	46.7094	44.6057	48.7923	78.8805	35.5956	32.2581	17.1319	66.2569	39.5435
P08727	Keratin, type I cytoskeletal 19	KRT19	44.106	2.22527e-84	1.06086	3193.69	2452.66	3928.09	1918.72	2442.55	2313.29	3947.7	2787.77	3219.3	3956.8	3536.03	2663.91
P08729	Keratin, type II cytoskeletal 7	KRT7	51.3857	4.23606e-05	0.967	2464.85	2283.81	2355.57	1339.98	2340.28	1570.19	3222.56	2295.42	2199.35	2552.44	2719.65	1854.09
P08754	Guanine nucleotide-binding protein G(i) subunit alpha-3	GNAI3	40.5322	7.23262e-05	0.949075	224.899	265.289	245.538	250.84	228.43	256.724	270.644	202.125	235.881	215.356	154.275	188.566
P08758	Annexin A5	ANXA5	35.9368	2.32873e-06	0.976906	1135.91	818.346	1237.83	931.854	1116.21	1140.7	1343.06	900.486	1054.62	679.02	756.517	841.004
P08779	Keratin, type I cytoskeletal 16	KRT16	51.2678	0.000216627	0.898994	69.8094	66.4925	163.958	43.168	776.919	57.3572	65.3707	64.2514	124.118	55.6169	132.319	92.7806
P08833	Insulin-like growth factor-binding protein 1	IGFBP1	27.9037	7.88662e-05	0.943978	260.027	6759.95	219.082	74.5544	361.634	130.374	7003.41	168.527	115.714	385.026	873.958	814.111
P08842	Steryl-sulfatase	STS	65.4923	6.66706e-05	0.962496	628.761	669.91	972.405	604.952	875.8	1117.62	582.277	717.455	763.711	928.654	545.849	661.754
P08865	40S ribosomal protein SA	RPSA	32.8541	7.07872e-05	0.951848	793.928	709.698	1048.17	659.344	644.881	829.878	750.396	777.857	874.989	742.197	673.846	767.839
P08913	Alpha-2A adrenergic receptor	ADRA2A	50.6467	0.00105837	0.863656	36.3658	58.3726	32.1601	24.6069	46.2635	48.8175	29.2476	40.9704	25.4678		38.1967
P08962	CD63 antigen	CD63	25.6366	0.000107054	0.932698	395.954	408.961	586.71	289.796	483.223	333.128	428.781	329.387	362.979	331.051	342.999	222.98
P09001	39S ribosomal protein L3, mitochondrial	MRPL3	38.6326	0.00657616	0.784836	31.0758	8.12835	33.2414	11.9146	65.7609	33.3726		42.7948	32.58	41.0672
P09012	U1 small nuclear ribonucleoprotein A	SNRPA	31.2795	8.30353e-05	0.940367	175.755	153.324	106.9	158.196	125.177	142.904	148.791	122.373	133.789	174.98	192.632	158.202
P09038	Fibroblast growth factor 2	FGF2	30.77	0.00117073	0.859341	148.479	149.996	111.622	144.611	136.922	128.923	125.203	97.8796	98.6143	109.293	121.788	75.6071
P09104	Gamma-enolase	ENO2	47.2686	7.14886e-05	0.950732	146.674	107.371	94.478	141.728	124.932	113.372	221.836	80.3223	83.3542	78.9994	127.91	81.9915
P09105	Hemoglobin subunit theta-1	HBQ1	15.5078	0.00011533	0.930831	180.86	71.048	116.189	89.2741	210.383	116.861	129.6	99.5685	109.326	136.718	205.819	58.2957
P09110	3-ketoacyl-CoA thiolase, peroxisomal	ACAA1	44.292	0.000162942	0.913882	91.7381	76.6304	85.3193	58.9784	55.1374	64.914	85.5994	57.5372	67.0026	65.3223	42.7637	60.9013
P09132	Signal recognition particle 19 kDa protein	SRP19	16.1557	0.000119786	0.929743	76.2269	89.5397	73.4246	60.2273	61.4381	55.1671	61.5219	64.3927	72.7503	50.4972	42.5077	76.1745
P09211	Glutathione S-transferase P	GSTP1	23.3558	7.07872e-05	0.958315	1030.38	737.019	1132.22	982.258	663.725	818.817	892.172	905.437	688.005	605.349	1125.39	1077.85
P09234	U1 small nuclear ribonucleoprotein C	SNRPC	17.3937	7.62874e-05	0.945964	531.847	422.207	338.173	434.512	372.278	443.218	407.03	476.575	515.625	511.107	327.044	467.687
P09382	Galectin-1	LGALS1	14.7157	7.07872e-05	0.959751	657.391	941.174	570.518	533.61	483.531	799.08	641.782	506.341	476.282	440.116	604.756	640.699
P09417	Dihydropteridine reductase	QDPR	25.7895	7.07872e-05	0.957772	181.192	156.007	165.56	221.857	205.301	229.993	193.014	138.558	118.429	120.168	186.185	241.051
P09429	High mobility group protein B1	HMGB1	24.8938	3.56597e-05	0.968111	328.078	269.322	344.537	448.526	454.704	398.805	343.517	340.921	386.961	265.07	317.283	416.8
P09455	Retinol-binding protein 1	RBP1	15.8502	7.37486e-05	0.947757	76.6565	113.668	106.842	187.817	122.635	118.942	731.446	94.5445	47.7396	37.0145	113.137	196.676
P09466	Glycodelin	PAEP	20.6242	7.23262e-05	0.949582	158.762	327.94		49.7918	510.212	146.502	2527.09	60.2855	143.98	59.2218	442.014	264.301
P09467	Fructose-1,6-bisphosphatase 1	FBP1	36.8425	0.000189471	0.904252	59.0655	46.364	179.735	104.097	60.7225	81.1119	229.325	57.6627	37.1415	28.2774	81.6981	82.7273
P09471	Guanine nucleotide-binding protein G(o) subunit alpha	GNAO1	40.0506	7.23262e-05	0.949186		73.4785		46.0241	33.3082	73.5276	112.922
P09486	SPARC	SPARC	34.6322	0.000152317	0.920897	234.814	354.201	254.095	200.308	223.494	310.566	159.853	217.967	225.8	173.315	389.754	295.691
P09493	Tropomyosin alpha-1 chain	TPM1	32.7086	0.000106842	0.93276	579.147	715.551	523.93	501.391	477.204	1016.28	653.984	364.313	246.716	300.724	453.697	388.223
P09496	Clathrin light chain A	CLTA	27.0767	7.07872e-05	0.956092	323.397	342.709	388.748	350.98	346.806	395.927	343.56	361.786	363.704	333.019	291.339	264.371
P09497	Clathrin light chain B	CLTB	25.1905	7.07872e-05	0.954443	1077.48	1081.25	1115.59	855.213	888.725	863.801	1069.75	1032.38	1106.07	1148.79	871.99	829.064
P09525	Annexin A4	ANXA4	35.8827	7.07872e-05	0.958348	938.077	1244.55	1611.09	888.016	869.394	781.042	1015.97	1069.64	994.137	1157.41	926.232	975.473
P09543	2',3'-cyclic-nucleotide 3'-phosphodiesterase	CNP	47.5786	7.17034e-05	0.950618	221.31	198.715	204.287	243.846	236.906	220.748	246.719	215.471	196.964	201.896	196.558	202.749
P09564	T-cell antigen CD7	CD7	25.409	0.00665506	0.78452		11.6599				14.3168		6.10149
P09601	Heme oxygenase 1	HMOX1	32.8186	7.07872e-05	0.954573	138.136	161.664	221.116	153.113	141.193	156.17	152.216	161.65	151.227	165.322	168.122	185.251
P09619	Platelet-derived growth factor receptor beta	PDGFRB	123.968	0.000140011	0.925289	100.515	116.749	78.9118	100.778	107.209	124.97	106.98	84.0444	84.3649	81.9341	61.412	71.7755
P09622	Dihydrolipoyl dehydrogenase, mitochondrial	DLD	54.1773	7.94044e-05	0.943591	438.754	477.23	502.076	489.712	436.047	492.025	401.439	483.607	431.13	521.481	404.281	376.797
P09651	Heterogeneous nuclear ribonucleoprotein A1	HNRNPA1	38.7467	6.13973e-05	0.963795	534.61	425.236	365.695	584.802	513.034	541.266	475.3	488.732	610.263	573.084	553.717	663.965
P09661	U2 small nuclear ribonucleoprotein A'	SNRPA1	28.4156	7.07872e-05	0.95986	291.435	304.326	161.476	337.173	305.673	281.409	297.793	337.635	345.817	431.136	325.839	344.738
P09668	Pro-cathepsin H	CTSH	37.3936	0.000157841	0.917279	94.527	79.2774	182.702	72.9789	77.0402	54.0972	108.522	68.3947	95.9992	50.2573	163.481	124.951
P09669	Cytochrome c oxidase subunit 6C	COX6C	8.78143	8.19205e-05	0.941291	110.71	121.833	118.246	108.481	142.206	130.306	129.767	116.418	120.344	123.907	91.0868	94.5673
P09758	Tumor-associated calcium signal transducer 2	TACSTD2	35.7094	0.000188323	0.904505	154.318	215.251	245.623	157.786	109.954	284.666	151.048	275.71	275.004	200.347	201.157	149.875
P09871	Complement C1s subcomponent	C1S	76.6844	6.75753e-05	0.962039	107.043	110.949	132.675	86.7805	142.478	113.06	170.534	140.719	99.219	105.506	191.566	73.0014
P09874	Poly [ADP-ribose] polymerase 1	PARP1	113.084	7.07872e-05	0.959275	153.062	142.017	132.141	164.551	204.942	177.811	150.719	163.216	170.933	154.219	146.572	208.274
P09884	DNA polymerase alpha catalytic subunit	POLA1	165.913	0.00161644	0.822651	399.639	422.494			7.66907	293.899	250.206	326.529			226.414	282.097
P09913	Interferon-induced protein with tetratricopeptide repeats 2	IFIT2	54.6322	0.00014821	0.922576	68.9226	91.7187	129.121	89.1205	90.4522	78.6489	104.609	86.9529	79.316	75.2593	83.968	131.568
P09914	Interferon-induced protein with tetratricopeptide repeats 1	IFIT1	55.3603	7.62874e-05	0.946001	64.3386	66.2643	96.4851	77.3193	89.3071	68.2565	115.421	83.4231	70.2267	86.6449	90.0713	108.893
P09917	Polyunsaturated fatty acid 5-lipoxygenase	ALOX5	77.9832	9.14941e-05	0.936613	123.665	93.3537	113.914	84.6993	105.397	97.5234	139.527	89.7113	130.772	161.507	66.6181	90.4317
P09923	Intestinal-type alkaline phosphatase	ALPI	56.8122	0.00133486	0.840641	47.0032	17.3104	1.63478		21.8044	17.1872	70.5886	17.0826		6.1197	17.5548
P09936	Ubiquitin carboxyl-terminal hydrolase isozyme L1	UCHL1	24.8243	7.45585e-05	0.947339	47.8885	17.0069			52.7372	22.7147	183.384		25.1721		68.2133	49.8124
P09958	Furin	FURIN	86.678	2.67474e-12	0.994218	104.95	124.428	100.781	115.655	121.704	102.107	95.8598	121.49	105.208	105.255	78.5777	114.776
P09960	Leukotriene A-4 hydrolase	LTA4H	69.2853	7.23262e-05	0.949582	131.182	108.322	224.714	187.127	161.297	173.583	206.144	118.873	117.683	91.0862	198.923	183.601
P09972	Fructose-bisphosphate aldolase C	ALDOC	39.4559	0.000118305	0.930199	73.0648	74.1719	170.73	96.876	106.831	85.5199	225.297	49.8859	113.485	54.7597	84.7856	82.094
P0C0L4	Complement C4-A	C4A	192.785	2.43543e-05	0.96982	480.746	319.21	445.443	610.294	370.403	386.619	549.941	394.239	381.682	267.518	841.479	477.977
P0C0L5	Complement C4-B	C4B	192.751	7.65639e-05	0.945834	494.263	357.042	800.43	610.631	481.711	399.346	688.71	452.353	477.567	190.745	656.823	319.612
P0C0S5	Histone H2A.Z	H2AZ1	13.5527	0.000152913	0.920607	369.272	308.054	721.429	476.036	346.504	499.478	662.915	360.298	425.792	618.273	295.369	184.749
P0C1Z6	TCF3 fusion partner	TFPT	28.2783	0.00245477	0.805831		56.4195				57.1275	68.2381		49.3045	55.2363		35.4748
P0C2W1	F-box/SPRY domain-containing protein 1	FBXO45	30.6327	0.000155394	0.919283	41.4815	25.7392	28.9107			24.9185		24.9029				27.7002
P0C7P0	CDGSH iron-sulfur domain-containing protein 3, mitochondrial	CISD3	14.2156	0.000171631	0.910234						23.1031		42.6597				28.8219
P0C870	Bifunctional peptidase and (3S)-lysyl hydroxylase JMJD7	JMJD7	35.9321	0.00732697	0.781915	41.6928			38.7778	30.5949						40.534	34.4104
P0CAP1	Myocardial zonula adherens protein	MYZAP	54.2055	8.71356e-05	0.938323	115.148	81.677	67.4442	109.432	103.937	105.815	74.5923	102.717	116.888	116.681	66.4698	78.8438
P0CG12	Decreased expression in renal and prostate cancer protein	DERPC	51.3913	0.00171551	0.81993	108.106	38.5956		111.484	109.466	108.393	121.684	111.45	106.582	108.544		151.239
P0CG29	Glutathione S-transferase theta-2	GSTT2	27.506	0.000879388	0.869684		51.7837	70.1331	139.869		119.035	104.529		128.648		111.17
P0CG40	Transcription factor Sp9	SP9	48.915	0.000158715	0.91628	134.904	108.102		164.587		83.3453	164.163	75.6905		125.458	101.335
P0CJ79	Zinc finger protein 888	ZNF888	83.5491	0.00109948	0.86217	13.8999	15.1922	66.8869	20.8377	29.9188			22.8486	21.3909	20.0311	24.3409	27.5019
P0CW19	LIM and senescent cell antigen-like-containing domain protein 3	LIMS3	13.2509	0.000156584	0.91827	109.323	209.453	141.213	58.3051	120.012	173.348	91.8623	87.3795	202.584	81.5101		186.845
P0DI81	Trafficking protein particle complex subunit 2	TRAPPC2	16.4447	0.00139292	0.830563	101.124	127.978	134.023	124.899	108.647	120.373	128.539	134.873	112.546	133.167	120.073	117.176
P0DJ07	Protein PET100 homolog, mitochondrial	PET100	9.11357	0.00131377	0.849842	148.29			71.2147			126.888	128.456		132.769		115.729
P0DJ93	Small integral membrane protein 13	SMIM13	10.3508	0.000294301	0.89152	115.901	106.41	49.5103	85.7634	132.061	86.1301	107.67	102.784	137.607	125.75		86.2794
P0DJD1	RANBP2-like and GRIP domain-containing protein 2	RGPD2	197.308	0.00152955	0.825205	41.3131	29.9991	7.09413			29.894	25.9826		22.5421	80.1133	21.6453	25.3851
P0DJI9	Serum amyloid A-2 protein	SAA2	13.5271	0.000396923	0.885923							211.842		27.889	322.205
P0DML2	Chorionic somatomammotropin hormone 1	CSH1	25.0204	7.07276e-05	0.961164	2666.85	2456.21	3930.71	3294.93	4178.17	3533.36	2526.01	2454.1	4202.98	3073.44	2065.95	3411.05
P0DMM9	Sulfotransferase 1A3	SULT1A3	34.1962	0.00016546	0.912837	86.3308	87.0866	110.855	159.113	131.189	159.469	85.222	77.0879	145.749	66.3167	96.7131	174.996
P0DMV8	Heat shock 70 kDa protein 1A	HSPA1A	70.0522	5.87937e-05	0.964406	1151.56	1148.76	1139.44	1241.32	1164.34	1163.1	1276.28	1317.67	1248.69	1345.77	986.961	982.697
P0DOX2	Immunoglobulin alpha-2 heavy chain		48.9342	5.87937e-05	0.964349	197.551	643.774	562.825	206.562	367.291	337.482	520.139	273.953	214.096	160.447	537.373	305.042
P0DOX5	Immunoglobulin gamma-1 heavy chain		49.3288	3.78777e-05	0.96765	2717.8	1816.76	3458.28	1475.75	2033.78	1897.01	2717.87	2108.3	1682.08	1092.66	2603.07	2033.83
P0DOX7	Immunoglobulin kappa light chain		23.3791	9.18602e-05	0.93646	1578.02	1947.1	2183.88	1255.59	2026.62	1372.68	1951.4	1730.97	1334.82	1006.82	2034.06	1659.02
P0DOY2	Immunoglobulin lambda constant 2	IGLC2	11.2936	0.000149726	0.921868	5731.71	6608.83	11544.8	2197.25	3342.59	4297.44	3211.95	4163.32	3078.94	1061.67	4364.03	3917.33
P0DP23	Calmodulin-1	CALM1	16.8376	7.07872e-05	0.951762	1050.92	1027.8	1330.24	1113.67	1176.94	1095.78	1375.7	1064.39	942.471	988.661	1175.99	953.082
P0DPB6	DNA-directed RNA polymerases I and III subunit RPAC2	POLR1D	15.2372	0.00131848	0.849177	18.058	23.7328			8.8642			25.1027	25.6263	80.6267	52.6074	40.4434
P0DPK3	Notch homolog 2 N-terminal-like protein B	NOTCH2NLB	30.0969	0.00131644	0.849555		36.5644	75.2429						28.5702	25.2314		118.454
P0DTE1	Probable non-functional immunoglobulin heavy variable 3-38-3	IGHV3-38-3	12.6715	0.00560631	0.788818			157.426		43.4214			81.8209	64.4404
P10109	Adrenodoxin, mitochondrial	FDX1	19.3927	7.07872e-05	0.957385	1711.83	1646.33	1891.43	2038.61	1727.49	1480.62	1600.09	1916.36	2350.46	2078.17	1061.16	1912.76
P10114	Ras-related protein Rap-2a	RAP2A	20.6154	0.00956911	0.773679					31.1527	24.293
P10155	60 kDa SS-A/Ro ribonucleoprotein	RO60	60.6706	1.07932e-05	0.97296	227.772	251.872	215.415	259.968	212.467	228.581	246.406	227.094	255.42	229.162	284.589	279.829
P10253	Lysosomal alpha-glucosidase	GAA	105.324	7.93789e-05	0.943619	390.723	315.117	489.343	377.917	430.158	450.289	418.733	200.673	620.918	258.253	396.561	433.49
P10301	Ras-related protein R-Ras	RRAS	23.4805	7.07872e-05	0.951566	366.673	423.249	239.334	433.531	345.274	414.055	483.187	371.27	359.352	351.089	318.295	340.17
P10321	HLA class I histocompatibility antigen, C alpha chain	HLA-C	40.6485	6.81662e-05	0.961851	319.919	171.9	718.071	192.826	208.549	143.38	162.241	145.382	154.862	227.368	189.496	174.841
P10398	Serine/threonine-protein kinase A-Raf	ARAF	67.5854	0.00116085	0.859764	54.8457	78.6869	57.0634	88.0604	60.1411	74.8984	69.6683	80.8811	89.6468	92.3324	57.7083	73.9699
P10412	Histone H1.4	H1-4	21.8653	3.39806e-05	0.968424	1831.67	1890.59	1843.62	1810.32	1679.17	1218.19	1151.45	1858.89	950.499	1766.63	1441.09	1264.99
P10415	Apoptosis regulator Bcl-2	BCL2	26.2659	0.000119371	0.929863	345.303	374.802	363.039	383.603	275.393	299.607	367.315	380.304	346.391	345.198	280.604	212.576
P10451	Osteopontin	SPP1	35.4227	7.91492e-05	0.943769	134.19	531.599	47.1006	75.7526	97.0324	139.856	1035.64	99.6353	125.09	57.8561	541.795	219.415
P10515	Dihydrolipoyllysine-residue acetyltransferase component of pyruvate dehydrogenase complex, mitochondrial	DLAT	68.9967	7.73727e-05	0.944966	116.456	124.987	126.671	140.368	122.72	130.789	127.001	133.704	136.671	145.006	103.364	88.1551
P10586	Receptor-type tyrosine-protein phosphatase F	PTPRF	212.879	7.07872e-05	0.952081	94.9285	95.4537	127.705	82.1892	93.6157	88.8161	107.708	135.074	133.216	140.44	126.956	107.573
P10588	Nuclear receptor subfamily 2 group F member 6	NR2F6	42.979	0.00127821	0.853524	104.752	90.3974	114.771	127.033	88.8522	90.4914	123.374	115.523	71.6399	98.1043	87.8731	100.218
P10589	COUP transcription factor 1	NR2F1	46.1556	0.00545661	0.789471	23.3749			26.0375	67.3218	21.4808		12.8272	21.7403	22.9546		30.3134
P10599	Thioredoxin	TXN	11.7375	7.62738e-05	0.946057	732.392	712.299	847.109	671.742	703.727	619.724	1451.82	536.94	548.151	434.769	651.612	637.569
P10606	Cytochrome c oxidase subunit 5B, mitochondrial	COX5B	13.6957	7.23262e-05	0.949371	590.302	772.562	725.166	628.974	893.478	806.419	832.142	716.874	726.234	723.568	501.15	654.198
P10619	Lysosomal protective protein	CTSA	54.4661	7.07872e-05	0.953037	277.335	305.644	336.472	218.399	272.023	218.097	185.646	238.073	266.157	219.776	279.445	321.811
P10620	Microsomal glutathione S-transferase 1	MGST1	17.5987	9.55698e-05	0.935363	139.698	107.394	25.8204	108.425	173.191	47.1547	991.385	113.762	43.628	98.6771	326.344
P10636	Microtubule-associated protein tau	MAPT	78.9276	7.07872e-05	0.953091	144.326	164.225	62.6992	216.427	216.386	142.302	111.92	138.579	99.9073	86.408	200.033	164.489
P10643	Complement component C7	C7	93.5182	2.95634e-06	0.976278	114.438	125.719	170.167	97.6725	110.98	125.183	118.734	133.532	80.8134	60.756	203.778	119.106
P10644	cAMP-dependent protein kinase type I-alpha regulatory subunit	PRKAR1A	42.9817	8.33901e-05	0.94016	291.762	306.953	253.446	284.46	328.814	371.649	312.721	305.311	303.056	299.229	313.923	344.721
P10646	Tissue factor pathway inhibitor	TFPI	35.0151	7.93436e-05	0.943647	64.5907	68.1785	106.781	46.8543	57.376	71.781	68.8629	64.1589	68.8605	48.8179	78.5609	101.992
P10696	Alkaline phosphatase, germ cell type	ALPG	57.377	0.000260686	0.89407		18.8388							9.60938			135.797
P10746	Uroporphyrinogen-III synthase	UROS	28.6277	0.000215488	0.899179	65.3356	26.1799	98.3297	51.4955	69.2524	66.3133	45.2131	32.3435	63.7291	72.6948	40.0567	48.1015
P10768	S-formylglutathione hydrolase	ESD	31.4628	7.07872e-05	0.953891	194.984	189.816	206.604	243.31	205.038	301.267	228.254	169.601	139.739	110.022	242.65	302.845
P10809	60 kDa heat shock protein, mitochondrial	HSPD1	61.0546	5.61004e-05	0.96487	253.866	287.253	264.348	302.549	261.077	257.827	199.812	274.11	291.142	288.627	239.445	244.432
P10909	Clusterin	CLU	52.4946	6.30393e-05	0.963367	708.393	666.816	411.326	432.088	590.221	368.373	610.568	439.761	199.597	274	844.724	442.057
P10915	Hyaluronan and proteoglycan link protein 1	HAPLN1	40.1656	0.000102782	0.93357	119.974	197.479	340.259	137.075	201.254	301.46	62.2122	172.568	101.493	342.488	134.251	218.211
P11021	Endoplasmic reticulum chaperone BiP	HSPA5	72.333	8.65001e-08	0.982811	1710.73	1685.99	2646.31	2147.38	2253.88	1933.14	1931.1	1961.21	2662.66	2358.86	1843.1	2259.43
P11047	Laminin subunit gamma-1	LAMC1	177.603	1.13234e-05	0.972769	278.184	374.29	332.789	316.779	310.813	334.204	216.509	259.853	188.859	279.534	274.837	206.685
P11117	Lysosomal acid phosphatase	ACP2	48.3443	0.000156716	0.91817	342.596	327.628	200.075	251.327	373.671	278.294	245.727	242.68	327.883	260.148	238.904	291.415
P11142	Heat shock cognate 71 kDa protein	HSPA8	70.8981	7.07872e-05	0.958161	2061.96	2091.3	2217.25	2420.75	2441.3	2217.77	2107.07	2320.53	2395.08	2635.22	2895.76	2330.03
P11166	Solute carrier family 2, facilitated glucose transporter member 1	SLC2A1	54.0838	4.3905e-05	0.966797	1144.37	1154.7	1712.75	1241.93	1301	1121.69	1254.99	1433.74	1561.21	1810.99	1181.76	785.508
P11169	Solute carrier family 2, facilitated glucose transporter member 3	SLC2A3	53.9243	0.000161519	0.914766	175.208	117.394	176.505	90.9258	166	67.4509	114.055	113.998	72.269	99.1494	121.405	67.6294
P11171	Protein 4.1	EPB41	97.0169	5.29389e-05	0.965433	299.788	159.329	232.126	158.975	298.008	142.858	237.658	216.027	192.652	321.405	194.973	62.156
P11172	Uridine 5'-monophosphate synthase	UMPS	52.2216	0.000417884	0.885042	121.333	132.152	131.876	168.226	143.711	156.524	157.23	132.37	129.009	136.486	144.823	166.997
P11177	Pyruvate dehydrogenase E1 component subunit beta, mitochondrial	PDHB	39.2334	2.9124e-05	0.969053	290.124	385.628	264.046	296.549	285.685	289.855	296.71	325.987	275.839	261.296	262.904	284.451
P11182	Lipoamide acyltransferase component of branched-chain alpha-keto acid dehydrogenase complex, mitochondrial	DBT	53.4871	7.07498e-05	0.961056	129.394	146.799	138.921	139.509	157.155	150.213	119.772	148.554	156.256	160.656	113.277	119.265
P11215	Integrin alpha-M	ITGAM	127.178	0.000120221	0.929663	107.135	93.3324	128.994	81.2686	78.7633	87.0529	170.319	81.4257	74.0702	77.4429	93.8309	70.2814
P11216	Glycogen phosphorylase, brain form	PYGB	96.6959	7.07872e-05	0.95726	212.139	145.149	250.52	213.056	199.152	299.892	247.171	203.962	256.986	199.295	248.43	198.302
P11217	Glycogen phosphorylase, muscle form	PYGM	97.0921	7.07872e-05	0.952446	221.354	175.879	188.644	224.308	210.024	254.229	273.684	168.874	165.907	150.007	265.236	189.853
P11233	Ras-related protein Ral-A	RALA	23.5668	0.000136385	0.926246	505.399	386.793	435.459	457.849	487.789	406.79	480.03	448.637	424.313	561.876	291.357	301.393
P11234	Ras-related protein Ral-B	RALB	23.4086	7.66996e-05	0.94564	134.575	144.364	156.851	136.38	136.374	175.429	136.876	144.821	174.334	161.738	121.361	130.259
P11274	Breakpoint cluster region protein	BCR	142.819	0.000145038	0.923752	107.337	100.99	127.796	120.867	68.8702	98.1792	118.801	138.679	161.321	149.391	97.4088	107.387
P11277	Spectrin beta chain, erythrocytic	SPTB	246.468	4.77729e-05	0.966233	443.809	253.585	354.13	218.723	433.598	214.221	308.213	302.524	264.503	414.009	244.126	91.9124
P11279	Lysosome-associated membrane glycoprotein 1	LAMP1	44.8824	7.07872e-05	0.956351	1065.52	942.604	1093.55	928.492	862.662	868.348	910.028	816.435	792.255	907.839	734.336	794.929
P11308	Transcriptional regulator ERG	ERG	53.8375	0.0081423	0.778811	19.9017	5.35969		1.45447	4.49861	3.73926			4.47232
P11310	Medium-chain specific acyl-CoA dehydrogenase, mitochondrial	ACADM	46.5883	7.69286e-05	0.945485	159.135	176.44	250.447	202.47	244.303	197.088	177.944	140.11	184.515	167.919	161.097	121.511
P11362	Fibroblast growth factor receptor 1	FGFR1	91.8677	0.00421901	0.79533	54.339	20.5477	767.214	69.8032	89.7899	83.1032	107.735		55.2322		77.4661	538.921
P11387	DNA topoisomerase 1	TOP1	90.7257	6.69524e-05	0.962388	259.404	252.446	383.485	235.952	174.214	213.014	242.696	228.289	225.545	233.433	185.28	216.194
P11388	DNA topoisomerase 2-alpha	TOP2A	174.385	0.00131918	0.849029	62.4757	46.2372	41.9292	45.1015	51.8865	41.1973	41.7361	39.7102		74.7103	45.0803	64.0602
P11413	Glucose-6-phosphate 1-dehydrogenase	G6PD	59.2567	6.45578e-06	0.974358	218.519	225.882	227.987	243.51	253.444	251.969	304.859	231.948	215.365	226.698	288.064	218.275
P11441	Ubiquitin-like protein 4A	UBL4A	17.7765	0.000162353	0.914277	247.491	268.914	242.008	212.998	200.334	207.67	220.487	214.506	246.963	229.957	192.076	186.514
P11464	Pregnancy-specific beta-1-glycoprotein 1	PSG1	47.2227	7.84067e-05	0.944384	650.786	646.695	710.205	870.048	715.319	905.321	670.584	640.321	856.635	777.035	788.691	1247.58
P11465	Pregnancy-specific beta-1-glycoprotein 2	PSG2	37.216	7.37538e-05	0.947728	100.235	299.251	224.688	530.316	496.124	306.237	331.532	207.421	386.644	160.521	203.799	273.576
P11498	Pyruvate carboxylase, mitochondrial	PC	129.634	9.40161e-05	0.935822	129.428	186.133	111.853	147.684	177.444	158.254	188.331	161.11	173.795	154.241	128.024	164.236
P11511	Aromatase	CYP19A1	57.883	6.72261e-05	0.962219	1433.25	1230.89	1272.29	1134.83	1371.41	1080.52	1065.82	1145.03	1331.72	1261.71	837.32	1119.4
P11532	Dystrophin	DMD	426.75	0.000445314	0.883981	47.3427	47.634	25.9748	42.8447	46.9089	57.1105	28.5889	39.7658	49.3005	68.3905	45.6719	27.672
P11586	C-1-tetrahydrofolate synthase, cytoplasmic	MTHFD1	101.531	7.81076e-05	0.944581	231.188	175.349	179.141	250.799	228.116	239.769	174.232	203.585	207.074	200.86	277.538	249.91
P11597	Cholesteryl ester transfer protein	CETP	54.7562	0.00144833	0.828027	54.3815	117.585		73.998	112.627	91.9874	105.307	52.1594	60.3655	73.8472	94.043	77.7384
P11678	Eosinophil peroxidase	EPX	81.0405	0.000155839	0.919003	174.836	92.6054	98.8218	271.503	104.462	124.776	111.548	67.4283	90.4654	57.4544	114.858	84.0538
P11717	Cation-independent mannose-6-phosphate receptor	IGF2R	274.375	7.37068e-05	0.947779	101.807	122.449	134.02	84.7385	111.225	106.168	86.7075	101.877	101.356	93.7176	109.989	116.511
P11766	Alcohol dehydrogenase class-3	ADH5	39.7242	7.07872e-05	0.95573	105.397	111.493	101.37	151.701	136.36	158.656	157.006	109.042	114.745	67.7546	139.574	169.023
P11908	Ribose-phosphate pyrophosphokinase 2	PRPS2	34.7691	0.0019354	0.814351			74.6043		109.681	51.0519	197.735	46.3526		84.0187	87.6109	71.5918
P11940	Polyadenylate-binding protein 1	PABPC1	70.6708	3.9848e-05	0.967394	410.744	366.986	436.078	379.383	325.291	356.488	390.084	391.685	506.394	554.97	297.502	423.36
P12004	Proliferating cell nuclear antigen	PCNA	28.7688	8.87324e-05	0.937606	220.316	211.598	361.815	276.569	292.037	276.548	191.224	214.854	286.429	238.209	278.873	396.797
P12074	Cytochrome c oxidase subunit 6A1, mitochondrial	COX6A1	12.1548	0.000221483	0.898338	748.748	623.32	984.572	1369.91	1815	1351.78	1698.89	1076.91	1202.27	1195.17	1415.44	599.496
P12081	Histidine--tRNA ligase, cytoplasmic	HARS1	57.4105	8.87388e-05	0.937573	129.929	125.855	139.341	156.578	175.495	158.332	174.155	123.946	126.965	126.526	177.903	167.079
P12109	Collagen alpha-1(VI) chain	COL6A1	108.529	7.07872e-05	0.954644	242.202	287.283	423.72	220.297	255.738	428.385	202.773	207.145	153.669	353.968	354.744	376.22
P12110	Collagen alpha-2(VI) chain	COL6A2	108.579	7.19146e-05	0.9501	265.078	350.842	476.426	225.114	289.491	505.691	230.457	225.056	151.824	389.041	448.322	436.21
P12111	Collagen alpha-3(VI) chain	COL6A3	343.669	8.18601e-06	0.973708	259.536	253.485	394.832	237.093	319.964	483.306	335.075	246.587	185.439	356.23	361.955	415.581
P12235	ADP/ATP translocase 1	SLC25A4	33.0645	7.11744e-05	0.951221	1320.91	1540.03	1449.43	1857.98	1541.66	1816.43	1581.63	1750.28	2242.21	1850.56	1182.68	1327.66
P12236	ADP/ATP translocase 3	SLC25A6	32.8663	7.07872e-05	0.958168	493.172	634.649	425.991	547.318	536.416	557.945	446.265	524.297	585.832	523.22	387.47	484.527
P12259	Coagulation factor V	F5	251.703	7.79166e-05	0.944695	90.4844	78.897	109.111	81.6157	117.252	95.3837	97.6793	84.1071	72.7311	93.3047	100.674	76.4252
P12268	Inosine-5'-monophosphate dehydrogenase 2	IMPDH2	55.805	8.35047e-05	0.940057	124.666	124.825	124.188	151.661	137.63	136.967	107.541	109.465	129.701	112.541	121.499	140.261
P12270	Nucleoprotein TPR	TPR	267.293	7.07498e-05	0.961126	210.787	163.917	144.326	193.464	75.8477	129.347	184.135	154.092	171.492	201.798	161.905	170.209
P12273	Prolactin-inducible protein	PIP	16.5725	0.00131023	0.850435	16.4304	47.7571	33.5314		30.1938	18.0354		31.6652	31.7049		47.8145	27.8505
P12277	Creatine kinase B-type	CKB	42.6443	3.69993e-05	0.967844	187.43	204.039	109.864	183.95	113.858	579.417	338.156	243.313	126.367	90.3331	170.264	127.73
P12314	High affinity immunoglobulin gamma Fc receptor I	FCGR1A	42.6318	8.87324e-05	0.937596	247.89	111.037	178.739	201.269	268.305	192.337	193.725	200.899	199.91	202.601	190.732	202.264
P12318	Low affinity immunoglobulin gamma Fc region receptor II-a	FCGR2A	35.0007	0.00431305	0.794878	5.50916		14.7554	8.20772	14.7294		10.4135	7.27093			14.9397	11.8521
P12429	Annexin A3	ANXA3	36.3753	3.09032e-07	0.980746	441.298	402.114	678.753	401.738	603.579	543.916	658.42	425.969	498.779	287.232	247.563	394.957
P12532	Creatine kinase U-type, mitochondrial	CKMT1A	47.0367	7.79671e-05	0.944674	275.602	435.335	324.414	410.817	376.619	368.358	187.442	384.66	430.494	440.489	392.848	423.061
P12544	Granzyme A	GZMA	28.9988	0.000362363	0.88752			30.042				43.0262		16.2172			6.34348
P12694	2-oxoisovalerate dehydrogenase subunit alpha, mitochondrial	BCKDHA	50.471	0.000103221	0.933484	117.362	140.66	163.02	142.908	169.421	131.437	106.861	135.045	139.63	145.13	98.7302	114.6
P12724	Eosinophil cationic protein	RNASE3	18.3853	0.00791761	0.77965	53.5749				22.5993	29.2349	44.9132	43.7797	29.4414			60.748
P12814	Alpha-actinin-1	ACTN1	103.058	2.36684e-13	0.996249	1123.32	1174.51	1170.23	973.343	1093.27	1447.71	1060.1	859.83	858.074	839.439	1007.62	902.824
P12821	Angiotensin-converting enzyme	ACE	149.715	0.000143333	0.924297	123.053	117.353	172.539	263.346	185.766	112.425	196.344	126.62	171.729	111.218	139.902	89.0307
P12829	Myosin light chain 4	MYL4	21.5646	0.000167652	0.911789	198.957	154.884	170.311	111.498	195.259	159.35	190.688	104.845	136.881	246.605	128.032	59.9281
P12830	Cadherin-1	CDH1	97.4561	7.07872e-05	0.957388	297.368	329.319	306.781	315.52	344.455	312.897	290.454	366.561	392.23	362.184	377.249	290.202
P12882	Myosin-1	MYH1	223.145	0.00146496	0.827345	271.404	124.138	127.981	208.204		179.827	528.908	163.815	223.924	182.429	172.809	120.057
P12883	Myosin-7	MYH7	223.097	0.00913404	0.775206				18.8078
P12931	Proto-oncogene tyrosine-protein kinase Src	SRC	59.8348	0.000311561	0.890367	64.5107	83.6827	60.5832	58.7779	71.2895	88.767	77.5903	60.7244	62.5797	53.582	65.1524	70.1634
P12955	Xaa-Pro dipeptidase	PEPD	54.5482	7.07872e-05	0.954163	113.363	92.68	114.781	130.26	124.945	169.871	122.399	124.106	84.4853	92.1899	159.315	199.18
P12956	X-ray repair cross-complementing protein 6	XRCC6	69.8431	7.07872e-05	0.953133	471.242	498.521	578.15	621.154	715.492	616.811	649.78	622.886	655.593	684.706	702.111	663.288
P13010	X-ray repair cross-complementing protein 5	XRCC5	82.7045	5.93096e-05	0.964223	407.319	441.031	491.606	532.234	488.815	507.626	505.771	515.37	552.741	523.409	620.02	582.723
P13051	Uracil-DNA glycosylase	UNG	34.6455	0.000729674	0.874433	110.122	55.7457	105.304	85.1671	100.252	112.683	93.2959	89.9961	94.4959	101.428	60.3054	98.207
P13056	Nuclear receptor subfamily 2 group C member 1	NR2C1	67.3147	0.0019898	0.813051		528.855								2552.25	40.5526
P13073	Cytochrome c oxidase subunit 4 isoform 1, mitochondrial	COX4I1	19.5767	7.07872e-05	0.960073	806.261	902.892	932.901	810.553	1154.17	896.731	884.567	868.462	810.532	877.444	691.947	770.531
P13196	5-aminolevulinate synthase, nonspecific, mitochondrial	ALAS1	70.5808	0.000847726	0.87067	22.3895	27.7932	29.2853	30.9278	40.516	20.5029	16.9423	23.5114	27.5448	30.7851	12.308	34.4142
P13224	Platelet glycoprotein Ib beta chain	GP1BB	21.7177	0.000162475	0.914235	312.345	181.691	271.702	133.129	257.096	193.98	257.485	161.819	129.525	142.851	285.739	181.107
P13284	Gamma-interferon-inducible lysosomal thiol reductase	IFI30	27.9636	8.00082e-05	0.942627	719.743	312.718	262.996	473.655	471.739	1081.7	261.444	273.826	847.38	348.758	205.689	350.178
P13473	Lysosome-associated membrane glycoprotein 2	LAMP2	44.9607	0.000149926	0.921785	376.21	492.63	444.808	456.193	448.865	496.662	334.695	392.552	487.752	503.125	348.702	470.849
P13489	Ribonuclease inhibitor	RNH1	49.9735	7.07872e-05	0.954127	391.891	397.112	409.62	376.433	419.641	495.86	358.078	352.697	357.923	238.044	542.162	544.575
P13497	Bone morphogenetic protein 1	BMP1	111.249	0.000160118	0.915429	64.4965	80.5438	55.1812	55.7629	70.0518	66.4467	65.0677	61.808	57.3139	56.6338	75.8171	74.0169
P13498	Cytochrome b-245 light chain	CYBA	21.0125	7.07872e-05	0.954368	487.02	411.792	718.995	419.951	413.366	578.553	537.829	375.001	384.482	450.356	332.517	452.759
P13591	Neural cell adhesion molecule 1	NCAM1	94.5742	0.00125223	0.855465	106.282			103.961		16.8665		35.0979				110.568
P13598	Intercellular adhesion molecule 2	ICAM2	30.6543	0.00023048	0.897219	171.928	145.172	113.067	146.155	132.227	117.431	159.699	136.884	137.078	132.498	140.649	115.852
P13611	Versican core protein	VCAN	372.82	7.07872e-05	0.958903	181.133	296.042	192.781	153.206	181.844	307.314	240.881	167.597	146.821	211.489	295.269	221.268
P13612	Integrin alpha-4	ITGA4	114.9	0.000586333	0.879059	56.5292	54.8705	70.0657	68.0133	79.5185	49.1613	45.9215	54.8683	62.6748	73.7493	53.8799	40.5636
P13639	Elongation factor 2	EEF2	95.3381	1.90959e-05	0.97092	589.434	506.135	736.077	684.761	685.794	732.05	637.227	567.534	647.396	552.507	771.747	898.869
P13645	Keratin, type I cytoskeletal 10	KRT10	58.8271	7.07872e-05	0.95443	416.72	397.432	512.254	388.862	853.446	433.17	222.964	482.913	374.668	336.329	787.861	619.643
P13647	Keratin, type II cytoskeletal 5	KRT5	62.3783	8.29451e-05	0.940557	145.878	120.677	180.471	123.344	406.257	127.827	85.7467	145.038	161.828	99.6684	219.926	146.18
P13667	Protein disulfide-isomerase A4	PDIA4	72.9325	3.68086e-05	0.967871	312.178	261.131	411.891	340.007	408.506	352.41	310.223	318.989	397.199	322.346	399.6	454.287
P13671	Complement component C6	C6	104.786	7.23262e-05	0.949041	130.682	127.587	139.188	107.454	116.71	120.872	142.604	134.92	72.7083	53.4395	239.698	143.86
P13674	Prolyl 4-hydroxylase subunit alpha-1	P4HA1	61.0493	8.68064e-05	0.938489	280.214	201.185	264.206	190.547	208.134	213.334	301.426	191.638	190.424	204.5	222.169	194.507
P13688	Carcinoembryonic antigen-related cell adhesion molecule 1	CEACAM1	57.5604	7.07872e-05	0.958421	96.9726	73.0995	124.238	109.995	83.341	77.0202	120.336	107.281	89.0129	109.245	76.0433	75.8239
P13693	Translationally-controlled tumor protein	TPT1	19.5953	8.77138e-05	0.938107	210.364	191.161	221.026	247.13	272.224	250.666	259.255	182.055	226.255	196.235	219.378	306.37
P13716	Delta-aminolevulinic acid dehydratase	ALAD	36.2949	1.91973e-05	0.970874	255.844	147.363	222.538	218.758	334.284	185.116	197.346	206.78	216.226	213.191	282.245	164.468
P13726	Tissue factor	F3	33.0675	0.000103112	0.933511	48.6587	83.9639	70.5997	27.0317	37.8291	70.5699	32.9707	39.7454	21.3518	26.5803	31.4453	33.0154
P13727	Bone marrow proteoglycan	PRG2	25.2055	7.30482e-05	0.948277	2107.17	1424.21	272.405	430.06	523.795	155.259	1887.65	519.648	1052.59	71.1206	7924.01	2954.55
P13747	HLA class I histocompatibility antigen, alpha chain E	HLA-E	40.0576	0.000139342	0.925484	92.8068	87.1728	140.201	100.515	86.3028	84.0067	111.769	88.7228	98.7224	64.6131	80.8471	61.5398
P13762	HLA class II histocompatibility antigen, DR beta 4 chain	HLA-DRB4	29.9411	0.00132778	0.845606	19.6307		81.5739	30.9037				36.9979	42.5506		47.8328	31.8041
P13796	Plastin-2	LCP1	70.2884	7.07872e-05	0.957118	396.445	391.579	536.289	637.391	559.388	388.432	535.023	558.927	424.158	273.588	620.834	698.478
P13797	Plastin-3	PLS3	70.811	7.30704e-06	0.974037	160.727	195.628	168.279	274.817	211.154	241.036	254.089	167.915	143.865	122.301	333.967	286.586
P13798	Acylamino-acid-releasing enzyme	APEH	81.2245	4.43934e-05	0.96674	231.621	169.138	247.406	183.403	299.115	202.432	196.634	222.781	212.263	209.714	366.206	182.021
P13804	Electron transfer flavoprotein subunit alpha, mitochondrial	ETFA	35.0796	6.18359e-05	0.963617	798.488	914.578	824.69	886.964	923.857	857.251	652.372	858.289	947.97	815.027	719.065	897.33
P13807	Glycogen [starch] synthase, muscle	GYS1	83.7855	0.000179045	0.907626	64.7527	65.4445	42.997	44.432	49.2289	52.78	68.2192	48.3926	37.1151	37.9409	97.4777	47.6643
P13861	cAMP-dependent protein kinase type II-alpha regulatory subunit	PRKAR2A	45.5184	1.07932e-05	0.972955	278.513	289.756	207.591	300.543	254.176	277.588	229.339	259.715	226.86	201.931	331.523	285.412
P13928	Annexin A8	ANXA8	36.881	0.000885487	0.869478	362.311	197.072	282.796			268.947	326.876		210.766
P13929	Beta-enolase	ENO3	46.9869	0.000166762	0.912163	693.632	297.323	634.677	648.682	780.747	671.228	676.859	537.338	496.365	374.47	719.109	449.004
P13984	General transcription factor IIF subunit 2	GTF2F2	28.3803	8.79844e-05	0.937922	86.7826	102.525	86.5903	112.965	89.2055	103.11	111.473	106.132	99.3556	103.934	93.9983	120.131
P13987	CD59 glycoprotein	CD59	14.1773	7.07872e-05	0.959276	1264.07	1213.22	1216.57	514.541	745.763	1565.75	518.639	1310.43	1271.25	814.345	945.679	1452.58
P14060	3 beta-hydroxysteroid dehydrogenase/Delta 5-->4-isomerase type 1	HSD3B1	42.2516	7.07872e-05	0.957518	766.586	761.857	1031.42	720.064	740.101	682.407	758.23	728.47	809.244	887.652	481.151	606.534
P14061	17-beta-hydroxysteroid dehydrogenase type 1	HSD17B1	34.9501	5.79817e-05	0.964536	1137.52	1294.1	1396.28	1885.41	1859.03	1735.72	1589.56	1357.03	1376.66	1234.47	1750.96	1451.5
P14151	L-selectin	SELL	42.1871	0.000818872	0.871623	39.48	88.1565	65.2671		62.4445	57.4672					54.695	52.9604
P14174	Macrophage migration inhibitory factor	MIF	12.4763	7.07872e-05	0.956869	7253.84	5610.46	12969.8	7312.59	6305.9	5860.56	11041.7	5498.28	5826.7	3644.56	7687.46	6485.51
P14207	Folate receptor beta	FOLR2	29.2795	7.26032e-05	0.948849	341.959	378.167	215.917	162.307	187.534	304.957	168.535	238.467	164.241	143.189	259.741	306.154
P14209	CD99 antigen	CD99	18.8479	0.000478311	0.88272	326.202	364.316	299.036	295.718	186.992	187.479	394.576	274.566	177.341	254.963	207.367	192.516
P14210	Hepatocyte growth factor	HGF	83.1337	7.81806e-05	0.944512	64.0443	130.155	79.8043	90.7312	97.6027	122.234	60.1915	70.8027	75.6482	124.017	95.349	126.598
P14222	Perforin-1	PRF1	61.3774	0.000734259	0.874286	30.1037	157.851	48.0299	37.3565	31.6295		49.4131	26.5431
P14314	Glucosidase 2 subunit beta	PRKCSH	59.4254	5.32085e-05	0.965341	554.285	506.84	634.296	523.066	731.885	635.609	476.339	682.881	768.546	820.899	733.797	698.659
P14316	Interferon regulatory factor 2	IRF2	39.3544	0.00321896	0.80048	152.689	178.678		270.783			214.991					173.04
P14317	Hematopoietic lineage cell-specific protein	HCLS1	54.014	8.01386e-05	0.942548	155.069	115.139	119.911	160.992	158.858	157.555	169.18	148.097	158.303	125.566	191.824	226.359
P14324	Farnesyl pyrophosphate synthase	FDPS	48.2755	9.2228e-05	0.936373	169.571	110.167	209.689	244.492	229.599	169.478	194.638	105.573	170.854	147.09	179.682	242.985
P14373	Zinc finger protein RFP	TRIM27	58.4897	0.00133486	0.841214		58.7083		27.5421		33.7203		49.614	61.9419	56.5526
P14384	Carboxypeptidase M	CPM	50.5138	7.51716e-05	0.947127	238.844	223.485	303.242	236.159	213.694	144.638	219.697	279.197	253.676	156.924	180.197	108.228
P14406	Cytochrome c oxidase subunit 7A2, mitochondrial	COX7A2	9.39598	0.000171156	0.910443	2289.48	3124.05	2475.48	2402.19	2023.82	1961.45	1444.04	1740.99	1075.84	1176.2	1715.39	1379.6
P14415	Sodium/potassium-transporting ATPase subunit beta-2	ATP1B2	33.3671	0.00139292	0.830582	58.1846	45.9552		35.3875				19.9601	22.9735	30.0663		16.8372
P14543	Nidogen-1	NID1	136.377	5.53335e-06	0.974734	408.793	570.638	512.644	512.343	422.728	484.569	356.525	368.388	292.91	395.595	402.53	300.193
P14550	Aldo-keto reductase family 1 member A1	AKR1A1	36.573	7.20583e-05	0.94991	186.071	177.005	215.41	262.006	207.126	266.531	242.989	159.847	158.747	55.21	240.194	380.513
P14555	Phospholipase A2, membrane associated	PLA2G2A	16.0827	0.000143333	0.924305	34.9854	13.2734	17.8788		9.60544	27.8202	21.2477	22.5459	10.1008	10.4106	27.3914	9.09709
P14618	Pyruvate kinase PKM	PKM	57.9369	6.72261e-05	0.962207	393.167	301.729	409.089	372.834	354.238	361.612	425.759	351.907	350.314	312.598	587.746	515.017
P14621	Acylphosphatase-2	ACYP2	11.1396	0.00131185	0.850196	125.169	81.5358	147.979	175.6		162.067	269.104	103.112	111.312	93.8357	94.3487	187.858
P14625	Endoplasmin	HSP90B1	92.4689	1.42997e-06	0.977891	719.073	632.161	790.543	643.54	1142.7	880.196	708.351	813.659	969.551	886.195	946.618	849.264
P14649	Myosin light chain 6B	MYL6B	22.764	9.56106e-05	0.935332	560.235	580.385	634.892	525.493	483.275	518.074	497.287	481.037	466.498	510.086	409.48	371.174
P14678	Small nuclear ribonucleoprotein-associated proteins B and B'	SNRPB	24.6101	6.44213e-05	0.963086	496.597	440.616	398.805	418.078	303.36	352.613	347.296	362.135	362.776	389.703	350.914	416.499
P14735	Insulin-degrading enzyme	IDE	117.968	0.00014202	0.924743	93.0907	86.0952	102.356	110.506	129.649	104.994	96.5767	100.836	103.347	103.57	131.188	109.959
P14770	Platelet glycoprotein IX	GP9	19.0461	0.0001096	0.932049	242.266	170.055	181.045	106.986	171.791	162.147	166.297	136.782	83.3228	109.354	208.675	137.157
P14778	Interleukin-1 receptor type 1	IL1R1	65.4025	0.000227215	0.897649	35.8396	40.6032	19.7728	26.8166		47.3418	45.2079	45.4081	32.7722	88.3734	46.7575	32.6707
P14780	Matrix metalloproteinase-9	MMP9	78.4582	0.000140153	0.925215	80.6563	35.523	90.3131	20.6966	37.4449	18.1357	70.5675	31.9593	26.7441	25.3599	31.6451	11.5013
P14854	Cytochrome c oxidase subunit 6B1	COX6B1	10.1924	7.09264e-05	0.951493	2277.4	2899.39	2530.93	2032.57	2805.73	2613.2	1943.09	2587.15	2264.66	2336.68	1971.38	2556.14
P14859	POU domain, class 2, transcription factor 1	POU2F1	76.4716	6.63977e-05	0.962593	239.615	70.6229		179.221	70.5485	89.4143	133.468	102.118	105.929	133.306	180.61	142.896
P14866	Heterogeneous nuclear ribonucleoprotein L	HNRNPL	64.1328	7.07872e-05	0.95641	305.758	247.648	201.997	325.24	301.504	295.76	280.844	296.237	319.607	374.946	350.305	306.073
P14868	Aspartate--tRNA ligase, cytoplasmic	DARS1	57.1362	8.44042e-07	0.979057	219.041	217.848	207.692	241.964	233.265	222.905	206.259	231.655	219.419	226.94	279.194	245.543
P14902	Indoleamine 2,3-dioxygenase 1	IDO1	45.3263	0.000177576	0.908208	152.409	138.545	214.04	315.139	320.41	191.641	194.073	173.719	164.239	76.639	146.776	308.548
P14921	Protein C-ets-1	ETS1	50.4079	0.00159946	0.823099		30.0349		31.9936	22.5871	20.656	26.6377		13.6769	14.6915
P14923	Junction plakoglobin	JUP	81.7447	3.68086e-05	0.967877	354.054	267.564	269.433	244.945	213.784	221.121	329.733	322.004	335.877	326.085	248.461	272.424
P14927	Cytochrome b-c1 complex subunit 7	UQCRB	13.5305	0.00010131	0.93386	248.245	266.522	250.338	246.117	249.697	231.902	265.145	237.357	229.021	262.812	162.899	188.894
P15056	Serine/threonine-protein kinase B-raf	BRAF	84.4369	0.000941791	0.867603			148.51	46.1966		60.3155	157.747	62.3046	68.703	96.4535	82.9603
P15090	Fatty acid-binding protein, adipocyte	FABP4	14.7189	7.07872e-05	0.960281	514.412	72.9713	558.678	824.595	221.805	406.115	278.725	459.712	388.813	267.005	397.12	575.089
P15104	Glutamine synthetase	GLUL	42.0644	9.3619e-05	0.936009	91.095	107.088	126.476	79.9444	109.773	211.462	483.53	145.239	80.6141	54.5032	141.399	123.371
P15121	Aldo-keto reductase family 1 member B1	AKR1B1	35.8534	6.18359e-05	0.963653	399.02	570.888	724.74	707.996	574.036	648.069	675.424	522.044	456.497	258.961	559.754	908.243
P15144	Aminopeptidase N	ANPEP	109.54	7.07872e-05	0.952474	316.254	379.259	299.26	269.708	235.506	392.99	425.959	235.993	148.544	181.283	196.449	219.672
P15151	Poliovirus receptor	PVR	45.3026	0.000269164	0.893364	72.7709	77.5254	39.647	43.8397	35.5261	35.4643	104.082	72.4	49.1591	69.4484	137.976	79.7233
P15153	Ras-related C3 botulinum toxin substrate 2	RAC2	21.4288	0.000246069	0.895453	156.451	102.726	153.564	64.8596	92.0099	62.9649	140.506	71.5971	30.2605	46.7758	121.649	53.9211
P15169	Carboxypeptidase N catalytic chain	CPN1	52.2862	0.000208218	0.900352	61.2174	59.8564	72.6973	64.3344	62.5066	47.7339	72.7877	72.5518	45.4545	43.0322	98.1351	52.1791
P15170	Eukaryotic peptide chain release factor GTP-binding subunit ERF3A	GSPT1	55.7559	7.10246e-05	0.951327	103.59	102.603	119.775	161.032	146.15	140.348	133.953	122.879	122.843	128.037	145.785	148.686
P15260	Interferon gamma receptor 1	IFNGR1	54.4046	0.000170071	0.910853	47.8052	45.4887	39.5852	53.2856	42.5024	50.78	49.5265	59.5999	64.9984	66.4676	33.4124	48.9514
P15289	Arylsulfatase A	ARSA	53.5882	0.000153797	0.920196	130.778	179.721	124.497	221.512	161.225	101.08	102.785	138.955	125.34	149.379	113.278	318.734
P15291	Beta-1,4-galactosyltransferase 1	B4GALT1	43.9203	0.000440525	0.884162	171.636	147.146	220.62	177.467	178.53	223.415	159.334	213.788	174.027	197.743	144.079	124.551
P15309	Prostatic acid phosphatase	ACP3	44.5661	0.00119221	0.858505	74.8499	41.6927	77.9062	75.1847	124.285	98.692	74.3178	100.897	48.5729	38.8353	47.0975	47.4456
P15311	Ezrin	EZR	69.4128	7.07872e-05	0.958852	569.952	441.515	1004.17	615.117	567.691	629.935	569.892	698.093	810.392	794.142	704.534	599.414
P15313	V-type proton ATPase subunit B, kidney isoform	ATP6V1B1	56.833	3.60853e-05	0.967976	257.318	230.055	315.507	255.271	353.642	238.487	245.064	276.833	245.096	246.39	311.553	246.31
P15328	Folate receptor alpha	FOLR1	29.8191	7.5896e-05	0.946236	100.506	58.7304	67.5134	51.1071	49.507	83.4509	34.158	80.0565	91.7495	51.6528	79.8565	109.295
P15374	Ubiquitin carboxyl-terminal hydrolase isozyme L3	UCHL3	26.1826	9.01376e-05	0.937087	143.057	106.057	135.57	144.249	156.153	138.983	160.964	116.16	138.822	87.0617	153.98	173.048
P15428	15-hydroxyprostaglandin dehydrogenase [NAD(+)]	HPGD	28.9773	9.09727e-05	0.936805	728.43	338.784	612.716	269.114	423.333	333.967	471.964	301.775	323.675	513.488	476.245	710.506
P15498	Proto-oncogene vav	VAV1	98.3142	0.000249028	0.89515	76.6001	58.4553	77.0058	101.791	80.0714	82.6316	62.0649	54.4007	50.5767	49.9664	64.3903	77.7464
P15502	Elastin	ELN	68.3975	0.00224318	0.808264		33.626						12.6054		17.6326		32.304
P15509	Granulocyte-macrophage colony-stimulating factor receptor subunit alpha	CSF2RA	46.2066	0.0003122	0.890319	168.591	166.385	199.447	149.813	175.641	145.278	214.011	260.222	242.755	198.829	168.441	218.937
P15529	Membrane cofactor protein	CD46	43.7473	7.09636e-05	0.951459	625.239	684.075	768.202	458.092	490.051	634.436	368.991	888.309	656.694	554.825	826.396	550.554
P15531	Nucleoside diphosphate kinase A	NME1	17.1487	7.07872e-05	0.959948	200.177	154.225	212.779	261.438	259.363	191.032	246.798	164.441	179.84	218.029	263.356	201.459
P15559	NAD(P)H dehydrogenase [quinone] 1	NQO1	30.8676	0.00014202	0.924767	66.291	19.4133		253.943	100.545	125.457	75.2167	30.7152	48.1144	109.443		104.135
P15586	N-acetylglucosamine-6-sulfatase	GNS	62.0821	0.000147583	0.922894	153.465	173.304	142.533	169.572	163.182	169.934	146.123	132.973	142.006	104.531	139.748	205.701
P15692	Vascular endothelial growth factor A	VEGFA	27.0424	0.00971216	0.773198						19.9751
P15735	Phosphorylase b kinase gamma catalytic chain, liver/testis isoform	PHKG2	46.4422	0.000976594	0.866403	62.9128	60.8663	46.9503	46.9391	37.5184	39.5385	63.1155	54.1468	46.7048	36.8915	35.7253	49.2265
P15848	Arylsulfatase B	ARSB	59.6872	0.00145283	0.827833	82.7843	82.5832	99.2976	110.363	146.962	137.749	85.1791	98.0684	90.7678	87.8481	83.6897	86.91
P15880	40S ribosomal protein S2	RPS2	31.3244	1.38475e-05	0.972056	300.573	294.3	410.029	274.821	283.531	322.458	249.669	314.999	343.052	312.388	244.245	324.656
P15924	Desmoplakin	DSP	331.774	3.75963e-05	0.967688	278.005	192.652	206.549	172.216	131.088	119.744	233.133	170.833	228.047	221.171	168.432	201.264
P15927	Replication protein A 32 kDa subunit	RPA2	29.2468	7.62063e-05	0.946098	215.285	225.072	214.413	248.483	261.017	264.783	298.264	233.591	270.383	241.167	237.562	279.456
P15941	Mucin-1	MUC1	122.102	7.52784e-05	0.946616	88.1465	47.1481	164.879		17.9059	32.6248	99.5008	69.2697	101.816	111.804	38.2257	8.89963
P15954	Cytochrome c oxidase subunit 7C, mitochondrial	COX7C	7.2455	0.000159081	0.915959	422.975	431.744	519.186	454.429	513.648	326.4	395.63	399.975	301.775	389.943	339.239	288.953
P16035	Metalloproteinase inhibitor 2	TIMP2	24.3992	0.000136814	0.9261	86.7303	77.2611	80.6208	69.8153	70.5397	87.7566	91.5621	59.4073	83.1237	61.6985	102.33	81.6829
P16050	Polyunsaturated fatty acid lipoxygenase ALOX15	ALOX15	74.8044	7.29316e-05	0.948392				46.3575							52.3154
P16066	Atrial natriuretic peptide receptor 1	NPR1	118.919	0.0012631	0.854651	47.556	30.7181	24.8305	58.3883	47.0371	46.6191	47.1983	40.941	57.9705	44.9391		23.2463
P16070	CD44 antigen	CD44	81.5376	7.07872e-05	0.959133	245.66	266.234	197.889	239.785	297.032	273.861	393.767	335.617	316.633	336.003	386.096	259.717
P16083	Ribosyldihydronicotinamide dehydrogenase [quinone]	NQO2	25.9186	0.00010748	0.932574	183.193		172.504	103.804	202.515	175.097	131.518	39.425	95.2968	103.783	81.802	167.729
P16109	P-selectin	SELP	90.8339	0.0003938	0.886065	67.3712	63.3281	59.156	46.7387	26.8368	56.7786	33.2216	46.8745	39.1537	34.9555	99.8288	68.2442
P16112	Aggrecan core protein	ACAN	261.329	0.00215979	0.809587					34.8713	91.8116
P16144	Integrin beta-4	ITGB4	202.167	7.07872e-05	0.955572	274.496	306.904	326.264	207.961	267.381	184.945	254.945	335.568	262.545	250.081	217.87	253.012
P16152	Carbonyl reductase [NADPH] 1	CBR1	30.3749	6.57611e-05	0.962723	566.989	799.442	1442.12	1105.81	568.846	724.579	964.153	456.259	494.583	516.764	464.863	594.298
P16157	Ankyrin-1	ANK1	206.265	7.07872e-05	0.955995	463.762	247.504	337.937	215.962	450.921	208.993	310.409	311.732	272.56	437.829	273.069	81.0126
P16219	Short-chain specific acyl-CoA dehydrogenase, mitochondrial	ACADS	44.2972	1.4977e-05	0.971776	391.914	615.06	427.848	569.868	427.026	533.029	409.189	500.66	466.704	490.798	361.483	472.639
P16220	Cyclic AMP-responsive element-binding protein 1	CREB1	35.1363	0.000105256	0.933032	106.547	12.3675	31.7587	99.3775	91.3153	65.2766	48.8245	46.6674	48.8098	83.7368	48.4415	77.5802
P16234	Platelet-derived growth factor receptor alpha	PDGFRA	122.67	0.00122296	0.857066		39.6812	42.736	32.4598		51.6993	58.2951	39.0526	24.0078	21.6677
P16260	Graves disease carrier protein	SLC25A16	36.2236	0.000156979	0.917869	76.734	84.9475	82.1268	79.3127	86.1313	65.7336	72.9937	69.3203	77.6165	90.2215	65.7819	74.0925
P16278	Beta-galactosidase	GLB1	76.0749	7.79044e-05	0.944708	169.464	170.699	166.398	156.625	200.636	193.743	148.887	177.245	168.634	136.687	170.068	133.303
P16284	Platelet endothelial cell adhesion molecule	PECAM1	82.5222	7.07872e-05	0.958662	393.27	356.834	355.127	425.6	490.67	409.439	324.193	417.469	370.601	402.589	295.693	332.555
P16298	Serine/threonine-protein phosphatase 2B catalytic subunit beta isoform	PPP3CB	59.0243	0.000815877	0.871731	46.2005	98.0199	47.3209	51.6189	28.3129	27.6372		46.0326	31.8858	31.9845	29.998	32.6415
P16333	Cytoplasmic protein NCK1	NCK1	42.8645	0.000241311	0.89594	146.579	128.552	140.339	172.054	153.327	133.452	158.984	125	130.606	120.579	132.894	150.432
P16383	Intron Large complex component GCFC2	GCFC2	89.3846	0.000844416	0.870788	40.7613	32.7328	67.1918	40.3379		50.1304	43.4044	25.1875	47.0629	31.8766	36.1729	41.7625
P16401	Histone H1.5	H1-5	22.5802	7.07872e-05	0.95734	3975.49	4229.23	5342.77	3899.43	3824.57	3183.68	2848.97	3523.71	2057.25	4044.81	2462.34	2780.15
P16402	Histone H1.3	H1-3	22.3499	0.00117318	0.859239	5548.38	5573.68	6312.38	2694.46	3067.11	2807.21	3777.37	5307.35	2219.23	2593.92	2340.69	2275.74
P16403	Histone H1.2	H1-2	21.3648	1.15282e-06	0.978393	2143.17	1784.49	2628.47	2103.85	1658.61	1071.36	1918.87	1455.17	663.294	917.402	977.996	1051.19
P16422	Epithelial cell adhesion molecule	EPCAM	34.9323	0.00133486	0.841075	43.4045	43.0225	32.4053		36.6419	24.9105		39.8184
P16435	NADPH--cytochrome P450 reductase	POR	76.6897	7.07498e-05	0.961077	374.867	465.337	462.132	318.299	364.39	368.73	307.509	446.198	450.632	380.975	272.886	357.771
P16452	Protein 4.2	EPB42	77.0091	2.089e-05	0.970494	832.446	434.217	651.693	409.918	842.305	410.322	699.463	605.061	535.146	804.673	478.514	145.125
P16455	Methylated-DNA--protein-cysteine methyltransferase	MGMT	21.646	0.000286905	0.892043	47.078	77.9931	37.9341	12.8808		28.7851	20.8819	26.3372	23.0295			22.7255
P16471	Prolactin receptor	PRLR	69.5056	0.00135461	0.83376	53.2081	45.1373				32.9218	100.983	73.4371		64.2387	36.4378
P16591	Tyrosine-protein kinase Fer	FER	94.6379	0.00729098	0.782057	18.92		28.0053	27.9547	39.5528	29.3944	40.0708		22.1843	27.5014	34.9689	26.9687
P16615	Sarcoplasmic/endoplasmic reticulum calcium ATPase 2	ATP2A2	114.757	4.75404e-06	0.975086	213.872	213.647	230.69	184.471	208.38	195.51	200.658	177.49	205.874	181.383	147.977	189.596
P16671	Platelet glycoprotein 4	CD36	53.0534	7.56746e-05	0.946432	310.688	181.811	325.256	305.568	256.09	318.329	214.258	382.798	301.534	314.54	224.661	197.403
P16885	1-phosphatidylinositol 4,5-bisphosphate phosphodiesterase gamma-2	PLCG2	147.87	0.000186056	0.905203	77.1742	55.7553	67.7355	71.8854	69.7535	77.1845	63.8687	56.3015	66.0224	44.4309	66.8632	74.7897
P16930	Fumarylacetoacetase	FAH	46.3743	0.000116198	0.930597	133.03	91.9166	136.769	157.947	156.475	111.975	152.575	96.0301	126.544	86.5445	146.552	118.069
P16949	Stathmin	STMN1	17.3025	8.14051e-05	0.941598	143.76	147.815	128.445	263.49	229.626	213.604	191.668	146.501	185.312	126.861	174.233	303.728
P16989	Y-box-binding protein 3	YBX3	40.09	7.07872e-05	0.951612	139.855	123.81	75.2005	142.805	162.147	106.467	172.546	107.3	168.909	223.009	110.643	155.03
P17010	Zinc finger X-chromosomal protein	ZFX	90.5218	0.00015784	0.917374	83.7728	89.1015	89.2321	83.8421	40.094	51.8515	85.7289	50.4224	53.4038	83.6217	60.6463	60.0451
P17026	Zinc finger protein 22	ZNF22	25.9154	0.000324942	0.889536	58.4074	59.5989	47.6124	38.2829	42.6151	50.2	43.5822	43.1716	48.392	37.5026	40.4689	38.9208
P17028	Zinc finger protein 24	ZNF24	42.1554	0.000162161	0.914414	75.1938	29.2032		80.675	28.4545	49.0776	42.5975	49.0986	59.2492	35.1591	52.7418	50.6394
P17050	Alpha-N-acetylgalactosaminidase	NAGA	46.5646	0.000115339	0.930804	95.1868	111.18	120.274	82.3518	127.236	105.281	106.619	97.9721	99.6665	85.4675	83.9812	91.5036
P17096	High mobility group protein HMG-I/HMG-Y	HMGA1	11.676	7.23262e-05	0.949384	177.251	163.499	185.664	178.992	91.3382	139.431	194.571	136.893	87.0141	124.982	99.7669	108.89
P17097	Zinc finger protein 7	ZNF7	77.8869	0.0025877	0.804645				7.80206								8.07868
P17152	Transmembrane protein 11, mitochondrial	TMEM11	21.5408	9.45913e-05	0.93565	136.861	156.384	94.4818	164.967	160.545	126.082	128.509	136.675	105.827	181.686	99.2418	117.067
P17174	Aspartate aminotransferase, cytoplasmic	GOT1	46.2475	9.13285e-05	0.936684	237.718	248.713	304.421	303.555	337.793	274.201	283.514	298.064	286.225	226.594	387.325	298.162
P17213	Bactericidal permeability-increasing protein	BPI	53.8997	0.000161413	0.914828	399.215	70.616	104.691	92.465	118.659	84.2418	329.504	86.1193	120.583	101.333	92.3254
P17252	Protein kinase C alpha type	PRKCA	76.7499	0.000135007	0.926571	77.9094	97.8394	61.1288	79.7951	76.0475	119.788	108.947	71.397	53.9462	67.7039	64.0594	48.542
P17275	Transcription factor jun-B	JUNB	35.8793	0.000929018	0.868051	117.137	72.5224	10.4533	49.425	37.8491		58.0825	39.3324	69.2313	88.3233	49.293	43.6061
P17301	Integrin alpha-2	ITGA2	129.295	7.66949e-05	0.94573	136.118	123.888	138.844	124.885	141.282	95.0025	81.9109	103.325	116.429	139.878	102.835	79.7625
P17302	Gap junction alpha-1 protein	GJA1	43.0084	7.71637e-05	0.94517	49.6394	87.0316	41.4047	51.3204	64.046	56.1263	91.2776	55.6993	47.0493	48.5227	48.1749	55.2486
P17342	Atrial natriuretic peptide receptor 3	NPR3	59.8078	9.37346e-05	0.935899	14.7197						22.22	7.99474
P17480	Nucleolar transcription factor 1	UBTF	89.4059	7.52784e-05	0.946999	158.725	165.018	147.583	166.986	134.096	163.614	174.815	165.329	146.272	156.997	113.156	155.444
P17535	Transcription factor jun-D	JUND	35.1739	7.07872e-05	0.952687	171.135	136.264	89.9066	143.642	52.6659	80.8244	138.2	103.247	118.794	126.128	156.703	130.746
P17544	Cyclic AMP-dependent transcription factor ATF-7	ATF7	51.7568	0.00244	0.805975	20.9209	18.6601	25.3755	36.7165	16.3046			23.9562		12.9596		22.1961
P17568	NADH dehydrogenase [ubiquinone] 1 beta subcomplex subunit 7	NDUFB7	16.4019	8.50766e-05	0.939338	110.941	126.47	119.467	107.55	135.079	101.048	105.058	117.029	97.9994	93.3921	85.2944	106.154
P17612	cAMP-dependent protein kinase catalytic subunit alpha	PRKACA	40.5897	0.000240207	0.896078	140.99	113.504	99.0098	160.528	164.228	170.475	125.088	92.6454	116.124	108.224	151.556	105.005
P17655	Calpain-2 catalytic subunit	CAPN2	79.9954	7.10441e-05	0.95129	196.345	256.529	179.546	221.753	246.837	266.273	227.802	152.878	148.961	124.617	261.18	121.793
P17661	Desmin	DES	53.5358	3.74854e-05	0.96777	683.093	1130.31	452.447	619.928	408.316	1647.44	940.814	464.947	403.068	417.633	475.751	539.01
P17676	CCAAT/enhancer-binding protein beta	CEBPB	36.1058	7.07872e-05	0.953762	532.636	411.907	347.048	350.062	108.006	230.427	259.139	301.059	280.997	345.46	309.73	339.919
P17677	Neuromodulin	GAP43	24.8027	0.001371	0.832202					55.117	41.3948						13.1457
P17693	HLA class I histocompatibility antigen, alpha chain G	HLA-G	38.2241	7.44839e-05	0.947376	216.802	67.4315	81.1478	33.3694	44.411		77.4306	61.1859	124.917		252.494	188.704
P17706	Tyrosine-protein phosphatase non-receptor type 2	PTPN2	48.4733	0.000312051	0.890332	123.623	159.586	119.76	143.586	121.248	128.212	127.038	133.375	122.413	123.626	87.221	129.493
P17812	CTP synthase 1	CTPS1	66.6903	9.90501e-05	0.934449	154.354	132.348	180.874	116.046	135.36	177.097	125.581	95.9694	90.828	94.6999	144.516	127.111
P17813	Endoglin	ENG	70.5781	7.07872e-05	0.956185	315.099	296.435	775.483	296.902	340.183	643.114	291.86	426.404	641.357	474.846	482.201	348.894
P17844	Probable ATP-dependent RNA helicase DDX5	DDX5	69.1481	8.30353e-05	0.940349	172.082	126.261	94.1514	146.345	123.674	112.658	121.619	90.888	155.641	141.819	116.956	142.055
P17858	ATP-dependent 6-phosphofructokinase, liver type	PFKL	85.0184	5.46902e-05	0.965043	471.772	360.481	496.756	430.82	370.121	374.676	542.134	501.057	477.327	594.802	614.201	385.215
P17900	Ganglioside GM2 activator	GM2A	20.8384	0.000179718	0.907421	124.04	165.491	213.893	122.392	105.71	101.242	122.583	120.243	165.034	51.8227	134.262	160.995
P17927	Complement receptor type 1	CR1	223.663	0.00948858	0.773966	41.6473	11.8733		22.8138						62.7986
P17931	Galectin-3	LGALS3	26.1523	8.30353e-05	0.940336	1131.34	1224.9	1245.66	925.999	1413.26	1333.02	2725.04	963.543	1120.05	1012.86	1719.76	1147.25
P17936	Insulin-like growth factor-binding protein 3	IGFBP3	31.6742	4.3905e-05	0.966799	167.134	383.13	169.323	114.467	91.9989	124.9	218.606	103.974	91.8842	58.3565	288.313	152.912
P17948	Vascular endothelial growth factor receptor 1	FLT1	150.769	4.92232e-05	0.966013	201.062	148.157	379.9	116.729	136.379	104.329	246.409	147.284	152.24	139.043	529.927	245.185
P17980	26S proteasome regulatory subunit 6A	PSMC3	49.2035	2.61918e-06	0.976617	235.346	270.971	259.614	276.416	285.373	293.246	283.594	281.703	289.962	329.834	320.325	262.323
P17987	T-complex protein 1 subunit alpha	TCP1	60.3436	7.07872e-05	0.955771	362.463	335.154	348.489	333.976	335.174	325.576	308.558	352.983	343.022	372.223	338.624	352.931
P18031	Tyrosine-protein phosphatase non-receptor type 1	PTPN1	49.9668	7.07872e-05	0.95168	236.262	254.876	259.041	247.568	258.719	282.331	199.163	270.54	274.6	198.656	216.983	323.051
P18054	Polyunsaturated fatty acid lipoxygenase ALOX12	ALOX12	75.6941	0.00129879	0.851622	25.2771	24.4349	13.6749		14.9668	16.0429	34.1501			6.11924		16.5193
P18065	Insulin-like growth factor-binding protein 2	IGFBP2	34.8141	9.97782e-05	0.934256	71.3352	53.2786	82.1938		50.7028	59.6313	82.7648	71.319	39.8812		131.392	42.7081
P18074	General transcription and DNA repair factor IIH helicase subunit XPD	ERCC2	86.9092	0.00226628	0.807957	44.4304	49.5705		45.6634	37.9703	50.2045	51.473	36.5115	61.4247	54.9878	68.1542	42.6329
P18077	60S ribosomal protein L35a	RPL35A	12.5377	2.6493e-05	0.96946	132.127	158.404	249.272	162.4	180.816	166.93	155.81	156.702	139.65	172.259	118.695	157.039
P18084	Integrin beta-5	ITGB5	88.0542	0.000160064	0.915509	71.0589	107.662	74.4852	77.3258	85.7229	82.6275	96.7024	99.7899	76.8132	82.4241	79.704	90.2914
P18085	ADP-ribosylation factor 4	ARF4	20.5108	6.13973e-05	0.963751	762.35	573.477	1208.53	837.818	817.734	823.67	857.054	607.858	720.091	696.372	601.511	745.893
P18124	60S ribosomal protein L7	RPL7	29.2258	2.26364e-05	0.970187	339.408	350.707	452.928	351.904	422.23	361.171	345.412	356.277	381.454	401.158	278.903	332.71
P18206	Vinculin	VCL	123.799	1.9476e-05	0.970749	640.242	749.535	512.548	719.576	613.476	864.606	723.296	545.479	528.739	440.261	948.667	674.007
P18428	Lipopolysaccharide-binding protein	LBP	53.3836	7.71161e-05	0.945234	304.346	190.566	170.825	155.552	146.989	172.441	456.904	191.763	141.482	372.693	309.245	134.914
P18433	Receptor-type tyrosine-protein phosphatase alpha	PTPRA	90.719	5.81847e-05	0.964481	105.791	120.575	100.249	120.169	116.194	140.774	111.637	126.335	120.764	126.87	107.675	104.891
P18440	Arylamine N-acetyltransferase 1	NAT1	33.8987	0.000781386	0.872781	60.7651		20.4686	89.0559	82.9734	55.3438	60.47	59.1791	49.3886	66.4733	70.5785	60.3218
P18564	Integrin beta-6	ITGB6	85.936	0.000155969	0.918737	78.588	66.6215	154.604	40.7599	63.6931	49.6936	49.507	59.9611	39.8923	31.3607	63.1264	67.437
P18577	Blood group Rh(CE) polypeptide	RHCE	45.5602	0.000187223	0.904835	555.622	271.406	428.484	229.961	322.444	160.257	339.681	311.269	176.582	275.269	267.78	74.8838
P18583	Protein SON	SON	263.83	0.000115339	0.930791	151.418	108.127	76.5981	130.01	81.1892	67.6591	83.2816	65.8473	66.2353	105.749	102.747	112.823
P18615	Negative elongation factor E	NELFE	43.2398	0.000113925	0.93111	122.347	100.33	61.9746	115.21	78.3742	74.8089	107.347	99.958	89.5117	109.315	115.308	116.585
P18621	60S ribosomal protein L17	RPL17	21.397	7.07872e-05	0.954129	598.281	565.922	805.214	620.9	690.604	661.34	709.2	582.307	732.822	710.26	371.248	582.804
P18669	Phosphoglycerate mutase 1	PGAM1	28.8039	7.07872e-05	0.958638	433.62	419.661	491.262	677.404	579.355	567	716.613	466.193	469.494	407.38	602.968	775.271
P18754	Regulator of chromosome condensation	RCC1	44.969	6.13763e-05	0.963851	233.795	251.961	394.939	215.12	244.093	228.63	233.433	264.079	237.83	257.097	220.998	213.789
P18827	Syndecan-1	SDC1	32.4616	9.52584e-05	0.935471	94.2706	128.612	147.699	97.0716	59.0562	72.9667	113.569	114.589	76.104	146.918	77.2662	43.0632
P18847	Cyclic AMP-dependent transcription factor ATF-3	ATF3	20.5756	0.000847591	0.870682	71.943	55.823	47.4977	55.468		43.7645	62.6911	39.688	61.8254	58.0159	55.5616	72.5021
P18850	Cyclic AMP-dependent transcription factor ATF-6 alpha	ATF6	74.5846	0.00134553	0.835364	10.7477	15.0914		51.2771			12.8054	17.9769	15.6348	16.3336	12.7855
P18858	DNA ligase 1	LIG1	101.736	0.000410288	0.885354	53.2848	43.0667	55.7788	61.5067	64.773	50.5513	52.277	56.2667	50.9652	61.4207	78.9857	94.0345
P18859	ATP synthase-coupling factor 6, mitochondrial	ATP5PF	12.5875	7.23262e-05	0.949507	356.904	291.205	398.316	392.954	361.783	334.394	294.66	358.108	349.898	350.629	279.406	283.826
P18887	DNA repair protein XRCC1	XRCC1	69.4765	9.28485e-05	0.936197	80.7744	78.0515	65.1778	75.638	52.8404	64.995	52.0044	90.8528	79.1732	68.9618	82.1735	96.3089
P19012	Keratin, type I cytoskeletal 15	KRT15	49.2117	0.000141912	0.924815	7821.16	7987.5	11726	5044.61	7393.78	6237.36	8865.05	6864.31	8417.54	9254.57	9075.86	5344.04
P19021	Peptidyl-glycine alpha-amidating monooxygenase	PAM	108.332	0.00135461	0.833834	48.594	66.1423	62.5802	62.0677	57.5989	55.1948	79.0164	59.4017	66.7424	69.21	52.0875	61.0626
P19086	Guanine nucleotide-binding protein G(z) subunit alpha	GNAZ	40.9237	0.00539947	0.789717		256.578			214.436	184.952	267.443	244.622	149.878			223.762
P19174	1-phosphatidylinositol 4,5-bisphosphate phosphodiesterase gamma-1	PLCG1	148.532	0.000884991	0.869497	113.62	103.194	100.353	135.153	105.876	115.12	93.5457	102.079	58.706	56.4452	79.1473	124.823
P19256	Lymphocyte function-associated antigen 3	CD58	28.1474	0.000784754	0.87268	131.878	101.311	128.169	101.328	106.739	95.178	85.889	110.289	102.876	99.4135	99.3743	88.1864
P19320	Vascular cell adhesion protein 1	VCAM1	81.2762	0.000198305	0.902169	82.7995	97.4691	47.1401	92.8664	93.1679	65.1626	89.3574	52.0517	52.1996	81.5587	78.5812	76.3349
P19338	Nucleolin	NCL	76.6144	3.89982e-06	0.975595	143.667	140.297	152.372	204.474	166.035	172.784	185.153	171.603	182.792	196.097	169.079	167.394
P19367	Hexokinase-1	HK1	102.486	3.56655e-05	0.968052	450.806	394.219	435.958	451.976	413.548	452.238	482.328	492.155	430.134	463.087	388.702	424.764
P19387	DNA-directed RNA polymerase II subunit RPB3	POLR2C	31.4412	0.000140153	0.925225	180.162	172.091	204.235	158.242	164.555	165.795	163.803	160.457	149.694	168.62	162.929	163.496
P19388	DNA-directed RNA polymerases I, II, and III subunit RPABC1	POLR2E	24.5512	0.000209858	0.900056	128.001	112.605	168.44	138.954	150.108	111.735	147.839	110.487	130.914	120.627	135.813	103.284
P19404	NADH dehydrogenase [ubiquinone] flavoprotein 2, mitochondrial	NDUFV2	27.3915	7.88662e-05	0.943984	710.075	661.959	931.651	684.805	803.789	700.989	750.086	695.698	663.268	678.344	531.101	596.959
P19438	Tumor necrosis factor receptor superfamily member 1A	TNFRSF1A	50.4949	0.00276454	0.803325	6.9233					7.92762			10.1902			4.7843
P19440	Glutathione hydrolase 1 proenzyme	GGT1	61.4102	0.0013182	0.849299	142.985	171.722	161.761	150.249	284.53	159.801	172.421	125.13	406.532	131.237	274.714	190.447
P19447	General transcription and DNA repair factor IIH helicase subunit XPB	ERCC3	89.2777	0.00108589	0.86266	80.6947	16.6128	15.2359	14.4887	22.2634	52.7101		34.1749			50.0431	31.6095
P19474	E3 ubiquitin-protein ligase TRIM21	TRIM21	54.1697	0.000142148	0.924692	176.91	162.213	212.571	179.376	237.575	159.653	185.61	176.13	185.081	203.912	195.277	223.671
P19484	Transcription factor EB	TFEB	52.8648	0.001326	0.846943	95.0167	15.1599		69.2407	65.529	54.6904		67.971	58.0703	63.5448	53.8358	69.5335
P19525	Interferon-induced, double-stranded RNA-activated protein kinase	EIF2AK2	62.0943	0.00013209	0.927234	155.049	120.979	132.568	177.74	177.371	179.314	181.354	137.119	176.382	159.316	198.264	212.586
P19623	Spermidine synthase	SRM	33.8247	7.07872e-05	0.955974	172.316	158.784	182.395	269.034	281.656	300.304	257.113	131.592	175.766	140.7	245.722	320.079
P19634	Sodium/hydrogen exchanger 1	SLC9A1	90.763	0.00013794	0.925828	192.191	155.923	125.068	158.153	134.742	173.546	168.795	191.573	208.386	260.999	184.619	168.106
P19652	Alpha-1-acid glycoprotein 2	ORM2	23.6026	0.000148573	0.922329	199.696	132.179	99.3607	136.319	128.144	205.346	197.937	180.145	84.6758	124.875	265.784	168.159
P19784	Casein kinase II subunit alpha'	CSNK2A2	41.2132	7.07872e-05	0.955109	168.305	158.664	208.946	203.027	195.483	181.967	191.992	184.893	199.279	227.317	154.416	150.956
P19793	Retinoic acid receptor RXR-alpha	RXRA	50.8113	0.00126123	0.854771	79.1796	54.2176	64.7216	54.8915	44.4652	42.3018	56.8333	50.2926	55.3679	69.9691	73.2301	60.375
P19801	Amiloride-sensitive amine oxidase [copper-containing]	AOC1	85.3776	2.63199e-05	0.969489	484.231	201.298	96.5387	214.035	346.715	40.9315	657.865	281.943	117.669	38.9151	974.979	446.536
P19823	Inter-alpha-trypsin inhibitor heavy chain H2	ITIH2	106.463	7.07498e-05	0.961078	242.206	215.827	213.484	236.47	283.349	215.731	314.459	221.551	161.721	159.626	415.437	245.529
P19827	Inter-alpha-trypsin inhibitor heavy chain H1	ITIH1	101.389	2.35628e-08	0.984606	187.359	174.312	167.104	188.279	194.546	184.706	242.488	170.602	131.978	136.907	331.433	181.946
P19838	Nuclear factor NF-kappa-B p105 subunit	NFKB1	105.356	0.000108091	0.932457	76.9145	68.7515	63.7907	69.3565	59.2244	62.0811	48.5611	58.1987	60.5774	56.7299	72.1978	74.2586
P19878	Neutrophil cytosol factor 2	NCF2	59.7615	0.000160926	0.915081	66.4048	59.57	85.1424	76.2717	71.8974	78.4329	117.687	60.5493	68.9379	43.7387	82.5195	88.3956
P19971	Thymidine phosphorylase	TYMP	49.9555	7.71161e-05	0.945251	205.493	252.445	769.323	308.447	266.84	330.768	551.615	233.296	237.778	172.348	368.307	378.719
P20020	Plasma membrane calcium-transporting ATPase 1	ATP2B1	134.685	2.77124e-06	0.976461	249.752	217.333	187.932	248.506	192.114	212.372	214.493	235.048	227.9	258.981	176.42	161.305
P20036	HLA class II histocompatibility antigen, DP alpha 1 chain	HLA-DPA1	29.3806	0.000457416	0.883494
P20042	Eukaryotic translation initiation factor 2 subunit 2	EIF2S2	38.3884	7.07872e-05	0.956658	233.981	215.429	244.8	196.397	204.551	239.273	214.417	221.009	244.97	224.291	242.511	252.571
P20062	Transcobalamin-2	TCN2	47.535	0.00488475	0.792104		13.2006			43.0278			21.8807	25.9814	53.6669	12.7112	9.50325
P20073	Annexin A7	ANXA7	52.7392	7.07872e-05	0.954044	294.478	190.473	269.744	213.464	230.694	161.121	180.127	220.211	193.671	183.65	211.261	161.92
P20138	Myeloid cell surface antigen CD33	CD33	39.8252	0.000174778	0.909177	31.6136	63.6133	181.199	61.193	57.8046	39.0226	64.2331	33.5382	52.9896	47.4599	58.3536	30.6651
P20160	Azurocidin	AZU1	26.8856	0.000347137	0.888311	433.476	195.629	555.727	160.305	165.736	226.185	628.821	274.949	217.318	156.541	260.945	93.4601
P20226	TATA-box-binding protein	TBP	37.6981	0.00133327	0.843547	91.3534	54.2418		77.5386		30.038	43.5659	43.3532			57.3194	73.2352
P20231	Tryptase beta-2	TPSB2	30.5151	0.000150202	0.921673	99.4327	109.242		203.886	121.196		356.273	63.2076	159.832	12.5534		67.672
P20290	Transcription factor BTF3	BTF3	22.168	7.88382e-05	0.944182	259.902	322.879	259.561	303.123	353.939	274.807	287.19	289.899	358.332	304.091	267.165	279.824
P20292	Arachidonate 5-lipoxygenase-activating protein	ALOX5AP	18.1571	0.000160064	0.915517	89.7933	223.735	146.876	98.4217	42.2531	160.503	172.433	97.548	37.7331	76.2275	117.931	96.791
P20337	Ras-related protein Rab-3B	RAB3B	24.7579	7.07872e-05	0.958661	166.466	238.042	166.066	235.311	237.721	167.088	219.962	273.273	402.313	356.636	198.622	260.01
P20338	Ras-related protein Rab-4A	RAB4A	24.3896	0.0013865	0.830918	70.751	65.1751		77.4519	8.80886	83.7197		62.1651		58.5386	78.0208	72.1513
P20339	Ras-related protein Rab-5A	RAB5A	23.6587	0.000153826	0.920122	431.177	519.958	422.501	525.248	537.032	482.753	520.071	492.53	492.22	397.429	432.775	542.479
P20340	Ras-related protein Rab-6A	RAB6A	23.5928	0.000112375	0.931447	502.438	480.302	526.33	483.614	455.038	485.529	503.548	556.58	520.665	532.244	498.932	423.821
P20472	Parvalbumin alpha	PVALB	12.0587	0.000252078	0.894844				11.5505	11.255	12.3318						43.42
P20585	DNA mismatch repair protein Msh3	MSH3	127.412	0.00107016	0.863235	77.6271	37.3906	66.4739	73.9053	50.1858	56.8131	60.2348	68.2526	51.7352	74.4757	73.6825	60.9125
P20591	Interferon-induced GTP-binding protein Mx1	MX1	75.5203	7.07872e-05	0.952523	49.6265	63.5378	170.425	109.353	105.029	40.9708	164.388	52.6759	51.723	93.2057	79.0764	96.7307
P20592	Interferon-induced GTP-binding protein Mx2	MX2	82.0887	0.000158715	0.916255	92.3466	69.9332	112.3	67.7924	82.3038	51.0785	119.808	82.2118	65.1882	72.7631	55.7764	73.6467
P20594	Atrial natriuretic peptide receptor 2	NPR2	117.022	0.00483167	0.792361	47.998	35.7043				25.7395
P20618	Proteasome subunit beta type-1	PSMB1	26.4894	7.17522e-05	0.950293	424.013	442.823	369.853	403.684	444.63	406.172	326.484	458.173	418.758	438.515	598.092	411.539
P20645	Cation-dependent mannose-6-phosphate receptor	M6PR	30.9933	0.000149443	0.921981	103.324	80.805	67.9277	85.4471	65.6262	85.019	85.5934	65.5701	80.2983	63.0484	55.9234	82.4688
P20648	Potassium-transporting ATPase alpha chain 1	ATP4A	114.119	0.00300488	0.801739	49.1942	19.1089	35.5843	44.2325					50.3354	71.1579	34.5446
P20674	Cytochrome c oxidase subunit 5A, mitochondrial	COX5A	16.7622	0.000130884	0.927533	288.412	312.875	362.101	292.837	398.943	311.562	328.793	287.996	304.16	320.724	215.602	239.882
P20700	Lamin-B1	LMNB1	66.4083	7.07872e-05	0.960967	383.167	356.115	478.924	369.416	362.476	353.88	371.795	411.309	406.725	412.254	263.981	320.249
P20701	Integrin alpha-L	ITGAL	128.77	0.00148191	0.82671			81.2902				194.312	12.6604			85.9826
P20742	Pregnancy zone protein	PZP	163.863	0.000111099	0.931725	211.061	201.548		70.8515	102.463	84.5471	177.894	124.854	40.8244	34.483	58.1423	406.622
P20774	Mimecan	OGN	33.9222	3.09345e-05	0.968802	299.518	720.426	299.359	231.496	182.905	934.998	317.324	174.748	60.4576	222.708	183.876	154.885
P20810	Calpastatin	CAST	76.5728	4.79125e-06	0.975059	304.725	321.753	243.038	299.931	246.859	308.474	255.007	334.008	331.644	321.279	404.087	323.774
P20827	Ephrin-A1	EFNA1	23.7871	0.00277997	0.803218	18.5842	17.7003							24.2879			18.6129
P20839	Inosine-5'-monophosphate dehydrogenase 1	IMPDH1	55.4058	0.00134528	0.835529	163.113	107.97	86.8125	97.6615	63.5135	101.209	99.1128	62.9061	90.421	74.8709	69.7763	70.4248
P20851	C4b-binding protein beta chain	C4BPB	28.3574	0.000207412	0.900478	75.1985	43.9891	207.397		31.4221	58.2203	75.367	101.377	25.4191	43.5381	88.0539	56.5789
P20908	Collagen alpha-1(V) chain	COL5A1	183.56	0.00172976	0.819553	30.2161			106.474	13.837	10.8189		21.5373		31.0017		23.3061
P20936	Ras GTPase-activating protein 1	RASA1	116.403	4.98221e-05	0.965848	355.402	311.08	477.22	401.975	371.604	390.61	326.05	361.261	421.235	371.865	317.649	403.949
P21127	Cyclin-dependent kinase 11B	CDK11B	92.6199	0.000142184	0.924655	134.96	120.333	97.0633	130.336	72.4081	102.913	118.294	119.872	114.34	135.731	139.799	119.43
P21128	Uridylate-specific endoribonuclease	ENDOU	46.8723	7.07872e-05	0.95885	1305.09	1366.85	1465.97	1173.26	2417.78	1105.37	854.795	1332.15	1310.33	783.666	960.325	1903.93
P21246	Pleiotrophin	PTN	18.942	0.000215916	0.899101	87.8303	64.3126	37.1474					51.3996			254.013	138.034
P21266	Glutathione S-transferase Mu 3	GSTM3	26.5596	7.73534e-05	0.94505	95.7721	97.5543	409.161	151.483	92.4294	171.337	152.886	91.9503	95.4217	51.0605	153.808	147.831
P21281	V-type proton ATPase subunit B, brain isoform	ATP6V1B2	56.5007	4.92291e-05	0.965955	183.852	154.367	212.501	183.205	246.62	179.027	201.236	170.65	196.975	198.085	191.115	167.879
P21283	V-type proton ATPase subunit C 1	ATP6V1C1	43.9416	7.73534e-05	0.945039	110.197	104.096	131.231	117.519	145.38	110.511	125.548	128.827	119.082	114.103	125.066	125.148
P21291	Cysteine and glycine-rich protein 1	CSRP1	20.5674	7.07872e-05	0.955053	922.069	1305.46	615.961	570.761	555.651	1255.35	312.833	753.499	705.527	358.167	638.643	873.731
P21333	Filamin-A	FLNA	280.739	6.37836e-06	0.974394	1072.95	1469.48	744.753	987.476	741.789	2029.63	855.546	575.888	512.885	622.914	964.429	784.69
P21359	Neurofibromin	NF1	319.372	0.000189639	0.904191	65.8598	74.9908	67.7626	70.7905	66.0823	62.4495	52.8938	66.8408	82.6248	76.8469	56.9828	69.7263
P21397	Amine oxidase [flavin-containing] A	MAOA	59.6817	3.78594e-06	0.975661	3132.15	2489.48	2605.34	3159.3	1227.72	2886.21	2274.72	3146.81	3404.34	2840.8	1520.8	841.709
P21399	Cytoplasmic aconitate hydratase	ACO1	98.3989	8.1035e-05	0.941862	182.034	200.252	199.607	245.274	218.966	254.655	249.592	176.678	188.378	159.211	248.418	297.714
P21453	Sphingosine 1-phosphate receptor 1	S1PR1	42.8108	0.00563653	0.788689		121.992		102.084	109.206	84.5179			114.147	127.674		76.1999
P21462	fMet-Leu-Phe receptor	FPR1	38.4455	0.00015087	0.921423	285.867	198.729	198.063	110.382	229.585	193.566	322.319	171.151	137.809	230.916	94.2872	147.254
P21579	Synaptotagmin-1	SYT1	47.5731	0.00479848	0.792516				42.0753	39.3969		49.3474	44.9114		45.8261	26.6446
P21580	Tumor necrosis factor alpha-induced protein 3	TNFAIP3	89.614	0.000165644	0.912719	20.0894	19.7043	41.226	61.3858	25.9442	35.4117	55.4748	39.2421	67.3123	45.8064	34.1548	37.4985
P21589	5'-nucleotidase	NT5E	63.3677	7.07872e-05	0.959885	131.727	113.391	296.575	98.2876	181.649	141.067	143.403	194.182	220.181	180.714	180.848	158.464
P21675	Transcription initiation factor TFIID subunit 1	TAF1	212.677	0.00198517	0.813174	38.6732					13.3732	31.6436	18.6968	23.2705			17.1877
P21730	C5a anaphylatoxin chemotactic receptor 1	C5AR1	39.3355	0.00539206	0.789754	100.004					57.7972	73.9524		66.7321		87.0119
P21741	Midkine	MDK	15.5852	0.00132994	0.844223		55.0672	43.9469			101.136	67.5976			39.7323
P21757	Macrophage scavenger receptor types I and II	MSR1	49.7621	0.000113444	0.931222	50.5735	49.3983	63.2797	19.5911	34.224	30.7808	55.167	25.5483	35.9826	17.597	25.6611	12.0561
P21796	Voltage-dependent anion-selective channel protein 1	VDAC1	30.7726	7.07872e-05	0.958019	709.491	757.505	714.499	686.061	658.779	723.783	627.413	705.229	585.089	728.787	469.888	556.487
P21810	Biglycan	BGN	41.6541	3.84383e-05	0.96757	2267.27	2558.42	1329.82	1586.1	1927.65	3019.68	1613.61	1734.07	1282.35	1680.95	2322.64	2358.49
P21860	Receptor tyrosine-protein kinase erbB-3	ERBB3	148.098	0.001334	0.843206	39.2452	34.9198	65.9553	35.0697	110.282	38.6963	45.7401	46.8221	76.3387	68.6114	46.3861	37.9223
P21912	Succinate dehydrogenase [ubiquinone] iron-sulfur subunit, mitochondrial	SDHB	31.6297	8.02386e-05	0.942348	232.217	233.198	273.472	216.544	250.664	208.312	238.937	216.293	212.26	230.689	152.502	187.273
P21926	CD9 antigen	CD9	25.416	8.98651e-05	0.937203	196.596	212.732	147.49	146.789	143.09	235.27	179.565	114.456	98.7576	95.1008	116.676	118.181
P21953	2-oxoisovalerate dehydrogenase subunit beta, mitochondrial	BCKDHB	43.1225	9.70639e-05	0.934956	234.272	281.951	233.431	233.666	281.239	238.5	128.082	232.78	275.333	198.14	147.448	229.429
P21964	Catechol O-methyltransferase	COMT	30.0371	7.07872e-05	0.953662	221.995	220.378	245.442	175.116	234.752	185.918	259.195	166.574	167.145	113.613	188.924	187.477
P21980	Protein-glutamine gamma-glutamyltransferase 2	TGM2	77.3288	1.47084e-05	0.971859	2160.79	1906.54	1653.14	1617.21	1817.55	1830.15	2384.8	1430.13	1411.3	1480.62	1578.47	1379.9
P22033	Methylmalonyl-CoA mutase, mitochondrial	MMUT	83.1345	0.000105793	0.932945	94.1334	90.5576	107.585	109.529	152.39	121.338	98.9702	107.771	108.677	98.8489	94.6453	87.6812
P22059	Oxysterol-binding protein 1	OSBP	89.4206	7.07872e-05	0.953179	201.91	188.55	232.618	200.898	223.239	208.403	197.767	200.039	230.119	212.728	201.478	204.785
P22061	Protein-L-isoaspartate(D-aspartate) O-methyltransferase	PCMT1	24.6364	7.9658e-05	0.942998	191.527	159.355	219.099	165.565	208.894	202.739	249.805	173.732	198.719	216.202	207.064	164.415
P22087	rRNA 2'-O-methyltransferase fibrillarin	FBL	33.7842	7.07498e-05	0.96105	308.921	280.352	208.447	339.432	312.206	269.18	319.677	328.404	294.425	286.159	199.025	253.104
P22090	40S ribosomal protein S4, Y isoform 1	RPS4Y1	29.4556	7.07872e-05	0.958449	791.935	831.829	1246.35	847.801	1017.63	919.998	1034.73	850.007	946.558	1013.59	669.727	714.731
P22102	Trifunctional purine biosynthetic protein adenosine-3	GART	107.767	7.9658e-05	0.943025	98.5333	113.069	114.475	146.6	153.18	142.374	146.302	114.997	131.497	105.221	158.654	201.879
P22105	Tenascin-X	TNXB	458.388	1.75066e-06	0.977464	83.3884	186.784	139.405	77.6872	130.212	146.638	133.867	121.129	66.4934	94.268	163.119	146.117
P22234	Multifunctional protein ADE2	PAICS	47.0792	1.91973e-05	0.97086	151.85	142.171	173.056	165.239	202.467	176.717	144.173	184.472	187.85	184.08	259.709	176.417
P22304	Iduronate 2-sulfatase	IDS	61.873	0.00406443	0.796089	48.8715		19.3266			38.3706				25.0356		37.0218
P22307	Sterol carrier protein 2	SCP2	58.9936	0.000159018	0.915999	174.444	177.908	165.004	131.343	131.925	139.39	174.023	132.991	147.489	117.398	128.351	146.652
P22314	Ubiquitin-like modifier-activating enzyme 1	UBA1	117.849	7.07872e-05	0.960201	302.898	277.513	361.327	392.974	404.198	459.665	419.708	317.488	342.512	288.06	436.968	518.022
P22352	Glutathione peroxidase 3	GPX3	25.5523	0.000142695	0.924501	345.822	382.395	366.902	218.762	325.432	230.421	375.753	231.535	147.911	141.685	520.544	224.284
P22392	Nucleoside diphosphate kinase B	NME2	17.298	1.21983e-05	0.972479	413.302	372.517	448.309	556.633	558.756	500.887	497.705	394.577	432.904	423.652	523.801	588.824
P22413	Ectonucleotide pyrophosphatase/phosphodiesterase family member 1	ENPP1	104.924	7.17522e-05	0.950321	171.429	336.514	147.108	230.855	180.917	322.999	235.381	244.837	129.123	176.408	176.707	176.597
P22531	Small proline-rich protein 2E	SPRR2E	7.85535	0.00715727	0.782588									24.5121			49.7006
P22570	NADPH:adrenodoxin oxidoreductase, mitochondrial	FDXR	53.8368	9.78646e-05	0.934736	177.964	133.116	232.951	145.3	236.911	194.162	142.516	207.482	172.155	354.192	150.335	186.102
P22626	Heterogeneous nuclear ribonucleoproteins A2/B1	HNRNPA2B1	37.4297	7.07872e-05	0.956469	923.34	785.514	572.798	988.01	818.742	829.753	789.199	836.96	959.985	965.771	1120.41	982.534
P22670	MHC class II regulatory factor RFX1	RFX1	104.758	0.00054394	0.88047	60.0597	27.1928	34.3756	58.714	42.2788	24.7119	38.3783	21.8641	35.5458	46.6795	43.4777	47.9845
P22681	E3 ubiquitin-protein ligase CBL	CBL	99.6328	0.000953185	0.867225	67.3616	48.6146	54.9575	56.4313	52.593	48.6851	39.0861	42.38	44.5587	49.4234	64.9806	44.6909
P22692	Insulin-like growth factor-binding protein 4	IGFBP4	27.934	0.000132857	0.927064	54.3095	88.6375	36.3379		47.1287	23.3872	120.178	31.937	38.244	39.1305	85.6848	43.7295
P22694	cAMP-dependent protein kinase catalytic subunit beta	PRKACB	40.6227	7.52784e-05	0.946608	238.405	250.22	221.445	252.631	263.136	249.346	235.559	216.819	179.18	186.083	249.874	207.033
P22695	Cytochrome b-c1 complex subunit 2, mitochondrial	UQCRC2	48.443	7.17034e-05	0.950484	395.254	464.274	427.816	381.441	433.772	396.966	421.118	424.302	406.801	460.964	304.673	373.718
P22732	Solute carrier family 2, facilitated glucose transporter member 5	SLC2A5	54.974	0.0012241	0.857015		16.1459			29.8202	23.078	51.3484	31.7319
P22735	Protein-glutamine gamma-glutamyltransferase K	TGM1	89.7867	0.00237551	0.806634	72.6873							69.1822
P22748	Carbonic anhydrase 4	CA4	35.0323	0.000107222	0.932648	204.958	47.9877	255.892	102.571	71.0994	65.4087	69.3639	181.285	130.692	176.807	69.2109	35.7411
P22749	Granulysin	GNLY	16.374	0.000256242	0.894458							11.75				13964
P22792	Carboxypeptidase N subunit 2	CPN2	60.5566	0.0001436	0.924145	175.327	206.769	93.4535	117.418	118.548	96.938	132.029	166.728	111.174	67.7151	203.553	142.733
P22830	Ferrochelatase, mitochondrial	FECH	47.8622	8.0436e-05	0.942266	123.977	145.065	153.474	96.3219	150.323	118.59	118.265	115.922	138.258	131.047	134.626	98.7077
P22891	Vitamin K-dependent protein Z	PROZ	44.7439	0.000183829	0.906129	59.7091	69.1827		52.0735		31.7042	55.442	36.28	41.3995		65.8597	40.0364
P22894	Neutrophil collagenase	MMP8	53.4121	0.00366556	0.798092	109.419		68.6908		40.4086	44.117	127.632			51.3565	101.031
P22897	Macrophage mannose receptor 1	MRC1	166.012	7.52784e-05	0.947009	274.349	408.192	192.291	253.621	247.5	392.727	281.28	324.252	206.171	198.196	292.568	276.57
P23025	DNA repair protein complementing XP-A cells	XPA	31.3679	0.00313031	0.800991	55.7276	34.4929		38.9238		51.4359			24.7674			42.5211
P23083	Immunoglobulin heavy variable 1-2	IGHV1-2	13.0848	7.95095e-05	0.943296	2614.01	3065.64	3256.78	1439.69	1610.77	1895.29	1876.66	2270.96	1236.99	688.779	2235.64	1216.99
P23141	Liver carboxylesterase 1	CES1	62.5211	0.000113091	0.931304	86.9536	126	70.5419	90.1059	41.2428	87.5487	180.835	144.855	35.6934	54.4236	151.282	102.21
P23142	Fibulin-1	FBLN1	77.2141	6.13973e-05	0.963742	588.79	721.516	601.243	322.205	379.236	398.574	514.336	436.233	370.387	257.585	1425.62	650.737
P23193	Transcription elongation factor A protein 1	TCEA1	33.9696	0.000264806	0.893714	82.3789	67.2223	62.3088	94.309	73.3698	81.0472	83.5055	83.8853	79.0596	39.5821	85.9224	110.474
P23219	Prostaglandin G/H synthase 1	PTGS1	68.6864	8.21006e-05	0.941123	104.702	125.402	79.4721	63.2832	113.984	79.1736	123.69	84.8803	59.021	58.4549	104.175	73.6385
P23229	Integrin alpha-6	ITGA6	126.606	4.34255e-05	0.966886	291	327.52	365.623	254.765	264.77	200.393	267.097	340.91	227.601	236.419	223.159	199.62
P23246	Splicing factor, proline- and glutamine-rich	SFPQ	76.1493	2.33335e-05	0.970074	309.224	202.521	109.627	242.381	161.279	155.697	169.44	131.743	204.412	257.981	188.309	253.007
P23258	Tubulin gamma-1 chain	TUBG1	51.1699	8.54287e-05	0.939145	143.545	145.935	131.305	139.382	137.793	146.768	133.477	125.107	121.554	118.104	104.008	115.758
P23284	Peptidyl-prolyl cis-trans isomerase B	PPIB	23.7425	7.07872e-05	0.955016	2622.12	2123.81	2922.11	2288.33	3312.68	3221.17	2862.42	2212.2	3178.35	2562.91	2209.19	2839.35
P23297	Protein S100-A1	S100A1	10.5458	0.000393071	0.8861	80.6254				41.945	58.9798	108.374			23.4941	80.27
P23327	Sarcoplasmic reticulum histidine-rich calcium-binding protein	HRC	80.2437	0.0041074	0.795879	55.1494			57.1622						80.4387
P23368	NAD-dependent malic enzyme, mitochondrial	ME2	65.4436	7.07872e-05	0.956517	163.617	165.607	169.693	165.972	153.491	157.131	153.062	157.956	112.808	114.118	190.977	119.925
P23378	Glycine dehydrogenase (decarboxylating), mitochondrial	GLDC	112.73	0.000155365	0.919337	92.1374	88.2856	123.807	83.6795	145.755	88.3986	87.0906	97.173	154.823	115.824	66.1433	87.248
P23381	Tryptophan--tRNA ligase, cytoplasmic	WARS1	53.1654	2.22687e-05	0.970252	275.872	247.817	475.979	481.195	509.205	418.614	355.87	364.999	338.808	288.094	371.723	468.251
P23396	40S ribosomal protein S3	RPS3	26.6883	7.07872e-05	0.952448	495.33	525.257	587.868	522.227	536.51	562.545	565.784	545.786	645.39	658.09	460.34	564.041
P23434	Glycine cleavage system H protein, mitochondrial	GCSH	18.8846	7.07872e-05	0.952844	712.839	859.435	1233.78	1336.35	1003.64	900.339	869.622	1020.45	1526.02	1262.97	1086.91	871.311
P23443	Ribosomal protein S6 kinase beta-1	RPS6KB1	59.1395	0.001326	0.84675	53.2619	73.5428	76.434	68.4394	69.5605	56.807	60.0283	70.2667	66.8708	82.3666	50.1418	63.9102
P23458	Tyrosine-protein kinase JAK1	JAK1	133.277	0.000160064	0.915489	60.8205	52.912	41.3096	51.5091	47.6716	52.1109	45.8366	39.8254	42.4406	37.8934	29.3432	47.0521
P23467	Receptor-type tyrosine-protein phosphatase beta	PTPRB	224.301	0.000436113	0.88434	43.9891	36.873	58.4578	35.0878	37.883	44.144	34.964	44.8154	37.6231	39.3916	35.4714	29.3883
P23468	Receptor-type tyrosine-protein phosphatase delta	PTPRD	214.76	0.000134788	0.926626	128.548	112.883	127.484	105.257	98.2161	113.812	94.9146	134.18	115.19	130.792	121.699	108.229
P23469	Receptor-type tyrosine-protein phosphatase epsilon	PTPRE	80.6417	0.00395695	0.796623	56.9322	69.5129		136.928	214.971	290.797	157.86	109.384	100.038	100.455	155.32	140.642
P23470	Receptor-type tyrosine-protein phosphatase gamma	PTPRG	162.003	0.000211591	0.899771	68.1796	64.8753	57.2357	67.9589	65.7061	70.0588	78.7674	69.7394	74.765	71.2803	75.4187	66.7646
P23497	Nuclear autoantigen Sp-100	SP100	100.417	0.000264087	0.893779	202.092	160.245	226.924	193.681	186.952	139.174	160.963	159.531	164.707	173.119	172.486	161.298
P23508	Colorectal mutant cancer protein	MCC	93.0273	0.00165338	0.821613	45.1677	5.0565		49.769	45.2209	47.1786	13.5395	29.2582		34.3369	35.705	23.7412
P23511	Nuclear transcription factor Y subunit alpha	NFYA	36.8767	0.005083	0.791161	10.1311										13.5808
P23526	Adenosylhomocysteinase	AHCY	47.7161	7.07872e-05	0.951907	705.357	624.931	1073.2	927.308	897.981	761.714	961.613	847.633	962.476	859.687	897.848	933.287
P23528	Cofilin-1	CFL1	18.5025	7.07872e-05	0.960347	1214.47	984.193	1127.35	1126.39	1021.53	1107.71	1042.7	883.529	922.633	576.704	1374.82	1384.79
P23588	Eukaryotic translation initiation factor 4B	EIF4B	69.1512	6.95081e-06	0.974162	193.11	190.986	152.985	194.094	142.382	181.869	169.733	172.087	234.774	222.123	192.518	185.784
P23610	40-kDa huntingtin-associated protein	F8A1	39.103	0.000145719	0.923502	286.532	189.669	202.921	211.597	221.99	167.047	187.175	184.984	210.004	197.495	198.752	190.719
P23634	Plasma membrane calcium-transporting ATPase 4	ATP2B4	137.92	7.07872e-05	0.953801	188.41	189.235	142.202	143.043	152.521	165.784	189.843	154.515	161.17	153.316	141.327	132.201
P23743	Diacylglycerol kinase alpha	DGKA	82.6302	0.000342437	0.888556	89.0379	70.0332	54.0674	74.3212	61.2313	68.6923	71.3665	68.5931	69.6975	73.6031	72.8189	61.7898
P23769	Endothelial transcription factor GATA-2	GATA2	50.4999	0.000395745	0.885987	25.5788	3.49901	53.8095	41.7626			19.6616	9.58121	19.7822	19.392	24.6316	33.4043
P23771	Trans-acting T-cell-specific transcription factor GATA-3	GATA3	47.9159	0.00016415	0.913357	99.2937	79.8332	88.9073	86.7266		54.0762	117.848	67.0602	70.1252	38.2623	73.1999	86.4731
P23786	Carnitine O-palmitoyltransferase 2, mitochondrial	CPT2	73.777	7.07872e-05	0.954536	295.06	226.393	283.404	248.38	114.248	320.56	184.337	331.537	329.834	372.541	195.445	137.823
P23919	Thymidylate kinase	DTYMK	23.8193	8.27812e-05	0.94066	187.355	173.711	212.126	215.539	192.258	184.974	193.831	142.949	166.881	171.591	150.978	183.389
P23921	Ribonucleoside-diphosphate reductase large subunit	RRM1	90.0701	0.00125567	0.855178	115.908	55.6556	124.213	70.4754	122.388	123.281	58.4743	68.2418	96.0164	69.6003	76.8128	111.474
P23946	Chymase	CMA1	27.3248	0.00133526	0.839593									6.64935
P23975	Sodium-dependent noradrenaline transporter	SLC6A2	69.332	8.14974e-05	0.941529	167.356	180.294	144.676	95.8122	62.7902	72.8557	138.98	155.369	198.908	146.772	165.036	114.362
P24043	Laminin subunit alpha-2	LAMA2	343.905	2.76816e-05	0.969254	409.849	528.003	460.142	515.849	434.266	438.632	272.035	362.285	246.238	381.079	414.231	283.559
P24158	Myeloblastin	PRTN3	27.807	0.000129315	0.927896	778.305	267.725	782.442	450.368	408.923	536.149	802.632	497.761	535.734	381.185	659.711	311.709
P24298	Alanine aminotransferase 1	GPT	54.6369	0.000623597	0.877868	18.5998			17.0166	6.84192	7.74256			12.9043		67.248	12.5129
P24310	Cytochrome c oxidase subunit 7A1, mitochondrial	COX7A1	9.11752	0.00025134	0.894907	165.298	208.109	213.202	160.149	233.796	158.253	162.023	175.361	100.795	169.611	200.074	110.658
P24347	Stromelysin-3	MMP11	54.5899	0.00024269	0.895804	127.294	155.99	148.942	119.818	107.971	101.77	119.686	103.625	152.868	138.16	147.143	112.038
P24386	Rab proteins geranylgeranyltransferase component A 1	CHM	73.4757	0.000185746	0.905348	27.9294	28.6967			32.6589	54.8061	19.8737	35.8608	19.9574	20.5133	31.456	63.3105
P24390	ER lumen protein-retaining receptor 1	KDELR1	24.5421	0.000139765	0.925366	202.246	135.633	158.831	125.509	135.144	89.3359	87.335	123.589	139.7	107.213	107.175	100.122
P24468	COUP transcription factor 2	NR2F2	45.5712	0.000856751	0.870393	149.683	143.658	69.7207	118.358	145.275	111.694	98.6109	104.442	85.134	80.4868	70.6068	111.273
P24530	Endothelin receptor type B	EDNRB	49.6439	0.000463246	0.883268	99.1923	75.4959	124.382	53.9626	84.8858	71.6666	63.5965	120.844	73.0378	63.197	46.1302	54.4364
P24534	Elongation factor 1-beta	EEF1B2	24.7637	0.000129078	0.927943	114.58	109.95	143.098	129.343	125.951	145.971	112.181	137.727	124.831	177.332	128.556	136.869
P24539	ATP synthase F(0) complex subunit B1, mitochondrial	ATP5PB	28.9086	7.07872e-05	0.959825	382.445	376.875	429.017	429.525	414.116	375.616	402.182	409.249	392.643	458.136	302.818	326.926
P24557	Thromboxane-A synthase	TBXAS1	60.5183	0.000185183	0.905609	124.077	127.285	124.554	93.668	101.213	116.191	145.086	93.5178	74.7921	79.7209	76.2257	52.779
P24592	Insulin-like growth factor-binding protein 6	IGFBP6	25.3224	0.00349217	0.798987
P24593	Insulin-like growth factor-binding protein 5	IGFBP5	30.5702	8.51259e-05	0.939295	56.6822	160.878	53.0792	53.1252	45.6956	52.841	100.238	59.9966	53.783	36.5756	49.0622	31.1879
P24666	Low molecular weight phosphotyrosine protein phosphatase	ACP1	18.0425	7.84688e-08	0.983019	219.763	147.491	240.321	173.75	281.042	206.777	241.112	160.095	214.721	148.456	193.556	156.661
P24723	Protein kinase C eta type	PRKCH	77.8285	0.000157177	0.917733	70.2662	67.3367	49.384	51.5002	62.7432	63.4542	37.0498	76.2607	59.8614	68.1813	50.5318	53.7233
P24752	Acetyl-CoA acetyltransferase, mitochondrial	ACAT1	45.1996	6.18359e-05	0.96364	281.224	366.579	300.832	258.959	302.669	305.197	276.292	281.071	253.939	276.433	210.822	261.978
P24821	Tenascin	TNC	240.853	5.46902e-05	0.965091	74.2756	83.6893	126.193		226.613	122.02	652.597	63.4615	73.0428	48.4388	738.879	90.9239
P24844	Myosin regulatory light polypeptide 9	MYL9	19.8272	0.000271549	0.893163	486.664	598.089	370.454	325.119	370.993	520.975	373.222	233.15	179.45	107.659	165.655	220.306
P24863	Cyclin-C	CCNC	33.2427	0.00594208	0.78738								145.883	122.981		122.081
P24928	DNA-directed RNA polymerase II subunit RPB1	POLR2A	217.176	0.000113925	0.93111	126.317	116.183	102.944	114.416	83.2787	99.5072	127.91	111.876	108.947	126.329	106.058	99.4622
P24941	Cyclin-dependent kinase 2	CDK2	33.9295	0.000122749	0.929208	152.747	125.658	190.49	161.975	156.803	223.798	192.49	160.823	167.225	135.552	154.212	193.827
P25098	Beta-adrenergic receptor kinase 1	GRK2	79.5736	0.000698403	0.875464	97.9286	83.2495	85.4009	99.8502	80.0006	97.0606	92.7067	79.4096	84.1384	66.1154	81.643	108.508
P25101	Endothelin-1 receptor	EDNRA	48.7222	0.00140682	0.829898		17.5833		6.71208	18.3417	16.1443	32.5288	15.3351	11.7831	12.3408		17.5538
P25106	Atypical chemokine receptor 3	ACKR3	41.4928	0.000227215	0.897634	28.3193	20.6934	13.8765	20.5427		9.95093	24.3546	28.0639	23.0978	20.2379		14.0627
P25116	Proteinase-activated receptor 1	F2R	47.4405	0.00159946	0.823104
P25205	DNA replication licensing factor MCM3	MCM3	90.9808	0.000156908	0.917914	94.8877	78.7088	96.7549	86.5772	138.109	100.069	72.9759	93.6447	96.3349	91.5741	89.6774	134.322
P25311	Zinc-alpha-2-glycoprotein	AZGP1	34.2587	7.07872e-05	0.954155	201.68	187.195	168.356	163.449	182.024	209.271	254.683	198.298	128.274	101.49	289.214	191.515
P25325	3-mercaptopyruvate sulfurtransferase	MPST	33.1785	0.000121093	0.929502	206.157	209.517	209.164	239.792	237.13	240.595	249.474	188.116	185.262	179.216	215.986	208.108
P25398	40S ribosomal protein S12	RPS12	14.5149	7.07872e-05	0.957032	360.307	386.78	430.876	310.009	337.67	326.316	223.024	328.676	339.615	292.939	324.416	363.188
P25440	Bromodomain-containing protein 2	BRD2	88.0608	0.000625218	0.877811	109.897	83.5075	95.4696	110.76	85.3185	71.8173	134.859	63.81	92.0684	112.201	89.7791	91.1135
P25445	Tumor necrosis factor receptor superfamily member 6	FAS	37.7322	0.000623138	0.877884	30.4926	76.2386	26.6357	32.925	46.633	49.8913		32.811	25.4756	37.0931		35.6574
P25490	Transcriptional repressor protein YY1	YY1	44.7126	0.000127957	0.928175	92.577	100.017	83.5835	72.587	55.0835	72.4227	74.7746	76.4163	87.2343	69.9414	65.6593	93.5713
P25685	DnaJ homolog subfamily B member 1	DNAJB1	38.0441	6.69524e-05	0.962437	148.954	117.079	130.456	155.213	133.24	140.434	130.027	163.78	169.244	150.157	125.539	132.296
P25686	DnaJ homolog subfamily B member 2	DNAJB2	35.5801	0.000363982	0.887431	136.393	130.789	128.441	104.759	130.918	134.715	143.924	138.165	136.071	134.253	132.597	114.636
P25705	ATP synthase subunit alpha, mitochondrial	ATP5F1A	59.7506	7.10246e-05	0.951341	1213.24	1231.81	1273.32	1354.62	1298.61	1204.19	1277.38	1304.31	1193.68	1455.17	955.858	1040.58
P25774	Cathepsin S	CTSS	37.4957	0.00124377	0.855995	126.819	105.403	191.254	117.092	109.583	124.275	110.127	90.823	62.9893	45.1197	163.368	125.713
P25786	Proteasome subunit alpha type-1	PSMA1	29.5556	7.52784e-05	0.946759	180.326	156.903	160.792	176.093	212.483	181.062	183.729	195.674	206.073	214.225	249.819	175.886
P25787	Proteasome subunit alpha type-2	PSMA2	25.8986	5.34561e-05	0.965303	114	122	131.429	123.966	125.435	141.071	137.861	146.989	137.083	151.341	215.81	117.293
P25788	Proteasome subunit alpha type-3	PSMA3	28.4332	4.60919e-05	0.966483	637.518	603.272	574.163	608.814	733.369	625.188	557.049	674.787	669.071	724.016	989.883	631.746
P25789	Proteasome subunit alpha type-4	PSMA4	29.4838	9.31923e-05	0.936117	263.312	220.17	194.453	199.907	265.256	235.058	178.622	234.724	175.334	184.04	279.841	234.491
P25815	Protein S100-P	S100P	10.3999	9.31923e-05	0.936117	433.591	419.561	708.87	511.476	451.731	452.755	548.02	413.312	532.46	651.087	523.731	402.996
P25940	Collagen alpha-3(V) chain	COL5A3	172.121	0.00133476	0.842146	13.3104	11.4731		31.7866	26.1868	53.3615			22.1197	24.6685	48.1755	45.9573
P25942	Tumor necrosis factor receptor superfamily member 5	CD40	30.619	0.000880223	0.869647	90.139	72.4112	77.4947	37.3617	80.3568	66.9135		66.5273	56.5592	42.2577	76.4557	80.8708
P26006	Integrin alpha-3	ITGA3	116.612	5.72007e-05	0.964705	178.273	181.965	181.77	159.549	183.152	154.198	180.226	174.589	180.013	166.189	155.19	170.318
P26010	Integrin beta-7	ITGB7	86.9032	0.00218638	0.809134		181.365	214.836	396.733		271.984	177.648	238.538	145.579	121.84	292.328	278.456
P26012	Integrin beta-8	ITGB8	85.6319	0.000362038	0.887537	62.5161			41.169	33.1786	13.7448	134.551			51.0138	79.5546
P26022	Pentraxin-related protein PTX3	PTX3	41.9756	0.000112893	0.931346		184.474	116.997			170.228					241.255
P26038	Moesin	MSN	67.82	7.52784e-05	0.946797	217.648	204.869	214.545	320.05	290.617	325.197	282.136	217.302	221.104	179.511	278.512	299.709
P26045	Tyrosine-protein phosphatase non-receptor type 3	PTPN3	103.99	0.000143254	0.924335	69.2142	77.7255	44.0537	62.3673	43.8631	49.4897	69.303	75.5839	72.0305	81.0994	44.9168	57.9505
P26196	Probable ATP-dependent RNA helicase DDX6	DDX6	54.4168	7.9658e-05	0.943144	155.588	151.74	164.883	155.052	132.465	128.488	149.606	163.919	169.643	184.365	130.544	152.731
P26232	Catenin alpha-2	CTNNA2	105.313	0.000496576	0.882067	368.751	370.271	214.898	373.307	353.796	378.185	373.368	348.887	365.388	396.173	362.05	226.668
P26358	DNA (cytosine-5)-methyltransferase 1	DNMT1	183.165	8.28137e-05	0.940631	108.292	88.5805	120.747	102.397	101.517	99.9271	107.88	140.523	131.876	119.112	142.798	139.455
P26368	Splicing factor U2AF 65 kDa subunit	U2AF2	53.501	7.07872e-05	0.957619	338.917	262.363	223.405	275.131	183.584	213.008	229.883	229.714	230.503	211.826	222.108	260.401
P26373	60S ribosomal protein L13	RPL13	24.2615	5.59549e-06	0.9747	7050.79	6538.94	9587.57	7135.33	8077.89	6375.09	7253.32	6150.2	7130.65	7965.89	4999.21	4836.11
P26440	Isovaleryl-CoA dehydrogenase, mitochondrial	IVD	46.6508	6.13763e-05	0.963861	231.391	369.846	326.572	296.916	339.52	353.363	246.326	310.787	248.409	228.73	167.818	249.878
P26447	Protein S100-A4	S100A4	11.7285	5.97141e-05	0.964116	1614.31	1317.96	1276.92	1174.29	1520.03	1421.79	2221.24	835.201	996.971	1066.37	1746.71	786.345
P26572	Alpha-1,3-mannosyl-glycoprotein 2-beta-N-acetylglucosaminyltransferase	MGAT1	50.8784	9.88146e-05	0.934497	99.565	95.6859	129.79	95.6185	129.177	106.898	96.5744	93.3503	106.561	123.09	73.0731	104.847
P26583	High mobility group protein B2	HMGB2	24.0338	7.07872e-05	0.95498	427.311	344.393	494.337	495.024	522.083	464.528	459.672	474.316	492.347	397.305	403.412	461.985
P26599	Polypyrimidine tract-binding protein 1	PTBP1	57.2213	3.15868e-05	0.968706	425.098	335.827	343.38	473.636	376.015	427.026	376.617	361.478	516.32	457.014	474.113	498.884
P26639	Threonine--tRNA ligase 1, cytoplasmic	TARS1	83.4351	7.07872e-05	0.955213	192.649	205.294	208.268	254.646	261.56	275.313	220.486	219.45	197.727	188.58	328.565	302.973
P26640	Valine--tRNA ligase	VARS1	140.476	5.32085e-05	0.965357	207.611	202.458	186.471	236.449	283.215	243.544	206.517	242.26	212.641	264.073	236.334	261.97
P26641	Elongation factor 1-gamma	EEF1G	50.1188	8.49679e-05	0.93938	711.749	739.524	811.38	776.267	783.827	793.992	737.125	869.082	817.683	1116.17	855.363	971.987
P26885	Peptidyl-prolyl cis-trans isomerase FKBP2	FKBP2	15.6493	7.23262e-05	0.949044	343.168	261.609	533.638	352.814	414.126	411.278	359.856	281.532	512.361	317.719	251.397	378.15
P26927	Hepatocyte growth factor-like protein	MST1	80.3199	0.000163628	0.913528	115.158	103.439	104.431	91.5114	85.4548	83.0319	96.8672	76.3983	57.4578	64.7772	147.591	78.0071
P27037	Activin receptor type-2A	ACVR2A	57.8476	0.00298573	0.801858		12.1523				16.8426						15.6328
P27105	Stomatin	STOM	31.7308	7.07872e-05	0.95559	913.55	831.813	1030.07	786.686	1045.45	816.424	845.071	857.194	715.818	799.411	648.732	633.745
P27144	Adenylate kinase 4, mitochondrial	AK4	25.268	0.000211591	0.899763	135.636	92.628	196.54	142.455	135.646	78.1564	206.626	90.8347	140.659	160.772	112.473	92.9628
P27169	Serum paraoxonase/arylesterase 1	PON1	39.7313	7.52784e-05	0.946825	283.774	293.797	361.819	205.632	380.643	274.828	369.619	248.82	239.216	172.409	355.412	241.833
P27338	Amine oxidase [flavin-containing] B	MAOB	58.7629	7.07872e-05	0.957908	242.289	446.441	205.714	249.792	321.23	300.466	1264.27	257.19	216.989	218.872	402.649	127.039
P27348	14-3-3 protein theta	YWHAQ	27.7642	7.14425e-05	0.950996	446.404	399.35	439.367	520.717	456.852	466.681	454.001	326.385	369.351	255.202	490.322	520.862
P27361	Mitogen-activated protein kinase 3	MAPK3	43.1356	0.000105193	0.933047	211.554	204.598	192.63	237.517	246.099	216.868	280.307	220.402	198.548	156.147	255.416	248.996
P27448	MAP/microtubule affinity-regulating kinase 3	MARK3	84.4285	0.000127873	0.92821	59.7925	62.3221	66.248	55.8077	55.7319	56.2554	62.6561	53.1731	64.025	62.1925	43.5621	52.7618
P27449	V-type proton ATPase 16 kDa proteolipid subunit	ATP6V0C	15.7357	0.000311539	0.890389	98.1905	75.5707	76.7422	76.8062	88.3148	66.8359	76.3963	72.4685	90.2821	83.8083	55.5043	47.2722
P27482	Calmodulin-like protein 3	CALML3	16.8907	0.000538121	0.88066	4144.51	6209.21	5482.44	5827.1	5522.79	5481.21	5706.81	5558.77	5092.97	4589.6	6430.62	5494.32
P27487	Dipeptidyl peptidase 4	DPP4	88.2786	6.57611e-05	0.96273	847.464	899.749	700.383	722.998	601.235	763.029	540.672	724.052	534.926	571.214	794.029	662.818
P27540	Aryl hydrocarbon receptor nuclear translocator	ARNT	86.6365	0.00171237	0.82002	32.3261	28.4495		48.6662					14.4737	37.2068		45.2966
P27635	60S ribosomal protein L10	RPL10	24.6039	2.01095e-06	0.977197	490.72	436.141	623.379	469.456	600.623	508.953	524.841	434.743	583.565	533.332	289.978	455.91
P27694	Replication protein A 70 kDa DNA-binding subunit	RPA1	68.1382	0.000104733	0.933123	105.018	112.085	97.3048	113.93	122.546	111.351	98.488	93.4429	109.999	96.9597	127.414	125.227
P27695	DNA-(apurinic or apyrimidinic site) endonuclease	APEX1	35.5545	6.39068e-05	0.963252	260.685	282.065	231.812	238.306	301.051	257.081	171.727	226.202	224.935	202.644	259.525	339.43
P27701	CD82 antigen	CD82	29.6255	0.000259378	0.894189	56.5331	80.8275	47.3554	51.495	63.8903	66.6423	134.714	38.9047	37.7599	22.3614	44.1953	50.6035
P27707	Deoxycytidine kinase	DCK	30.5186	0.00136098	0.833105	83.5097		74.8196	72.4032	180.238	173.254	100.115	85.5213	152.514		139.904	175.698
P27708	CAD protein	CAD	242.984	0.000148133	0.922617	98.8744	98.3616	90.1553	93.2963	118.489	102.54	82.7368	80.1238	98.6879	108.871	86.848	93.8158
P27797	Calreticulin	CALR	48.1416	6.5446e-05	0.962837	597.589	538.73	885.023	637.261	847.603	827.534	533.39	634.227	754.772	689.584	747.605	904.477
P27816	Microtubule-associated protein 4	MAP4	121.005	1.20046e-05	0.972585	145.582	178.438	101.527	189.816	171.653	170.383	153.268	129.782	124.997	134.582	242.149	207.282
P27824	Calnexin	CANX	67.5683	7.07872e-05	0.959809	443.961	499.832	523.846	454.267	512.518	469.83	515.557	527.246	550.301	567.366	348.728	439.51
P27918	Properdin	CFP	51.2764	7.07872e-05	0.951585	194.667	180.034	138.705	36.7534	98.2858	134.245	30.7029	144.645	83.2186	71.2484	234.831	110.288
P27986	Phosphatidylinositol 3-kinase regulatory subunit alpha	PIK3R1	83.5984	7.66996e-05	0.945602	61.0017	52.1549	77.4572	66.1934	65.1004	62.8424	62.4879	61.7085	51.2225	47.3641	79.2388	70.2429
P27987	Inositol-trisphosphate 3-kinase B	ITPKB	102.376	0.00644118	0.785373				40.9713	32.0941	11.3805	25.4731	29.3471	19.9287	22.9405		25.3915
P28062	Proteasome subunit beta type-8	PSMB8	30.3543	7.66996e-05	0.945605	83.3395	89.8207	93.3438	91.4369	80.825	84.6671	83.81	86.8106	62.4987	72.3045	132.182	70.0629
P28065	Proteasome subunit beta type-9	PSMB9	23.2643	0.000388699	0.886289	34.9243	72.5835	50.9448	35.7113	36.5894	85.9279	47.348	38.3583			88.2113	22.4329
P28066	Proteasome subunit alpha type-5	PSMA5	26.411	7.07872e-05	0.958888	288.957	264.947	261.37	289.119	307.572	300.425	254.241	295.481	268.946	326.987	394.485	280.693
P28068	HLA class II histocompatibility antigen, DM beta chain	HLA-DMB	28.9431	0.00146794	0.827242			81.2349				58.5206		20.1355
P28070	Proteasome subunit beta type-4	PSMB4	29.2042	9.7113e-05	0.934938	700.591	727.05	718.701	744.137	816.915	704.504	732.364	774.711	743.467	859.224	1130.54	730.894
P28072	Proteasome subunit beta type-6	PSMB6	25.3577	8.05701e-05	0.942163	594.775	512.911	668.493	595.081	711.789	686.758	580.215	607.852	621.856	706.507	1051.68	459.909
P28074	Proteasome subunit beta type-5	PSMB5	28.4803	5.65081e-09	0.986332	273.286	228.167	273.841	260.424	311.075	252.067	260.312	287.092	299.927	310.572	390.022	245.355
P28161	Glutathione S-transferase Mu 2	GSTM2	25.7447	7.35348e-05	0.947986	134.855	145.69	339.447	227.442	119.518	274.367	286.035	93.4302	91.2385	105.817	152.344	205.916
P28288	ATP-binding cassette sub-family D member 3	ABCD3	75.4759	0.000118424	0.930124	106.239	100.686	93.9786	78.7465	95.4424	103.441	96.3532	105.987	109.125	102.013	81.731	90.5151
P28289	Tropomodulin-1	TMOD1	40.5692	0.000726088	0.874552	165.854	101.988	124.65	85.8902	170.983	83.7079	154.746	112.031	100.934	165.434	88.6258	27.2
P28290	Protein ITPRID2	ITPRID2	138.386	0.000270985	0.89321	105.466	83.3218	114.32	78.5597	66.4425	76.7762	98.4889	70.5848	89.8151	101.598	53.2355	72.7112
P28329	Choline O-acetyltransferase	CHAT	82.5358	0.000278413	0.892654	113.234	150.952	72.2064	127.022	87.436	305.46	129.771	100.665	87.3835	120.536	191.675	149.101
P28330	Long-chain specific acyl-CoA dehydrogenase, mitochondrial	ACADL	47.6556	0.00187606	0.815854	11.6559	25.1039		33.5997	8.98333	23.1085			19.6777	27.1241	31.6583	15.3149
P28331	NADH-ubiquinone oxidoreductase 75 kDa subunit, mitochondrial	NDUFS1	79.4675	4.06203e-05	0.967249	263.244	280.102	312.626	266.86	319.138	265.886	261.604	264.807	258.747	263.824	227.001	230.819
P28340	DNA polymerase delta catalytic subunit	POLD1	123.631	0.00453451	0.793783	52.3553	26.7783		23.465		35.6623		33.6236	43.48	41.5255	71.2181	55.6212
P28347	Transcriptional enhancer factor TEF-1	TEAD1	47.9455	0.000167012	0.912045	98.161	71.0295	66.0761	69.5004	73.7847	59.0019	90.0399	65.6578	76.2506	83.2835	56.8606	69.0883
P28370	Probable global transcription activator SNF2L1	SMARCA1	122.605	8.57215e-05	0.938984	156.866	123.134	152.742	114.22	108.648	107.346	138.77	124.829	149.421	158.183	111.829	119.22
P28482	Mitogen-activated protein kinase 1	MAPK1	41.3897	1.66876e-05	0.971405	368.129	366.082	390.67	406.299	405.167	449.798	475.858	346.748	326.668	295.41	396.47	382.358
P28676	Grancalcin	GCA	24.01	7.05004e-05	0.961206	228.947	169.286	235.887	202.224	210.268	202.512	255.304	202.262	150.219	165.302	139.461	137.208
P28702	Retinoic acid receptor RXR-beta	RXRB	56.9219	0.000160545	0.915258	101.638	67.8393	104.485	90.2374	75.9764	65.4787	91.6431	84.4651	59.8065	97.9566	63.3816	71.8587
P28715	DNA excision repair protein ERCC-5	ERCC5	133.108	0.00856519	0.777232	19.1191	48.6199						15.9596		16.5631		25.1831
[truncated: 5,829 more rows]
